# Supplementary material
Source: publisher figshare collection journal article supplement (https://f1000.figshare.com/articles/dataset/_/3080608)
Supplement: Supplementary file 1 [file 1]

## Sheet: High stringency UPR-HD diff
GO-ID	p-value	FDR	Number of UPR-HD diff genes included in GO category	Total number of genes included in GO category	Biological process	UPR-HD diff genes included
6986	4.1201e-12	4.548e-09	13	66	response to unfolded protein	EDEM3|HSP90AB1|HSPA5|EDEM1|HSPA4L|DERL1|HERPUD1|ERO1L|CREB3|DNAJB1|VAPB|DDIT3|DNAJC4
51789	4.6742e-12	4.548e-09	16	117	response to protein stimulus	EDEM3|HSP90AB1|HSPA5|EDEM1|HSPA4L|DERL1|RNF5|HERPUD1|ERO1L|CCNA1|CREB3|DNAJB1|VAPB|DDIT3|DNAJC4|STUB1
44267	1.2448e-11	8.0746e-09	67	2151	cellular protein metabolic process	FKBP10|HSP90AB1|GPAA1|PIGP|PIK3CB|ZDHHC1|ERO1L|UBL5|COL4A3BP|EEF2K|NEK2|SEC61B|PIM2|WHSC1L1|TRIM23|EIF2A|CCT2|USP8|EIF5B|ALG9|ALG5|OXSR1|SIRT1|RBX1|GAK|TBL1XR1|DAD1|TCP1|DNAJC4|PSME2|MPPE1|TLR4|PRKAA1|TSG101|PRKAA2|RPN2|HDAC1|HSPA4L|DERL1|STK39|RRBP1|RNF5|USP19|PRDX2|VCPIP1|DNAJB1|PCBP2|EP400|DNAJB9|MAPK1|CSK|EDEM3|RANBP2|EIF2B4|USP25|UBE2I|HSPA5|EDEM1|EEF2|DNAJC18|SNRK|SPCS1|COPS5|PPT1|STUB1|P4H…
71445	5.1574e-11	2.5091e-08	9	27	cellular response to protein stimulus	CCNA1|HSPA5|VAPB|DDIT3|DERL1|STUB1|RNF5|HERPUD1|ERO1L
9987	1.4841e-10	5.3768e-08	167	9361	cellular process	IRS1|SLC35B1|EHMT2|PARK7|FNBP1L|ZDHHC1|ERO1L|COL4A3BP|BCAP29|NEK2|PIM2|SLC39A7|SLC12A6|WHSC1L1|TRIM23|EIF2A|TSPYL2|PDIA3|USP8|ALG9|ALG5|GTF3A|TSC2|SDHD|RBX1|RRAGA|RRAGC|SLC9A6|TBL1XR1|DDIT3|SCG5|PSME2|HPRT1|CYP2E1|MPPE1|ARL8B|RTN3|RAB5B|TSG101|RTN1|RPN2|INSIG2|HSPA4L|STK39|ARL1|VPS26A|RTN4|SNX3|PRDX3|PRDX2|VCPIP1|LDHA|SNX2|BCL2L11|PCBP1|PRDX1|PCBP2|EP400|SNX7|MCL1|EDEM3|EIF2B4|UBE2I|CHKA|GOT1|HSP…
19538	1.6578e-10	5.3768e-08	73	2609	protein metabolic process	FKBP10|HSP90AB1|GPAA1|PIGP|PIK3CB|ZDHHC1|ERO1L|UBL5|COL4A3BP|EEF2K|CAPNS1|FBXO3|NEK2|SEC61B|PIM2|WHSC1L1|TRIM23|EIF2A|CCT2|USP8|EIF5B|ALG9|ALG5|OXSR1|SIRT1|RBX1|GAK|TBL1XR1|DAD1|TCP1|DNAJC4|SCG5|PSME2|MPPE1|TLR4|PRKAA1|TSG101|PRKAA2|RPN2|HDAC1|HSPA4L|DERL1|STK39|RRBP1|RNF5|USP19|DPP3|PRDX2|VCPIP1|DNAJB1|PCBP2|EP400|DNAJB9|MAPK1|CSK|EDEM3|RANBP2|EIF2B4|MBTPS1|USP25|UBE2I|HSPA5|EDEM1|EEF2|DNAJC18|S…
15031	6.3226e-10	1.7577e-07	34	755	protein transport	ARF4|RAB5B|TSG101|STX16|GOSR2|DERL1|SNX10|RRBP1|SNX30|SNX3|SEC61A2|RAB21|SNX2|VPS53|BCAP29|MAPK1|SEC61B|SNX7|RANBP2|PDIA3|SEC24A|COG6|GOT1|TSC2|ARFGAP3|ARL4D|GORASP1|VPS41|PPT1|SCG5|SEC24D|RAB5A|VPS28|ARF5
71216	9.1744e-10	1.8133e-07	10	49	cellular response to biotic stimulus	HSPA5|VAPB|DDIT3|DERL1|MAPK1|STUB1|TLR4|RNF5|HERPUD1|ERO1L
45184	9.2114e-10	1.8133e-07	34	766	establishment of protein localization	ARF4|RAB5B|TSG101|STX16|GOSR2|DERL1|SNX10|RRBP1|SNX30|SNX3|SEC61A2|RAB21|SNX2|VPS53|BCAP29|MAPK1|SEC61B|SNX7|RANBP2|PDIA3|SEC24A|COG6|GOT1|TSC2|ARFGAP3|ARL4D|GORASP1|VPS41|PPT1|SCG5|SEC24D|RAB5A|VPS28|ARF5
6984	9.318e-10	1.8133e-07	9	36	ER-nucleus signaling pathway	HSPA5|INSIG2|VAPB|DDIT3|DERL1|ATP2A2|EIF2A|HERPUD1|ERO1L
6810	1.7934e-09	3.1726e-07	70	2575	transport	ARF4|SLC35B1|ATP2A2|SNX10|PARK7|FNBP1L|ERO1L|SEC61A2|COL4A3BP|OSBP|BCAP29|TMED1|SEC61B|SLC39A7|SLC12A6|TMED5|PDIA3|COG6|SLC2A10|TSC2|SDHD|ARFGAP3|DNM1|DNM3|ARL4D|SLC9A6|DNAJC6|GORASP1|SCG5|MPPE1|VPS28|ARF5|RTN3|RAB5B|TSG101|STX16|GOSR2|DERL1|ARL1|VPS26A|RRBP1|SRI|SNX30|ATP2C1|SNX3|RAB21|SNX2|VPS53|MAPK1|SNX7|SLC38A2|RANBP2|SLC12A2|DYNC1H1|OSBPL8|SLC16A1|SLC12A5|SEC24A|CHKA|GOT1|SLC33A1|SLC16A10|I…
51234	3.1881e-09	5.1701e-07	70	2609	establishment of localization	ARF4|SLC35B1|ATP2A2|SNX10|PARK7|FNBP1L|ERO1L|SEC61A2|COL4A3BP|OSBP|BCAP29|TMED1|SEC61B|SLC39A7|SLC12A6|TMED5|PDIA3|COG6|SLC2A10|TSC2|SDHD|ARFGAP3|DNM1|DNM3|ARL4D|SLC9A6|DNAJC6|GORASP1|SCG5|MPPE1|VPS28|ARF5|RTN3|RAB5B|TSG101|STX16|GOSR2|DERL1|ARL1|VPS26A|RRBP1|SRI|SNX30|ATP2C1|SNX3|RAB21|SNX2|VPS53|MAPK1|SNX7|SLC38A2|RANBP2|SLC12A2|DYNC1H1|OSBPL8|SLC16A1|SLC12A5|SEC24A|CHKA|GOT1|SLC33A1|SLC16A10|I…
8104	7.982e-09	1.1948e-06	36	920	protein localization	ARF4|RAB5B|TSG101|GPAA1|STX16|GOSR2|DERL1|SNX10|RRBP1|SNX30|SNX3|SEC61A2|RAB21|SNX2|VPS53|BCAP29|MAPK1|SEC61B|SNX7|RANBP2|PDIA3|SEC24A|COG6|GOT1|TSC2|ARFGAP3|ARL4D|GORASP1|VPS41|PPT1|SCG5|CTNNB1|SEC24D|RAB5A|VPS28|ARF5
33036	1.0461e-08	1.4541e-06	40	1110	macromolecule localization	ARF4|RAB5B|TSG101|GPAA1|STX16|GOSR2|DERL1|SNX10|RRBP1|SNX30|SNX3|SEC61A2|RAB21|COL4A3BP|SNX2|VPS53|OSBP|BCAP29|MAPK1|SEC61B|SNX7|RANBP2|PDIA3|OSBPL8|SEC24A|COG6|CHKA|GOT1|TSC2|ARFGAP3|ARL4D|GORASP1|VPS41|PPT1|SCG5|CTNNB1|SEC24D|RAB5A|VPS28|ARF5
43161	5.5007e-08	6.6902e-06	13	139	proteasomal ubiquitin-dependent protein catabolic process	EDEM3|RPN2|HSPA5|EDEM1|DERL1|RNF5|USP19|RBX1|TBL1XR1|PCBP2|PSME2|STUB1|SEC61B
10498	5.5007e-08	6.6902e-06	13	139	proteasomal protein catabolic process	EDEM3|RPN2|HSPA5|EDEM1|DERL1|RNF5|USP19|RBX1|TBL1XR1|PCBP2|PSME2|STUB1|SEC61B
51179	1.567e-07	1.7938e-05	72	2982	localization	ARF4|GPAA1|SLC35B1|ATP2A2|SNX10|PARK7|HMGB1|FNBP1L|ERO1L|SEC61A2|COL4A3BP|OSBP|BCAP29|TMED1|SEC61B|SLC39A7|SLC12A6|TMED5|PDIA3|COG6|SLC2A10|TSC2|SDHD|ARFGAP3|DNM1|DNM3|ARL4D|SLC9A6|DNAJC6|GORASP1|SCG5|MPPE1|VPS28|ARF5|RTN3|RAB5B|TSG101|STX16|GOSR2|DERL1|ARL1|VPS26A|RRBP1|SRI|SNX30|ATP2C1|SNX3|RAB21|SNX2|VPS53|MAPK1|SNX7|SLC38A2|RANBP2|SLC12A2|DYNC1H1|OSBPL8|SLC16A1|SLC12A5|SEC24A|CHKA|GOT1|SLC33A…
9607	1.9778e-07	2.1382e-05	22	447	response to biotic stimulus	EDEM3|HSP90AB1|HSPA5|EDEM1|HSPA4L|DERL1|RNF5|HERPUD1|ERO1L|PRDX3|PRDX2|CREB3|DNAJB1|IL6|VAPB|DDIT3|PCBP2|DNAJC4|MAPK1|STUB1|PIM2|TLR4
44260	2.439e-07	2.4158e-05	80	3506	cellular macromolecule metabolic process	FKBP10|HSP90AB1|GPAA1|SUV39H1|PIGP|PIK3CB|HMGB1|ZDHHC1|ERO1L|UBL5|SYNCRIP|COL4A3BP|EEF2K|NEK2|SEC61B|PIM2|WHSC1L1|TRIM23|EIF2A|CCT2|USP8|EIF5B|ALG9|ALG5|GTF3A|OXSR1|SIRT1|RBX1|GAK|CREB3|RRAGC|TBL1XR1|DAD1|DDIT3|TCP1|DNAJC4|PSME2|MPPE1|TLR4|DCP2|PRKAA1|TSG101|PRKAA2|RPN2|HDAC1|HSPA4L|DERL1|STK39|RRBP1|RNF5|USP19|PRDX2|VCPIP1|DNAJB1|PCBP1|PCBP2|EP400|DNAJB9|MAPK1|CSK|EDEM3|RANBP2|EIF2B4|USP25|UBE2I…
6511	2.4945e-07	2.4158e-05	17	277	ubiquitin-dependent protein catabolic process	EDEM3|USP8|USP25|TSG101|UBE2I|RPN2|HSPA5|EDEM1|DERL1|RNF5|USP19|RBX1|TBL1XR1|PCBP2|PSME2|STUB1|SEC61B
34620	2.7311e-07	2.4158e-05	6	21	cellular response to unfolded protein	HSPA5|VAPB|DDIT3|DERL1|HERPUD1|ERO1L
30968	2.7311e-07	2.4158e-05	6	21	endoplasmic reticulum unfolded protein response	HSPA5|VAPB|DDIT3|DERL1|HERPUD1|ERO1L
34976	3.1095e-07	2.5022e-05	7	34	response to endoplasmic reticulum stress	COL4A3BP|HSPA5|VAPB|DDIT3|DERL1|HERPUD1|ERO1L
43632	3.2146e-07	2.5022e-05	17	282	modification-dependent macromolecule catabolic process	EDEM3|USP8|USP25|TSG101|UBE2I|RPN2|HSPA5|EDEM1|DERL1|RNF5|USP19|RBX1|TBL1XR1|PCBP2|PSME2|STUB1|SEC61B
19941	3.2146e-07	2.5022e-05	17	282	modification-dependent protein catabolic process	EDEM3|USP8|USP25|TSG101|UBE2I|RPN2|HSPA5|EDEM1|DERL1|RNF5|USP19|RBX1|TBL1XR1|PCBP2|PSME2|STUB1|SEC61B
44237	3.9578e-07	2.9623e-05	102	4988	cellular metabolic process	PARK7|ZDHHC1|ERO1L|COL4A3BP|NEK2|PIM2|WHSC1L1|TRIM23|EIF2A|USP8|ALG9|ALG5|GTF3A|SDHD|RBX1|RRAGC|TBL1XR1|DDIT3|PSME2|HPRT1|CYP2E1|MPPE1|TSG101|RPN2|HSPA4L|STK39|ARL1|PRDX3|PRDX2|VCPIP1|LDHA|PCBP1|PRDX1|PCBP2|EP400|EDEM3|EIF2B4|UBE2I|CHKA|GOT1|HSPA5|EDEM1|SMARCA5|ASNS|EEF2|DNAJC18|LSM8|COPS5|PPT1|CYCS|RAB5A|FKBP10|HSP90AB1|GPAA1|SUV39H1|PIGP|ATP2A2|PIK3CB|HMGB1|PIK3C2A|UBL5|SMPD2|SYNCRIP|MAP1LC3B|M…
43170	5.2608e-07	3.7917e-05	87	4015	macromolecule metabolic process	FKBP10|HSP90AB1|GPAA1|SUV39H1|PIGP|PIK3CB|HMGB1|ZDHHC1|ERO1L|UBL5|SYNCRIP|COL4A3BP|EEF2K|CAPNS1|FBXO3|NEK2|SEC61B|PIM2|GUSB|WHSC1L1|TRIM23|EIF2A|CCT2|USP8|EIF5B|ALG9|ALG5|GTF3A|OXSR1|SIRT1|RBX1|GAK|CREB3|RRAGC|TBL1XR1|DAD1|DDIT3|TCP1|DNAJC4|SCG5|PSME2|MPPE1|TLR4|DCP2|PRKAA1|TSG101|PRKAA2|RPN2|HDAC1|HSPA4L|DERL1|STK39|RRBP1|RNF5|USP19|DPP3|PRDX2|VCPIP1|DNAJB1|PCBP1|PCBP2|EP400|DNAJB9|MAPK1|CSK|EDE…
30163	9.2069e-07	6.3988e-05	18	339	protein catabolic process	EDEM3|USP8|USP25|TSG101|UBE2I|RPN2|HSPA5|EDEM1|DERL1|RNF5|USP19|RBX1|TBL1XR1|PCBP2|PPT1|PSME2|STUB1|SEC61B
44238	1.0401e-06	6.9794e-05	105	5286	primary metabolic process	ZDHHC1|ERO1L|COL4A3BP|CAPNS1|OSBP|FBXO3|NEK2|PIM2|WHSC1L1|TRIM23|EIF2A|USP8|ALG9|ALG5|GTF3A|RBX1|RRAGC|TBL1XR1|DDIT3|SCG5|PSME2|HPRT1|CYP2E1|MPPE1|TSG101|RPN2|INSIG2|HSPA4L|STK39|ARL1|DPP3|PRDX2|VCPIP1|LDHA|PCBP1|PCBP2|EP400|EDEM3|OSBPL8|EIF2B4|UBE2I|CHKA|GOT1|HSPA5|EDEM1|SMARCA5|ASNS|EEF2|DNAJC18|LSM8|COPS5|PPT1|CYCS|FKBP10|HSP90AB1|GPAA1|SUV39H1|PIGP|ATP2A2|PIK3CB|HMGB1|PIK3C2A|UBL5|SMPD2|SYNCR…
51603	1.259e-06	8.1667e-05	17	311	proteolysis involved in cellular protein catabolic process	EDEM3|USP8|USP25|TSG101|UBE2I|RPN2|HSPA5|EDEM1|DERL1|RNF5|USP19|RBX1|TBL1XR1|PCBP2|PSME2|STUB1|SEC61B
44257	1.4363e-06	9.0165e-05	17	314	cellular protein catabolic process	EDEM3|USP8|USP25|TSG101|UBE2I|RPN2|HSPA5|EDEM1|DERL1|RNF5|USP19|RBX1|TBL1XR1|PCBP2|PSME2|STUB1|SEC61B
8152	1.4851e-06	9.0314e-05	114	5957	metabolic process	PARK7|ZDHHC1|ERO1L|COL4A3BP|CAPNS1|OSBP|FBXO3|NEK2|PIM2|WHSC1L1|TRIM23|EIF2A|USP8|ALG9|ALG5|GTF3A|SDHD|RBX1|RRAGC|TBL1XR1|DDIT3|SCG5|PSME2|HPRT1|CYP2E1|MPPE1|TSG101|RPN2|INSIG2|HSPA4L|STK39|ARL1|DPP3|PRDX3|PRDX2|VCPIP1|LDHA|PCBP1|PRDX1|PCBP2|EP400|RDH14|EDEM3|OSBPL8|EIF2B4|UBE2I|CHKA|GOT1|HSPA5|EDEM1|SMARCA5|ASNS|EEF2|DNAJC18|LSM8|COPS5|PPT1|CYCS|RAB5A|FKBP10|HSP90AB1|GPAA1|SUV39H1|PIGP|ATP2A2|PI…
16192	1.6324e-06	9.6263e-05	24	589	vesicle-mediated transport	ARF4|RTN3|SEC24A|GOT1|STX16|GOSR2|ARL1|TSC2|VPS26A|FNBP1L|ARFGAP3|DNM1|SNX3|DNM3|SNX2|DNAJC6|VPS41|PPT1|BCAP29|CTNNB1|MPPE1|SEC24D|RAB5A|ARF5
44248	2.2773e-06	0.00012812	28	776	cellular catabolic process	TSG101|RPN2|DERL1|RNF5|USP19|PRDX3|PRDX2|MAP1LC3B|MAP1LC3A|PRDX1|PCBP2|SEC61B|HIBCH|EDEM3|USP8|USP25|UBE2I|GOT1|HSPA5|EDEM1|SDHD|RBX1|TBL1XR1|PPT1|PSME2|CYCS|STUB1|DCP2
70887	2.3043e-06	0.00012812	19	399	cellular response to chemical stimulus	PRKAA2|GOT1|HSPA5|IRS1|DERL1|ASNS|HMGB1|RNF5|HERPUD1|ERO1L|PRDX3|PRDX2|CCNA1|IL6|VAPB|DDIT3|PRDX1|CTNNB1|STUB1
44265	2.5985e-06	0.00014046	20	441	cellular macromolecule catabolic process	EDEM3|USP8|USP25|TSG101|UBE2I|RPN2|HSPA5|EDEM1|DERL1|RNF5|USP19|RBX1|TBL1XR1|PCBP2|PPT1|PSME2|CYCS|STUB1|SEC61B|DCP2
6457	3.6943e-06	0.0001943	12	170	protein folding	RANBP2|FKBP10|UBL5|CCT2|DNAJB1|HSP90AB1|HSPA4L|TCP1|DNAJC4|DNAJB9|ERO1L|DNAJC18
71310	5.1121e-06	0.00026179	14	239	cellular response to organic substance	PRKAA2|GOT1|HSPA5|IRS1|DERL1|ASNS|RNF5|HERPUD1|ERO1L|CCNA1|VAPB|DDIT3|CTNNB1|STUB1
9057	5.2727e-06	0.00026309	21	503	macromolecule catabolic process	EDEM3|USP8|USP25|TSG101|UBE2I|RPN2|HSPA5|EDEM1|DERL1|RNF5|USP19|RBX1|TBL1XR1|PCBP2|PPT1|PSME2|CYCS|STUB1|SEC61B|GUSB|DCP2
9056	5.8158e-06	0.00028294	32	1006	catabolic process	TSG101|RPN2|DERL1|RNF5|USP19|PRDX3|PRDX2|LDHA|MAP1LC3B|MAP1LC3A|PRDX1|PCBP2|DLAT|SEC61B|GUSB|HIBCH|EDEM3|USP8|USP25|UBE2I|GOT1|HSPA5|EDEM1|SDHD|RBX1|TBL1XR1|PPT1|PSME2|CYCS|STUB1|GPD1L|DCP2
6464	6.4544e-06	0.00030635	42	1525	protein modification process	PRKAA1|TSG101|PRKAA2|RPN2|GPAA1|HDAC1|PIGP|STK39|PIK3CB|ZDHHC1|RNF5|ERO1L|PRDX2|VCPIP1|COL4A3BP|EEF2K|EP400|MAPK1|NEK2|CSK|PIM2|WHSC1L1|TRIM23|EIF2A|USP8|USP25|ALG9|UBE2I|ALG5|OXSR1|SIRT1|RBX1|GAK|SNRK|COPS5|DAD1|PPT1|STUB1|MPPE1|P4HB|TLR4|IL17A
10033	6.8112e-06	0.00031558	29	869	response to organic substance	HSP90AB1|PRKAA2|IRS1|HSPA4L|DERL1|RNF5|HERPUD1|ERO1L|PRDX3|PRDX2|DNAJB1|MAPK1|MCL1|EDEM3|EIF2B4|GOT1|HSPA5|EDEM1|ASNS|CCNA1|CREB3|IL6|VAPB|DDIT3|DNAJC4|CTNNB1|STUB1|CYP2E1|TLR4
42592	1.8748e-05	0.00084844	26	773	homeostatic process	IRS1|DERL1|ATP2A2|PARK7|PIK3CB|SRI|ATP2C1|HERPUD1|PRDX3|PRDX2|COL4A3BP|BCL2L11|PRDX1|MCL1|PDIA3|SLC12A2|EIF2B4|SLC12A5|GOT1|IL6|SLC9A6|DDIT3|PPT1|CTNNB1|P4HB|TLR4
43412	2.2874e-05	0.0010117	42	1606	macromolecule modification	PRKAA1|TSG101|PRKAA2|RPN2|GPAA1|HDAC1|PIGP|STK39|PIK3CB|ZDHHC1|RNF5|ERO1L|PRDX2|VCPIP1|COL4A3BP|EEF2K|EP400|MAPK1|NEK2|CSK|PIM2|WHSC1L1|TRIM23|EIF2A|USP8|USP25|ALG9|UBE2I|ALG5|OXSR1|SIRT1|RBX1|GAK|SNRK|COPS5|DAD1|PPT1|STUB1|MPPE1|P4HB|TLR4|IL17A
30433	2.8388e-05	0.0012276	5	27	ER-associated protein catabolic process	HSPA5|EDEM1|DERL1|SEC61B|RNF5
42221	3.184e-05	0.001347	39	1464	response to chemical stimulus	PRKAA1|HSP90AB1|PRKAA2|IRS1|HSPA4L|DERL1|PARK7|PIK3CB|HMGB1|RNF5|HERPUD1|ERO1L|PRDX3|PRDX2|DNAJB1|PRDX1|MAPK1|MCL1|EDEM3|EIF2B4|GOT1|HSPA5|EDEM1|ENTPD6|TSC2|ASNS|OXSR1|CCNA1|CREB3|IL6|DAD1|VAPB|DDIT3|DNAJC4|CTNNB1|HYOU1|STUB1|CYP2E1|TLR4
6950	5.0161e-05	0.0020769	44	1773	response to stress	ARF4|RTN3|PRKAA1|HSP90AB1|PRKAA2|INSIG2|HSPA4L|DERL1|STK39|PARK7|PIK3CB|HMGB1|RNF5|HERPUD1|ERO1L|PRDX3|PRDX2|DNAJB1|COL4A3BP|MAP1LC3A|PRDX1|PCBP2|MAPK1|EIF2A|EDEM3|SLC12A2|EIF2B4|HSPA5|EDEM1|TUBB|TSC2|ASNS|OXSR1|SIRT1|RBX1|CREB3|IL6|VAPB|DDIT3|DNAJC4|HYOU1|STUB1|TLR4|IL17A
51716	7.1724e-05	0.0029078	29	987	cellular response to stimulus	PRKAA2|IRS1|INSIG2|DERL1|HMGB1|RNF5|HERPUD1|ERO1L|PRDX3|PRDX2|LDHA|COL4A3BP|MAP1LC3A|PRDX1|MAPK1|EIF2A|EIF2B4|GOT1|HSPA5|ASNS|SIRT1|RBX1|CCNA1|IL6|VAPB|DDIT3|CTNNB1|STUB1|TLR4
183	8.4046e-05	0.0033378	3	7	chromatin silencing at rDNA	SUV39H1|SMARCA5|SIRT1
33554	0.00011198	0.0043582	21	619	cellular response to stress	EIF2B4|HSPA5|INSIG2|DERL1|ASNS|HMGB1|SIRT1|RNF5|HERPUD1|ERO1L|RBX1|PRDX3|PRDX2|COL4A3BP|MAP1LC3A|VAPB|DDIT3|PRDX1|MAPK1|STUB1|EIF2A
6508	0.00015707	0.0059932	23	730	proteolysis	EDEM3|USP8|MBTPS1|USP25|TSG101|UBE2I|RPN2|HSPA5|EDEM1|DERL1|RNF5|USP19|RBX1|DPP3|SPCS1|CAPNS1|TBL1XR1|PCBP2|FBXO3|PSME2|STUB1|SEC61B|MBTPS2
44419	0.00016071	0.0060142	14	327	interspecies interaction between organisms	RTN3|TSG101|UBE2I|HDAC1|SUV39H1|DERL1|SIRT1|SYNCRIP|CREB3|RRAGA|VAPB|MAPK1|TLR4|TRIM23
71218	0.00018517	0.0067987	2	2	cellular response to misfolded protein	STUB1|RNF5
45767	0.0002004	0.0072219	5	40	regulation of anti-apoptosis	IL6|PRKAA1|CTNNB1|SIRT1|RTN4
23034	0.00021586	0.0076375	31	1158	intracellular signaling pathway	ARF4|RAB5B|PRKAA1|IRS1|INSIG2|DERL1|ARL1|ATP2A2|PIK3CB|PIK3C2A|HERPUD1|ERO1L|RAB21|PRDX2|SMPD2|MAPK1|CSK|TRIM23|EIF2A|HSPA5|TSC2|OXSR1|ARL4D|RRAGC|VAPB|DDIT3|CTNNB1|TLR4|RAB5A|ARF5|ARL8B
19725	0.00022289	0.0077454	17	466	cellular homeostasis	PDIA3|SLC12A2|EIF2B4|SLC12A5|ATP2A2|PARK7|PIK3CB|SRI|ATP2C1|HERPUD1|PRDX3|PRDX2|DDIT3|PRDX1|PPT1|P4HB|MCL1
45454	0.00027474	0.0093796	6	66	cell redox homeostasis	PRDX3|PDIA3|PRDX2|DDIT3|PRDX1|P4HB
34613	0.0002966	0.0098447	16	433	cellular protein localization	RANBP2|PDIA3|SEC24A|GPAA1|STX16|DERL1|TSC2|ARFGAP3|SNX2|VPS41|SCG5|BCAP29|CTNNB1|MAPK1|SEC61B|SEC24D
46907	0.00029848	0.0098447	21	665	intracellular transport	RANBP2|PDIA3|SEC24A|STX16|GOSR2|DERL1|ARL1|TSC2|ATP2A2|VPS26A|ARFGAP3|ATP2C1|SNX2|DNAJC6|VPS41|SCG5|BCAP29|MAPK1|MPPE1|SEC61B|SEC24D
10941	0.00031462	0.010051	25	867	regulation of cell death	HDAC1|HMGB1|RTN4|HERPUD1|PRDX3|PRDX2|SMPD2|BCL2L11|PRDX1|MAPK1|PIM2|MCL1|PDIA3|HSPA5|TUBB|ASNS|SIRT1|RRAGA|IL6|DAD1|DDIT3|PPT1|CTNNB1|CYCS|TLR4
46489	0.00031648	0.010051	5	44	phosphoinositide biosynthetic process	ALG9|GPAA1|PIGP|MPPE1|PIK3C2A
70727	0.00032024	0.010051	16	436	cellular macromolecule localization	RANBP2|PDIA3|SEC24A|GPAA1|STX16|DERL1|TSC2|ARFGAP3|SNX2|VPS41|SCG5|BCAP29|CTNNB1|MAPK1|SEC61B|SEC24D
46474	0.000379	0.011707	6	70	glycerophospholipid biosynthetic process	ALG9|CHKA|GPAA1|PIGP|MPPE1|PIK3C2A
42743	0.00039685	0.012067	4	26	hydrogen peroxide metabolic process	PRDX3|PRDX2|PRDX1|PARK7
65008	0.00043414	0.012998	37	1541	regulation of biological quality	GPAA1|IRS1|HDAC1|DERL1|ATP2A2|PARK7|PIK3CB|SRI|ATP2C1|RTN4|HERPUD1|PRDX3|PRDX2|COL4A3BP|BCL2L11|PRDX1|WHSC1L1|MCL1|TSPYL2|PDIA3|SLC12A2|EIF2B4|SLC12A5|GOT1|TSC2|IL6|RRAGC|SLC9A6|ARPC3|DDIT3|PPT1|SCG5|CTNNB1|P4HB|TLR4|RAB5A|DBN1
48193	0.00045231	0.013336	8	132	Golgi vesicle transport	SEC24A|STX16|DNAJC6|GOSR2|VPS41|ARL1|MPPE1|SEC24D
6886	0.00047808	0.013886	14	364	intracellular protein transport	RANBP2|PDIA3|SEC24A|STX16|DERL1|TSC2|ARFGAP3|SNX2|VPS41|SCG5|BCAP29|MAPK1|SEC61B|SEC24D
6515	0.00055049	0.015754	2	3	misfolded or incompletely synthesized protein catabolic process	STUB1|RNF5
42981	0.00058345	0.016455	24	852	regulation of apoptosis	PDIA3|HSPA5|HDAC1|TUBB|ASNS|HMGB1|SIRT1|RTN4|HERPUD1|PRDX3|PRDX2|SMPD2|IL6|BCL2L11|DAD1|DDIT3|PRDX1|PPT1|CTNNB1|CYCS|MAPK1|PIM2|TLR4|MCL1
43067	0.0006657	0.018507	24	860	regulation of programmed cell death	PDIA3|HSPA5|HDAC1|TUBB|ASNS|HMGB1|SIRT1|RTN4|HERPUD1|PRDX3|PRDX2|SMPD2|IL6|BCL2L11|DAD1|DDIT3|PRDX1|PPT1|CTNNB1|CYCS|MAPK1|PIM2|TLR4|MCL1
30384	0.00067854	0.018598	6	78	phosphoinositide metabolic process	ALG9|GPAA1|PIGP|MPPE1|PIK3CB|PIK3C2A
51641	0.00079855	0.021583	26	977	cellular localization	GPAA1|STX16|GOSR2|DERL1|ARL1|ATP2A2|VPS26A|SRI|ATP2C1|SNX2|BCAP29|MAPK1|SEC61B|RANBP2|PDIA3|SEC24A|TSC2|ARFGAP3|ARL4D|IL6|DNAJC6|VPS41|SCG5|CTNNB1|MPPE1|SEC24D
6497	0.00082554	0.021799	5	54	protein amino acid lipidation	ALG9|GPAA1|PIGP|MPPE1|ZDHHC1
42157	0.00082894	0.021799	6	81	lipoprotein metabolic process	ALG9|GPAA1|PIGP|PPT1|MPPE1|ZDHHC1
45017	0.00094267	0.024459	6	83	glycerolipid biosynthetic process	ALG9|CHKA|GPAA1|PIGP|MPPE1|PIK3C2A
43687	0.00097064	0.024652	31	1265	post-translational protein modification	PRKAA1|TSG101|PRKAA2|GPAA1|HDAC1|STK39|PIK3CB|RNF5|ERO1L|PRDX2|VCPIP1|COL4A3BP|EEF2K|EP400|MAPK1|NEK2|CSK|PIM2|WHSC1L1|TRIM23|EIF2A|USP8|UBE2I|OXSR1|SIRT1|RBX1|GAK|SNRK|COPS5|STUB1|TLR4
44403	0.00097545	0.024652	5	56	symbiosis, encompassing mutualism through parasitism	RRAGA|HDAC1|VAPB|DERL1|TLR4
45768	0.0010083	0.025155	4	33	positive regulation of anti-apoptosis	IL6|PRKAA1|CTNNB1|SIRT1
42149	0.0010911	0.026877	2	4	cellular response to glucose starvation	HSPA5|ASNS
6506	0.0011306	0.027502	4	34	GPI anchor biosynthetic process	ALG9|GPAA1|PIGP|MPPE1
42158	0.001237	0.02972	5	59	lipoprotein biosynthetic process	ALG9|GPAA1|PIGP|MPPE1|ZDHHC1
6505	0.001263	0.029974	4	35	GPI anchor metabolic process	ALG9|GPAA1|PIGP|MPPE1
6650	0.0013459	0.031179	7	121	glycerophospholipid metabolic process	ALG9|CHKA|GPAA1|PIGP|MPPE1|PIK3CB|PIK3C2A
31396	0.0013459	0.031179	7	121	regulation of protein ubiquitination	UBL5|RPN2|RNF139|HSPA5|PSME2|STUB1|VPS28
22415	0.0014381	0.032924	5	61	viral reproductive process	CREB3|RRAGA|TSG101|VAPB|DERL1
16043	0.0014627	0.033024	52	2561	cellular component organization	ECM2|GPAA1|IRS1|EHMT2|SUV39H1|HMGB1|FNBP1L|COL4A3BP|MAP1LC3A|H2AFJ|NEK2|HMG20A|PIM2|WHSC1L1|EIF2A|TSPYL2|USP8|TUBB|TSC2|SIRT1|DNM1|DNM3|CCNA1|TBL1XR1|DNAJC6|GORASP1|TCP1|HPRT1|DBN1|RAB5B|PRKAA2|HDAC1|GOSR2|ARL1|ATP2C1|SNX3|PRDX3|VCPIP1|SNX2|EP400|DYNC1H1|UBE2I|SEC24A|H3F3A|SMARCA5|NAP1L3|IL6|PPT1|CTNNB1|CYCS|SEC24D|RAB5A
42744	0.0014764	0.033024	3	17	hydrogen peroxide catabolic process	PRDX3|PRDX2|PRDX1
51649	0.001641	0.036288	23	865	establishment of localization in cell	RANBP2|PDIA3|SEC24A|STX16|GOSR2|DERL1|ARL1|TSC2|ATP2A2|VPS26A|ARFGAP3|ATP2C1|ARL4D|IL6|SNX2|DNAJC6|VPS41|SCG5|BCAP29|MAPK1|MPPE1|SEC61B|SEC24D
30970	0.0018021	0.038966	2	5	retrograde protein transport, ER to cytosol	DERL1|SEC61B
51788	0.0018021	0.038966	2	5	response to misfolded protein	STUB1|RNF5
51701	0.0019016	0.039988	4	39	interaction with host	RRAGA|VAPB|DERL1|TLR4
6888	0.0019016	0.039988	4	39	ER to Golgi vesicle-mediated transport	SEC24A|GOSR2|MPPE1|SEC24D
42542	0.001911	0.039988	5	65	response to hydrogen peroxide	PRDX3|PRDX2|DDIT3|PRDX1|PARK7
6996	0.001972	0.040825	32	1380	organelle organization	RAB5B|HDAC1|EHMT2|SUV39H1|ARL1|ATP2C1|PRDX3|VCPIP1|COL4A3BP|MAP1LC3A|H2AFJ|EP400|NEK2|HMG20A|PIM2|WHSC1L1|EIF2A|TSPYL2|DYNC1H1|USP8|UBE2I|TUBB|H3F3A|SMARCA5|NAP1L3|SIRT1|CCNA1|TBL1XR1|GORASP1|PPT1|CTNNB1|DBN1
46486	0.0020003	0.040975	8	166	glycerolipid metabolic process	ALG9|CHKA|GPAA1|PIGP|MPPE1|PIK3CB|PIK3C2A|SIRT1
19637	0.0022337	0.045209	9	208	organophosphate metabolic process	SMPD2|ALG9|CHKA|GPAA1|PIGP|MPPE1|PIK3CB|GPD1L|PIK3C2A
7264	0.0022565	0.045209	11	292	small GTPase mediated signal transduction	RAB21|ARF4|ARL4D|RAB5B|RRAGC|ARL1|MAPK1|RAB5A|ARF5|TRIM23|ARL8B
16044	0.0022767	0.045209	13	382	cellular membrane organization	SEC24A|GOSR2|TSC2|FNBP1L|DNM1|SNX3|DNM3|VCPIP1|SNX2|DNAJC6|PPT1|SEC24D|RAB5A
61024	0.002329	0.045416	13	383	membrane organization	SEC24A|GOSR2|TSC2|FNBP1L|DNM1|SNX3|DNM3|VCPIP1|SNX2|DNAJC6|PPT1|SEC24D|RAB5A
16032	0.0023338	0.045416	5	68	viral reproduction	CREB3|RRAGA|TSG101|VAPB|DERL1

## Sheet: Low stringency UPR-HD diff_reg
GO-ID	p-value	FDR	Number of UPR-HD diff genes included in GO category	Total number of genes included in GO category	Biological process	UPR-HD diff genes included
44267	4.9516e-52	1.8509e-48	322	2145	cellular protein metabolic process	APP|TRRAP|HDAC11|ARAF|ZDHHC1|RPL36AL|RPS18|PSMD2|AKT1|FBXO8|SEC63|TRIM23|EIF2A|ALG8|PRKCI|ALG9|PRKCH|CSNK2A1|ALG6|FBXO2|ALG5|DAPK3|PRKCD|ALG3|PSME2|PRKCQ|PRKD2|MPPE1|GCS1|ATF6|RPN2|RPN1|HSPA4L|UBE2J2|ZMPSTE24|UBE2J1|PRDX2|PRDX4|NUAK2|PCBP2|ATG7|ATG5|EDEM3|SRPK2|TRAP1|CREBBP|ST13|EIF2AK1|EDEM1|EIF2AK3|EIF2AK2|EIF2AK4|MRPL23|RPS26|NPLOC4|PPT1|CDK10|ATM|CALR|FBXL2|FBXL4|AARS|ATR|FKBP11|FKBP10|SETD2|…
9987	8.0992e-51	1.5137e-47	816	9336	cellular process	ITSN2|ATF2|EHMT2|ITSN1|ARAF|SCAMP5|RABGEF1|PSMD2|AKT1|ENDOG|CSNK2A1|FNBP1|GAPVD1|AR|DDIT3|PSME2|CYP2E1|MPPE1|ATF6|ATF3|ATF4|ABCB8|PLA2G6|RDH12|RDH11|ATG7|ATG5|EDEM3|CREBBP|PMM1|EIF2AK1|EDEM1|EIF2AK3|EIF2AK2|EIF2AK4|MRPL23|SETX|FASN|TDP1|EZH1|ARF3|ARF4|ARF1|PIGT|PIGN|SRPR|PIGP|SNX12|PRKAG1|SNX10|SNX11|ARHGAP4|IKBKB|SMPD2|CNOT6L|ELOVL4|SPHK1|ELOVL6|SLC39A12|EPS15L1|SLC39A14|SIRT1|HIST2H2BE|DUSP6|PS…
19538	1.178e-45	1.4678e-42	350	2603	protein metabolic process	APP|TRRAP|HDAC11|ARAF|ZDHHC1|CAPNS1|RPL36AL|RPS18|PSMD2|AKT1|FBXO3|FBXO8|SEC63|TRIM23|EIF2A|ALG8|PRKCI|ALG9|PRKCH|CSNK2A1|ALG6|FBXO2|ALG5|DAPK3|PRKCD|ALG3|AFG3L2|PSME2|PRKCQ|PRKD2|MPPE1|GCS1|ATF6|RPN2|RPN1|HSPA4L|UBE2J2|ZMPSTE24|UBE2J1|PRDX2|PRDX4|NUAK2|PCBP2|RCE1|ATG7|ATG5|EDEM3|SRPK2|TRAP1|CREBBP|ST13|EIF2AK1|EDEM1|EIF2AK3|EIF2AK2|EIF2AK4|MRPL23|RPS26|NPLOC4|PPT1|CDK10|ATM|CALR|FBXL2|FBXL4|AARS…
44237	3.5032e-41	3.2737e-38	525	4976	cellular metabolic process	ATF2|TRRAP|ARAF|PSMD2|AKT1|CCRN4L|PRKCI|ENDOG|PRKCH|CSNK2A1|DAPK3|PRKCD|HCFC1|AR|DDIT3|PSME2|PRKCQ|PRKD2|CYP2E1|MPPE1|GCS1|HPRT1|ATF6|ATF3|ATF4|RPN2|RPN1|HSPA4L|PLA2G6|PRDX3|PRDX2|LDHA|PRDX4|RDH12|RDH11|PRDX1|HMOX1|ATG7|ATG5|EDEM3|CREBBP|CHKB|PMM1|CHKA|ST13|EIF2AK1|EDEM1|EIF2AK3|EIF2AK2|TRIP4|EIF2AK4|PA2G4|MRPL23|SETX|NPLOC4|FASN|TDP1|PPT1|CDK10|SETD2|PIGT|PIGN|PIGP|PRKAG1|IKBKB|SMPD2|UBL5|CNOT6L…
44260	1.5101e-37	1.1289e-34	405	3500	cellular macromolecule metabolic process	ATF2|TRRAP|ARAF|PSMD2|AKT1|CCRN4L|PRKCI|ENDOG|PRKCH|CSNK2A1|DAPK3|PRKCD|HCFC1|AR|DDIT3|PSME2|PRKCQ|PRKD2|MPPE1|GCS1|ATF6|RPN2|RPN1|HSPA4L|PRDX2|PRDX4|ATG7|ATG5|EDEM3|CREBBP|ST13|EIF2AK1|EDEM1|EIF2AK3|EIF2AK2|TRIP4|EIF2AK4|PA2G4|MRPL23|SETX|NPLOC4|TDP1|PPT1|CDK10|SETD2|PIGT|PIGN|PIGP|PRKAG1|IKBKB|UBL5|CNOT6L|PAX5|SIRT1|DUSP6|PSMA5|PSMA6|COL2A1|TCP1|PIGL|PIGG|PKN3|PSMA7|LMAN1|PSMB5|NSD1|SPOP|RPS3|N…
44238	3.7373e-36	2.3284e-33	533	5274	primary metabolic process	ATF2|TRRAP|ARAF|CAPNS1|PSMD2|AKT1|CCRN4L|PRKCI|ENDOG|PRKCH|CSNK2A1|DAPK3|PRKCD|HCFC1|AR|DDIT3|PSME2|PRKCQ|PRKD2|CYP2E1|MPPE1|GCS1|HPRT1|ATF6|ATF3|ATF4|RPN2|RPN1|HSPA4L|PLA2G6|PRDX2|LDHA|PRDX4|RDH12|RDH11|ATG7|ATG5|EDEM3|CREBBP|CHKB|PMM1|CHKA|ST13|EIF2AK1|EDEM1|EIF2AK3|EIF2AK2|TRIP4|EIF2AK4|PA2G4|MRPL23|SETX|NPLOC4|FASN|TDP1|PPT1|CDK10|SETD2|PIGT|PIGN|PIGP|PRKAG1|IKBKB|SMPD2|UBL5|CASP12|CNOT6L|ELO…
43170	6.149e-33	3.2836e-30	432	4008	macromolecule metabolic process	ATF2|TRRAP|ARAF|CAPNS1|PSMD2|AKT1|CCRN4L|PRKCI|ENDOG|PRKCH|CSNK2A1|DAPK3|PRKCD|HCFC1|AR|DDIT3|PSME2|PRKCQ|PRKD2|MPPE1|GCS1|ATF6|RPN2|RPN1|HSPA4L|PRDX2|PRDX4|ATG7|ATG5|EDEM3|CREBBP|ST13|EIF2AK1|EDEM1|EIF2AK3|EIF2AK2|TRIP4|EIF2AK4|PA2G4|MRPL23|SETX|NPLOC4|TDP1|PPT1|CDK10|SETD2|PIGT|PIGN|PIGP|PRKAG1|IKBKB|UBL5|CASP12|CNOT6L|PAX5|SIRT1|DUSP6|PSMA5|PSMA6|COL2A1|TCP1|PIGL|PIGG|PKN3|PSMA7|LMAN1|PSMB5|NS…
8152	1.4907e-32	6.9651e-30	569	5942	metabolic process	ATF2|TRRAP|ARAF|CAPNS1|PSMD2|AKT1|CCRN4L|PRKCI|ENDOG|PRKCH|CSNK2A1|DAPK3|PRKCD|HCFC1|AR|DDIT3|PSME2|PRKCQ|PRKD2|CYP2E1|MPPE1|GCS1|HPRT1|ATF6|ATF3|ATF4|RPN2|RPN1|HSPA4L|PLA2G6|PRDX3|PRDX2|PRDX5|LDHA|PRDX4|RDH12|RDH11|PRDX1|HMOX1|RDH14|ATG7|ATG5|EDEM3|CREBBP|CHKB|PMM1|CHKA|ST13|EIF2AK1|EDEM1|SNAI3|EIF2AK3|EIF2AK2|TRIP4|EIF2AK4|PA2G4|MRPL23|SETX|NPLOC4|FASN|TDP1|PPT1|CDK10|SETD2|PIGT|PIGN|PIGP|PRKAG…
6986	1.8458e-26	7.6662e-24	37	67	response to unfolded protein	HERPUD2|HSP90AB1|DERL3|HSPA4L|DERL1|DERL2|HSPB1|UBE2J2|ERO1L|HERPUD1|DNAJB1|CCND1|CREB3L3|CREB3L2|CHAC1|EDEM3|HSP90AA1|TOR1A|HSPA1L|HSPA5|EIF2AK1|EDEM1|AMFR|EDEM2|EIF2AK3|EIF2AK2|EIF2AK4|HSPA2|DNAJA1|CREB3|IFNG|VAPB|DDIT3|DNAJC4|ATF6|HSPA1B|NFE2L2
6464	1.5096e-25	5.6429e-23	207	1521	protein modification process	APP|TRRAP|HDAC11|ARAF|ZDHHC1|AKT1|TRIM23|EIF2A|ALG8|PRKCI|ALG9|PRKCH|CSNK2A1|ALG6|FBXO2|ALG5|DAPK3|PRKCD|ALG3|PRKCQ|PRKD2|MPPE1|GCS1|RPN2|RPN1|UBE2J2|UBE2J1|PRDX2|PRDX4|NUAK2|ATG7|ATG5|SRPK2|CREBBP|EIF2AK1|EIF2AK3|EIF2AK2|EIF2AK4|PPT1|CDK10|ATM|FBXL2|ATR|SETD2|PIGT|ERO1LB|PIGN|GPAA1|PIGP|PRKAG1|IKBKB|PPP3CA|DBNL|SIRT1|DUSP6|GAK|UFC1|PIGL|PIGG|TLR4|PKN3|PPP2CB|PAK1|NSD1|PAK3|MAP4K5|PAK2|MAP4K3|SUZ…
6457	5.9872e-25	2.0345e-22	56	170	protein folding	FKBP11|FKBP10|HSP90AB1|ERO1LB|FKBP14|ERO1L|UBL5|SEC63|CCT2|HSP90AA1|AHSA1|DNAJB14|ALG12|PDIA6|DNAJC5|CANX|DNAJB11|TCP1|DNAJC4|ERP29|FKBP7|PFDN2|FKBP9|PPIB|ATF6|PPIA|PFDN5|FKBP2|HSPA4L|HSP90B1|LMAN1|DNAJB1|BAG5|BAG2|BAG1|DNAJB9|CCT7|NKTR|CCT4|RANBP2|TRAP1|TOR1A|ST13|WFS1|NFYC|TTC1|DNAJC14|DNAJC16|DNAJC18|DNAJA1|DNAJA3|DNAJA2|DNAJC10|PIN1|CALR|HSPA1B
15031	1.7691e-24	5.5107e-22	129	753	protein transport	KDELR1|SCAMP5|RABGEF1|AKT1|BCAP29|VPS35|SEC63|PDIA3|RAB2B|PRKCI|COG6|COG5|TAP2|TOMM34|TAP1|TSC2|PDIA4|TOM1L2|RAB30|RAB36|ERP29|SCG5|CHMP4B|KDELR2|KDELR3|TP53|VPS25|VPS28|BLZF1|COPB2|RAB5B|TSG101|TMED10|SEH1L|COPB1|PSEN1|VPS26B|HSP90B1|SNX3|NCKIPSD|SNX4|SNX1|SNX2|SSR1|SNX9|SNX7|RAB6A|ATG7|SNX8|SNX5|GOT1|RAB39B|DNAJC14|NACA|PPT1|TPP1|CALR|RAB5A|ARF3|ARF4|ARF1|SRPR|SNX12|SNX10|AP2A1|DBI|SNX11|RAB22A…
6984	1.9482e-24	5.602e-22	27	37	ER-nucleus signaling pathway	PPP1R15B|GSK3B|INSIG2|DERL3|DERL1|DERL2|ATP2A2|ERO1L|HERPUD1|PAK1|CCND1|LMNA|SCAP|EIF2A|HSPA5|WFS1|EIF2AK1|AMFR|EIF2AK3|EIF2AK2|EIF2AK4|IFNG|VAPB|DDIT3|ATF6|TP53|NFE2L2
45184	2.1817e-24	5.8251e-22	130	764	establishment of protein localization	KDELR1|SCAMP5|RABGEF1|AKT1|BCAP29|VPS35|SEC63|PDIA3|RAB2B|PRKCI|COG6|COG5|TAP2|TOMM34|TAP1|TSC2|PDIA4|TOM1L2|RAB30|RAB36|ERP29|SCG5|CHMP4B|KDELR2|KDELR3|TP53|VPS25|VPS28|BLZF1|COPB2|RAB5B|TSG101|TMED10|SEH1L|COPB1|PSEN1|VPS26B|HSP90B1|SNX3|NCKIPSD|SNX4|SNX1|SNX2|SSR1|SNX9|SNX7|RAB6A|ATG7|SNX8|SNX5|GOT1|RAB39B|DNAJC14|NACA|MDM2|PPT1|TPP1|CALR|RAB5A|ARF3|ARF4|ARF1|SRPR|SNX12|SNX10|AP2A1|DBI|SNX11|R…
43412	2.1046e-23	5.2445e-21	209	1602	macromolecule modification	APP|TRRAP|HDAC11|ARAF|ZDHHC1|AKT1|TRIM23|EIF2A|ALG8|PRKCI|ALG9|PRKCH|CSNK2A1|ALG6|FBXO2|ALG5|DAPK3|PRKCD|ALG3|PRKCQ|PRKD2|MPPE1|GCS1|RPN2|RPN1|UBE2J2|UBE2J1|PRDX2|PRDX4|NUAK2|ATG7|ATG5|SRPK2|CREBBP|EIF2AK1|EIF2AK3|EIF2AK2|EIF2AK4|PPT1|CDK10|ATM|FBXL2|ATR|SETD2|PIGT|ERO1LB|PIGN|GPAA1|PIGP|PRKAG1|IKBKB|PPP3CA|DBNL|SIRT1|DUSP6|GAK|UFC1|PIGL|PIGG|TLR4|PKN3|PPP2CB|PAK1|NSD1|PAK3|MAP4K5|PAK2|MAP4K3|SUZ…
51789	2.7839e-23	6.5039e-21	45	118	response to protein stimulus	HERPUD2|PCSK1|SETD2|HSP90AB1|DERL3|HSPA4L|DERL1|DERL2|HSPB1|UBE2J2|RNF5|ERO1L|HERPUD1|DNAJB1|CCNB1|CCND1|CREB3L3|CREB3L2|CHAC1|EDEM3|HSP90AA1|TOR1A|HSPA1L|HSPA5|EIF2AK1|EDEM1|SPHK1|AMFR|EDEM2|EIF2AK3|EIF2AK2|EIF2AK4|HSPA2|DNAJA1|CCNA1|CREB3|IFNG|VAPB|DDIT3|DNAJC4|BCL2|STUB1|ATF6|HSPA1B|NFE2L2
33036	5.1855e-23	1.1402e-20	162	1108	macromolecule localization	ATP8A2|ATP8A1|KDELR1|SCAMP5|RABGEF1|COL4A3BP|OSBP|AKT1|BCAP29|VPS35|SEC63|PDIA3|RAB2B|PRKCI|COG6|USP4|COG5|TAP2|TOMM34|ATP11C|TAP1|TSC2|ATP11B|PDIA4|SLC9A2|TOM1L2|RAB30|RAB36|SOAT2|ERP29|SCG5|CHMP4B|KDELR2|KDELR3|TLN1|SQSTM1|TP53|VPS25|SLC27A5|VPS28|CFTR|BLZF1|COPB2|RAB5B|TSG101|TMED10|SEH1L|COPB1|PSEN1|VPS26B|HSP90B1|SNX3|NCKIPSD|SNX4|SNX1|SNX2|SSR1|SNX9|SNX7|RAB6A|ATG7|SNX8|SNX5|OSBPL8|ATP8B4|O…
30163	2.543e-22	5.003e-20	77	339	protein catabolic process	UFD1L|USP38|FAF1|USP33|PARK2|CASP8|PSMD2|PIM1|AKT1|SEC61B|FBXO8|EPM2A|USP8|USP48|USP4|FBXO2|USP2|UBE4A|UBE4B|RAD23B|RBX1|PSMA5|PSMA6|AFG3L2|TBL1XR1|TRAF6|PSME2|PRKCQ|SQSTM1|USP13|USP14|CUL7|USP15|TSG101|RPN2|USP10|DERL3|CUL3|USP11|RPN1|DERL1|CUL1|DERL2|PSEN1|RNF5|PSMA7|RELA|USP19|HSP90B1|ZMPSTE24|PPP2CB|CCNB1|PSMB5|PCBP2|TBL1X|BUB3|EDEM3|USP25|UBE2I|HSPA5|USP20|USP21|EDEM1|AMFR|USP22|SYVN1|UBE2G1…
34976	2.4607e-22	5.003e-20	25	35	response to endoplasmic reticulum stress	PPP1R15B|GSK3B|DERL3|DERL1|DERL2|ERO1L|HERPUD1|SCAMP5|COL4A3BP|CCND1|CREB3L2|HSPA5|WFS1|EIF2AK1|AMFR|EIF2AK3|EIF2AK2|EIF2AK4|IFNG|VAPB|DDIT3|ATF6|TP53|ATF4|NFE2L2
51603	4.1762e-22	7.8053e-20	73	311	proteolysis involved in cellular protein catabolic process	UFD1L|USP38|FAF1|USP33|PARK2|CASP8|PSMD2|PIM1|SEC61B|FBXO8|EPM2A|USP8|USP48|USP4|FBXO2|USP2|UBE4A|UBE4B|RAD23B|RBX1|PSMA5|PSMA6|TBL1XR1|TRAF6|PSME2|PRKCQ|SQSTM1|USP13|USP14|CUL7|USP15|TSG101|RPN2|USP10|DERL3|CUL3|USP11|RPN1|DERL1|CUL1|DERL2|PSEN1|RNF5|PSMA7|RELA|USP19|HSP90B1|ZMPSTE24|PPP2CB|CCNB1|PSMB5|PCBP2|TBL1X|BUB3|EDEM3|USP25|UBE2I|HSPA5|USP20|USP21|EDEM1|AMFR|USP22|SYVN1|UBE2G1|UBE2G2|NFKB…
8104	5.1685e-22	9.2e-20	141	918	protein localization	KDELR1|SCAMP5|RABGEF1|AKT1|BCAP29|VPS35|SEC63|PDIA3|RAB2B|PRKCI|COG6|USP4|COG5|TAP2|TOMM34|TAP1|TSC2|PDIA4|SLC9A2|TOM1L2|RAB30|RAB36|ERP29|SCG5|CHMP4B|KDELR2|KDELR3|TLN1|SQSTM1|TP53|VPS25|VPS28|BLZF1|COPB2|RAB5B|TSG101|TMED10|SEH1L|COPB1|PSEN1|VPS26B|HSP90B1|SNX3|NCKIPSD|SNX4|SNX1|SNX2|SSR1|SNX9|SNX7|RAB6A|ATG7|SNX8|SNX5|GOT1|ZBTB16|RAB39B|DNAJC14|NACA|MDM2|PPT1|TPP1|CALR|RAB5A|ARF3|ARF4|ARF1|GPA…
44257	7.6587e-22	1.3013e-19	73	314	cellular protein catabolic process	UFD1L|USP38|FAF1|USP33|PARK2|CASP8|PSMD2|PIM1|SEC61B|FBXO8|EPM2A|USP8|USP48|USP4|FBXO2|USP2|UBE4A|UBE4B|RAD23B|RBX1|PSMA5|PSMA6|TBL1XR1|TRAF6|PSME2|PRKCQ|SQSTM1|USP13|USP14|CUL7|USP15|TSG101|RPN2|USP10|DERL3|CUL3|USP11|RPN1|DERL1|CUL1|DERL2|PSEN1|RNF5|PSMA7|RELA|USP19|HSP90B1|ZMPSTE24|PPP2CB|CCNB1|PSMB5|PCBP2|TBL1X|BUB3|EDEM3|USP25|UBE2I|HSPA5|USP20|USP21|EDEM1|AMFR|USP22|SYVN1|UBE2G1|UBE2G2|NFKB…
43687	1.0224e-20	1.6617e-18	171	1261	post-translational protein modification	APP|TRRAP|HDAC11|ARAF|PARK2|CDC14A|ERO1L|COL4A3BP|SLK|PIM1|AKT1|NEK1|PIM3|NEK2|PIM2|WHSC1L1|TRIM23|EIF2A|EPM2A|CDKL2|PDGFRB|MAP2K4|CSNK1G3|USP8|PRKCI|PRKCH|CSNK2A1|USP4|FBXO2|DAPK3|PRKCD|USP2|UBE4B|CDC25A|RBX1|CDC25B|PRKCQ|PRKD2|CSNK1G2|CDKL1|TSG101|SHC1|CUL3|STK39|CUL1|PSEN1|UBE2J2|STK4|UBE2J1|STK3|VCPIP1|PRDX2|STK33|PRDX4|NUAK2|EP400|RAB6A|MAP2K7|MARK4|MARK3|MARK2|ATG5|NEK8|UBE2F|SRPK2|NEK9|CRE…
43632	5.2075e-20	7.7862e-18	66	282	modification-dependent macromolecule catabolic process	UFD1L|USP38|FAF1|USP33|PARK2|PSMD2|PIM1|SEC61B|FBXO8|EPM2A|USP8|USP48|USP4|FBXO2|USP2|UBE4A|UBE4B|RAD23B|RBX1|PSMA5|PSMA6|TBL1XR1|PSME2|SQSTM1|USP13|USP14|CUL7|USP15|TSG101|RPN2|USP10|DERL3|CUL3|USP11|RPN1|DERL1|CUL1|DERL2|RNF5|PSMA7|USP19|HSP90B1|ZMPSTE24|PPP2CB|CCNB1|PSMB5|PCBP2|TBL1X|BUB3|EDEM3|USP25|UBE2I|HSPA5|USP20|USP21|EDEM1|AMFR|USP22|SYVN1|UBE2G1|UBE2G2|PSMC6|NPLOC4|MDM2|STUB1|FBXL4
19941	5.2075e-20	7.7862e-18	66	282	modification-dependent protein catabolic process	UFD1L|USP38|FAF1|USP33|PARK2|PSMD2|PIM1|SEC61B|FBXO8|EPM2A|USP8|USP48|USP4|FBXO2|USP2|UBE4A|UBE4B|RAD23B|RBX1|PSMA5|PSMA6|TBL1XR1|PSME2|SQSTM1|USP13|USP14|CUL7|USP15|TSG101|RPN2|USP10|DERL3|CUL3|USP11|RPN1|DERL1|CUL1|DERL2|RNF5|PSMA7|USP19|HSP90B1|ZMPSTE24|PPP2CB|CCNB1|PSMB5|PCBP2|TBL1X|BUB3|EDEM3|USP25|UBE2I|HSPA5|USP20|USP21|EDEM1|AMFR|USP22|SYVN1|UBE2G1|UBE2G2|PSMC6|NPLOC4|MDM2|STUB1|FBXL4
71445	1.0921e-19	1.5701e-17	21	28	cellular response to protein stimulus	HSPA5|EIF2AK1|DERL3|AMFR|EIF2AK3|DERL1|EIF2AK2|DERL2|EIF2AK4|RNF5|ERO1L|HERPUD1|CCNA1|CCNB1|CCND1|IFNG|VAPB|DDIT3|STUB1|ATF6|NFE2L2
44265	1.36e-19	1.8829e-17	85	441	cellular macromolecule catabolic process	UFD1L|USP38|FAF1|USP33|PARK2|CASP8|PSMD2|PIM1|SEC61B|FBXO8|EPM2A|USP8|USP48|ENDOG|USP4|FBXO2|USP2|UBE4A|UBE4B|RAD23B|RBX1|PSMA5|PSMA6|XRN1|TBL1XR1|TRAF6|XRN2|PSME2|PRKCQ|SQSTM1|DCP2|USP13|USP14|CUL7|USP15|TSG101|RPN2|USP10|DERL3|CUL3|USP11|RPN1|DERL1|CUL1|DERL2|PSEN1|RNF5|PSMA7|RELA|USP19|HSP90B1|ZMPSTE24|EXOSC7|PPP2CB|CCNB1|PSMB5|PCBP2|TBL1X|BUB3|EDEM3|USP25|UBE2I|HSPA5|USP20|USP21|EDEM1|AMFR|US…
9057	1.5765e-19	2.1046e-17	92	503	macromolecule catabolic process	UFD1L|USP38|FAF1|USP33|NGLY1|PARK2|CASP8|PSMD2|PIM1|AKT1|SEC61B|FBXO8|GUSB|EPM2A|USP8|USP48|ENDOG|USP4|FBXO2|GAA|USP2|UBE4A|UBE4B|RAD23B|RBX1|PSMA5|PSMA6|AFG3L2|XRN1|TBL1XR1|TRAF6|XRN2|PSME2|PRKCQ|SQSTM1|DCP2|USP13|USP14|CUL7|USP15|TSG101|RPN2|USP10|DERL3|CUL3|USP11|RPN1|DERL1|CUL1|DERL2|PSEN1|RNF5|PSMA7|RELA|USP19|HSP90B1|ZMPSTE24|EXOSC7|PPP2CB|CCNB1|PSMB5|PCBP2|TBL1X|BUB3|EDEM3|USP25|MGAM|UBE2I…
6511	3.971e-19	5.1185e-17	64	277	ubiquitin-dependent protein catabolic process	UFD1L|USP38|FAF1|USP33|PARK2|PSMD2|SEC61B|FBXO8|EPM2A|USP8|USP48|USP4|FBXO2|USP2|UBE4A|UBE4B|RAD23B|RBX1|PSMA5|PSMA6|TBL1XR1|PSME2|SQSTM1|USP13|USP14|CUL7|USP15|TSG101|RPN2|USP10|DERL3|CUL3|USP11|RPN1|DERL1|CUL1|DERL2|RNF5|PSMA7|USP19|HSP90B1|PPP2CB|CCNB1|PSMB5|PCBP2|TBL1X|BUB3|EDEM3|USP25|UBE2I|HSPA5|USP20|USP21|EDEM1|AMFR|USP22|SYVN1|UBE2G1|UBE2G2|PSMC6|NPLOC4|MDM2|STUB1|FBXL4
16192	2.8311e-18	3.5275e-16	99	589	vesicle-mediated transport	ITSN2|APP|KDELR1|ITSN1|FNBP1L|SCAMP5|RABGEF1|BCAP29|VPS35|RAB2B|PRKCI|FNBP1|COG5|TSC2|GAPVD1|KDELR2|AMPH|MPPE1|KDELR3|SQSTM1|RIN2|BLZF1|GRIA1|RTN3|COPB2|TMED10|COPB1|ARL1|VPS26A|ARHGAP17|PSEN1|CORO1A|CORO1C|SNX3|SNX4|SNX1|SNX2|RAB6A|TXNDC5|GOT1|RAB39B|EHD1|EHD2|EHD4|SYNJ1|PPT1|OSBPL1A|RAB5A|ARF3|ARF4|ARF1|USP33|AP2A1|RABEPK|RAB22A|HK2|HK1|ACTR1A|KIF1C|TMED2|SNAP29|DBNL|WIPI1|EPS15L1|ARFGAP3|ARFGA…
71216	4.2874e-18	5.1697e-16	26	50	cellular response to biotic stimulus	PPP1R15B|GSK3B|DERL3|DERL1|DERL2|RNF5|ERO1L|HERPUD1|CCND1|MAPK1|MAPK3|HSPA5|WFS1|EIF2AK1|AMFR|EIF2AK3|EIF2AK2|EIF2AK4|IFNG|VAPB|DDIT3|STUB1|ATF6|TP53|TLR4|NFE2L2
51234	8.7371e-17	1.0206e-14	273	2603	establishment of localization	ITSN2|SLC35B3|SLC35B2|APP|KDELR1|SLC35B1|ITSN1|FNBP1L|SCAMP5|RABGEF1|AKT1|BCAP29|VPS35|SLC12A6|SLC12A7|SEC63|PRKCI|COG6|FNBP1|COG5|GAPVD1|AR|SOAT2|KDELR2|MPPE1|KDELR3|ATP6V0D1|TP53|RIN2|VPS25|VPS28|CFTR|BLZF1|SEH1L|ABCB8|VPS26A|VPS26B|SNX3|SNX4|SNX1|SNX2|HMOX1|SSR1|SNX9|SNX7|ATG7|SNX8|SNX5|CHKA|SLC33A1|EIF2AK3|RAB39B|SLC16A10|EHD1|EHD2|EHD4|PPT1|CALR|ARF3|ARF4|RYR2|ARF1|CLIC4|ERO1LB|SRPR|SNX12|SN…
6810	1.0694e-16	1.2113e-14	270	2569	transport	ITSN2|SLC35B3|SLC35B2|APP|KDELR1|SLC35B1|ITSN1|FNBP1L|SCAMP5|RABGEF1|AKT1|BCAP29|VPS35|SLC12A6|SLC12A7|SEC63|PRKCI|COG6|FNBP1|COG5|GAPVD1|AR|SOAT2|KDELR2|MPPE1|KDELR3|ATP6V0D1|TP53|RIN2|VPS25|VPS28|CFTR|BLZF1|SEH1L|ABCB8|VPS26A|VPS26B|SNX3|SNX4|SNX1|SNX2|HMOX1|SSR1|SNX9|SNX7|ATG7|SNX8|SNX5|CHKA|SLC33A1|EIF2AK3|RAB39B|SLC16A10|EHD1|EHD2|EHD4|PPT1|CALR|ARF3|ARF4|RYR2|ARF1|CLIC4|ERO1LB|SRPR|SNX12|SN…
34620	1.5426e-16	1.6475e-14	17	22	cellular response to unfolded protein	HSPA5|EIF2AK1|DERL3|AMFR|EIF2AK3|DERL1|EIF2AK2|DERL2|EIF2AK4|ERO1L|HERPUD1|CCND1|IFNG|VAPB|DDIT3|ATF6|NFE2L2
30968	1.5426e-16	1.6475e-14	17	22	endoplasmic reticulum unfolded protein response	HSPA5|EIF2AK1|DERL3|AMFR|EIF2AK3|DERL1|EIF2AK2|DERL2|EIF2AK4|ERO1L|HERPUD1|CCND1|IFNG|VAPB|DDIT3|ATF6|NFE2L2
44248	1.5639e-15	1.6238e-13	112	776	cellular catabolic process	ALDH1L2|PARK2|LAMP1|PSMD2|PIM1|FBXO8|EPM2A|USP8|ENDOG|ENTPD3|ENTPD4|USP4|FBXO2|USP2|UBE4A|UBE4B|SDHD|RBX1|XRN1|TBL1XR1|XRN2|PSME2|PRKCQ|SQSTM1|CUL7|TSG101|RPN2|CUL3|RPN1|CUL1|PSEN1|HSP90B1|ZMPSTE24|PRDX3|PRDX2|CCNB1|PRDX1|PCBP2|HMOX1|ASL|ATG7|ATG5|EDEM3|UBE2I|GOT1|HSPA5|EDEM1|GOT2|NFKB1|CDK7|NPLOC4|MDM2|PPT1|CYCS|TPP1|ATM|FBXL4|UFD1L|ACADVL|USP38|FAF1|USP33|MAP1LC3B|MAP1LC3A|CASP8|SEC61B|CTSD|HIB…
6468	3.7324e-15	3.7707e-13	99	654	protein amino acid phosphorylation	APP|ARAF|COL4A3BP|SLK|PIM1|AKT1|NEK1|PIM3|NEK2|PIM2|EIF2A|CDKL2|PDGFRB|MAP2K4|CSNK1G3|PRKCI|PRKCH|CSNK2A1|DAPK3|PRKCD|PRKCQ|PRKD2|CSNK1G2|CDKL1|SHC1|STK39|PSEN1|STK4|STK3|PRDX2|STK33|PRDX4|NUAK2|MAP2K7|MARK4|MARK3|MARK2|NEK8|SRPK2|NEK9|NEK4|EIF2AK1|NEK7|EIF2AK3|EIF2AK2|EIF2AK4|EIF2S1|CDK7|CDK6|STK24|STK25|CDK4|BCL2|CDK10|ATM|ATR|GSK3B|PRKAG1|PIK3CB|PIK3CG|IKBKB|EEF2K|DBNL|CAMK1D|OXSR1|MASTL|GAK|I…
51179	3.8948e-15	3.8312e-13	296	2976	localization	ITSN2|SLC35B3|ATF2|SLC35B2|APP|KDELR1|SLC35B1|ITSN1|FNBP1L|SCAMP5|RABGEF1|AKT1|BCAP29|VPS35|SLC12A6|SLC12A7|SEC63|PRKCI|COG6|FNBP1|COG5|GAPVD1|AR|SOAT2|KDELR2|MPPE1|KDELR3|TLN1|ATP6V0D1|TP53|RIN2|VPS25|VPS28|CFTR|BLZF1|SEH1L|ABCB8|VPS26A|VPS26B|SNX3|SNX4|SNX1|SNX2|HMOX1|SSR1|SNX9|SNX7|ATG7|SNX8|SNX5|CHKA|SLC33A1|EIF2AK3|RAB39B|SLC16A10|EHD1|EHD2|EHD4|PPT1|CALR|ARF3|ARF4|RYR2|ARF1|CLIC4|ERO1LB|GPA…
6996	9.9318e-15	9.5192e-13	165	1378	organelle organization	FHOD3|FOXA1|TRRAP|EHMT2|FHOD1|HDAC11|ETS1|COL4A3BP|PIM1|AKT1|NEK1|SMARCAD1|NEK2|PIM2|WHSC1L1|EIF2A|TSPYL2|USP8|PRKCI|DAPK3|RPS6|TOMM34|FOXP3|CDC25A|CDC25B|DAAM1|TBL1XR1|TFAM|TLN1|TP53|BLZF1|HIST1H2BC|COPB2|RAB5B|SEH1L|CUL3|COPB1|ARL1|HTRA2|ARHGAP17|PSEN1|CORO1A|PHF21A|HSP90B1|ZMPSTE24|NCKIPSD|PRDX3|VCPIP1|CCNB1|NUAK2|EP400|MARK4|ATG5|NEK8|NEK9|CREBBP|UBE2I|NEK4|H3F3A|EIF2AK3|SMARCA5|SYNJ2|CORO2B|…
6793	1.2505e-14	1.1401e-12	126	947	phosphorus metabolic process	APP|ARAF|CDC14A|COL4A3BP|SLK|PIM1|AKT1|NEK1|PIM3|NEK2|PIM2|EIF2A|EPM2A|CDKL2|PDGFRB|MAP2K4|CSNK1G3|PRKCI|PRKCH|CSNK2A1|DAPK3|PRKCD|OCRL|CDC25A|CDC25B|PRKCQ|PRKD2|ATP6V0D1|CSNK1G2|CDKL1|SHC1|STK39|PSEN1|STK4|STK3|PRDX2|STK33|PRDX4|NUAK2|INPP5F|MAP2K7|MARK4|MARK3|MARK2|NEK8|SRPK2|NEK9|NEK4|EIF2AK1|NEK7|EIF2AK3|EIF2AK2|EIF2AK4|SYNJ2|EIF2S1|CDK7|CDK6|STK24|SYNJ1|STK25|CDK4|BCL2|CDK10|ATM|ATR|GSK3B|PR…
6796	1.2505e-14	1.1401e-12	126	947	phosphate metabolic process	APP|ARAF|CDC14A|COL4A3BP|SLK|PIM1|AKT1|NEK1|PIM3|NEK2|PIM2|EIF2A|EPM2A|CDKL2|PDGFRB|MAP2K4|CSNK1G3|PRKCI|PRKCH|CSNK2A1|DAPK3|PRKCD|OCRL|CDC25A|CDC25B|PRKCQ|PRKD2|ATP6V0D1|CSNK1G2|CDKL1|SHC1|STK39|PSEN1|STK4|STK3|PRDX2|STK33|PRDX4|NUAK2|INPP5F|MAP2K7|MARK4|MARK3|MARK2|NEK8|SRPK2|NEK9|NEK4|EIF2AK1|NEK7|EIF2AK3|EIF2AK2|EIF2AK4|SYNJ2|EIF2S1|CDK7|CDK6|STK24|SYNJ1|STK25|CDK4|BCL2|CDK10|ATM|ATR|GSK3B|PR…
6508	1.6697e-14	1.486e-12	105	730	proteolysis	PARK2|CNDP2|CAPNS1|PSMD2|PIM1|CAPN2|FBXO3|CAPN1|FBXO8|EPM2A|USP8|USP4|FBXO2|USP2|UBE4A|UBE4B|RBX1|AFG3L2|TBL1XR1|PSME2|PRKCQ|SQSTM1|CUL7|TSG101|RPN2|CUL3|RPN1|CUL1|HTRA2|PSEN1|HSP90B1|ZMPSTE24|DPP3|CCNB1|PCBP2|RCE1|EDEM3|UBE2I|HSPA5|EDEM1|NFKB1|NPLOC4|MDM2|TPP1|FBXL2|FBXL4|UFD1L|PCSK2|PCSK1|USP38|FAF1|USP33|PCSK6|HK2|HK1|CASP9|CASP7|CASP12|CASP8|CASP4|CASP2|SEC61B|CTSD|USP48|RAD23B|SENP1|PSMA5|PS…
10941	1.7761e-14	1.544e-12	118	866	regulation of cell death	FOXA1|ATF2|APP|PDCD6|ITSN1|FAIM2|ETS1|PARK2|PIM1|AKT1|PIM3|PIM2|PDIA3|PRKCI|ENDOG|DAPK3|RPS6|RRAGA|CFDP1|DDIT3|SQSTM1|TP53|CERKL|CUL3|CUL1|HTRA2|PSEN1|STK4|RTN4|HSP90B1|STK3|PRDX3|PRDX2|PRDX5|BCL2L11|NUAK2|PRDX1|BAG1|HMOX1|MARK4|ATG5|TXNDC5|MCL1|PRNP|HSPA5|WFS1|ZBTB16|EIF2AK3|ASNS|BFAR|ESR1|NFKB1|IL6|PPT1|BCL2|CYCS|ATM|CALR|SERINC3|GSK3B|RYR2|FAF1|HSPB1|HMGB1|PCSK6|PIK3CG|ARHGAP4|HERPUD1|IKBKB|CA…
43067	2.3952e-14	2.0348e-12	117	859	regulation of programmed cell death	FOXA1|ATF2|APP|PDCD6|ITSN1|FAIM2|ETS1|PARK2|PIM1|AKT1|PIM3|PIM2|PDIA3|PRKCI|ENDOG|DAPK3|RPS6|CFDP1|DDIT3|SQSTM1|TP53|CERKL|CUL3|CUL1|HTRA2|PSEN1|STK4|RTN4|HSP90B1|STK3|PRDX3|PRDX2|PRDX5|BCL2L11|NUAK2|PRDX1|BAG1|HMOX1|MARK4|ATG5|TXNDC5|MCL1|PRNP|HSPA5|WFS1|ZBTB16|EIF2AK3|ASNS|BFAR|ESR1|NFKB1|IL6|PPT1|BCL2|CYCS|ATM|CALR|SERINC3|GSK3B|RYR2|FAF1|HSPB1|HMGB1|PCSK6|PIK3CG|ARHGAP4|HERPUD1|IKBKB|CASP9|SM…
23034	2.7754e-14	2.3055e-12	144	1155	intracellular signaling pathway	IRS1|ITSN1|ARAF|ERO1L|SLK|CCND1|AKT1|TRIM23|EIF2A|RAB2B|MAP2K4|PRKCI|PRKCH|DAPK3|PRKCD|RPS6|TSC2|AR|RAB30|RAB36|RRAGC|CCNE1|DDIT3|PRKCQ|PRKD2|ATF6|SQSTM1|TP53|RIN2|ARL8B|IFNAR1|RAB5B|SHC1|INSIG2|ARL1|ARL2|ADRB1|PSEN1|STK4|SLC9A1|STK3|PRDX2|PRDX4|HMOX1|SCAP|RAB6A|MAP2K7|MARK2|SRPK2|RAB4A|HSPA5|WFS1|EIF2AK1|EIF2AK3|EIF2AK2|RAB39B|EIF2AK4|ESR1|CDK7|HIST1H4H|ATM|CALR|CNIH3|RAB5A|NFE2L2|ATR|ARF3|ARF4|…
42981	2.97e-14	2.4135e-12	116	851	regulation of apoptosis	FOXA1|ATF2|APP|PDCD6|ITSN1|FAIM2|ETS1|PARK2|PIM1|AKT1|PIM3|PIM2|PDIA3|PRKCI|ENDOG|DAPK3|RPS6|CFDP1|DDIT3|SQSTM1|TP53|CERKL|CUL3|CUL1|HTRA2|PSEN1|STK4|RTN4|HSP90B1|STK3|PRDX3|PRDX2|PRDX5|BCL2L11|NUAK2|PRDX1|BAG1|HMOX1|ATG5|TXNDC5|MCL1|PRNP|HSPA5|WFS1|ZBTB16|EIF2AK3|ASNS|BFAR|ESR1|NFKB1|IL6|PPT1|BCL2|CYCS|ATM|CALR|SERINC3|GSK3B|RYR2|FAF1|HSPB1|HMGB1|PCSK6|PIK3CG|ARHGAP4|HERPUD1|IKBKB|CASP9|SMPD2|CA…
16044	1.4022e-13	1.1152e-11	67	382	cellular membrane organization	ITSN2|ATF2|APP|ARF1|USP33|ITSN1|AP2A1|TAZ|FNBP1L|RABEPK|RAB22A|HK2|RABGEF1|DNM1L|SNAP29|HSP90AA1|PRKCI|DBNL|FNBP1|TSC2|EPS15L1|GAPVD1|ARFGAP1|DNM1|DNM3|DNAJC6|AMPH|TP53|RIN2|GRIA1|COPB2|GOSR2|COPB1|CORO1A|CORO1C|ZMPSTE24|SNX3|SNX4|VCPIP1|SNX1|SNX2|LMNA|BNIP1|BAK1|BID|ATG7|EPS15|TXNDC5|SEC24B|SEC24A|USP20|GBF1|GTF2H2|ARCN1|SOD1|EHD1|EHD2|EHD4|NPLOC4|SYNJ1|PPT1|BCL2|TRIP10|BAX|SEC24D|SEC24C|RAB5A
61024	1.5943e-13	1.2415e-11	67	383	membrane organization	ITSN2|ATF2|APP|ARF1|USP33|ITSN1|AP2A1|TAZ|FNBP1L|RABEPK|RAB22A|HK2|RABGEF1|DNM1L|SNAP29|HSP90AA1|PRKCI|DBNL|FNBP1|TSC2|EPS15L1|GAPVD1|ARFGAP1|DNM1|DNM3|DNAJC6|AMPH|TP53|RIN2|GRIA1|COPB2|GOSR2|COPB1|CORO1A|CORO1C|ZMPSTE24|SNX3|SNX4|VCPIP1|SNX1|SNX2|LMNA|BNIP1|BAK1|BID|ATG7|EPS15|TXNDC5|SEC24B|SEC24A|USP20|GBF1|GTF2H2|ARCN1|SOD1|EHD1|EHD2|EHD4|NPLOC4|SYNJ1|PPT1|BCL2|TRIP10|BAX|SEC24D|SEC24C|RAB5A
43161	1.6743e-13	1.2517e-11	37	140	proteasomal ubiquitin-dependent protein catabolic process	RPN2|DERL3|CUL3|FAF1|RPN1|DERL1|CUL1|DERL2|RNF5|PSMA7|USP19|HSP90B1|PPP2CB|CCNB1|PSMB5|PSMD2|PCBP2|SEC61B|TBL1X|BUB3|EDEM3|EPM2A|HSPA5|EDEM1|FBXO2|AMFR|SYVN1|UBE2G2|RAD23B|RBX1|PSMA5|PSMA6|PSMC6|NPLOC4|TBL1XR1|PSME2|STUB1
10498	1.6743e-13	1.2517e-11	37	140	proteasomal protein catabolic process	RPN2|DERL3|CUL3|FAF1|RPN1|DERL1|CUL1|DERL2|RNF5|PSMA7|USP19|HSP90B1|PPP2CB|CCNB1|PSMB5|PSMD2|PCBP2|SEC61B|TBL1X|BUB3|EDEM3|EPM2A|HSPA5|EDEM1|FBXO2|AMFR|SYVN1|UBE2G2|RAD23B|RBX1|PSMA5|PSMA6|PSMC6|NPLOC4|TBL1XR1|PSME2|STUB1
9056	2.1733e-13	1.5929e-11	128	1006	catabolic process	ALDH1L2|PARK2|LAMP1|PSMD2|PIM1|AKT1|FBXO8|EPM2A|USP8|ENDOG|ENTPD3|ENTPD4|USP4|FBXO2|USP2|TALDO1|UBE4A|UBE4B|SDHD|PGD|RBX1|AFG3L2|XRN1|TBL1XR1|XRN2|PSME2|PRKCQ|SQSTM1|CUL7|TSG101|RPN2|CUL3|RPN1|CUL1|PSEN1|PLA2G6|HSP90B1|ZMPSTE24|PRDX3|PRDX2|CCNB1|LDHA|PRDX1|PCBP2|HMOX1|ASL|ATG7|ATG5|EDEM3|MGAM|UBE2I|GOT1|HSPA5|EDEM1|GOT2|NFKB1|CDK7|NPLOC4|MDM2|PPT1|CYCS|TPP1|ATM|FBXL4|UFD1L|ACADVL|USP38|FAF1|USP33…
33554	3.3737e-13	2.4252e-11	91	620	cellular response to stress	GSK3B|CLPB|HMGB1|ERO1L|HERPUD1|SCAMP5|COL4A3BP|SLK|MAP1LC3A|CCND1|CREB3L2|PIM1|CTSD|EIF2A|MAP2K4|DBNL|SPHK1|H2AFX|SIRT1|RAD23B|RBX1|IFNG|DDIT3|TRAF6|CAT|ATF6|SQSTM1|TP53|ATF4|PPP1R15B|HDAC2|DHX9|INSIG2|USP10|DERL3|DERL1|DERL2|PSEN1|RNF5|PRDX3|ATXN3|PRDX2|MAPK9|PAK1|PRDX5|MAPK8|NUAK2|PRDX1|POLD2|RPS3|HMOX1|SCAP|MAPK1|RBBP7|MAP2K7|MAP4K5|MAP4K3|ATG5|MAPK3|EIF2B5|EIF2B4|TRAP1|POLQ|HSPA1L|HSPA5|POLN|…
46907	1.2715e-12	8.9678e-11	94	665	intracellular transport	SLC25A1|APP|RYR2|ARF1|KDELR1|SRPR|ATP2A2|AP2A1|DBI|HK2|HK1|PPP3CA|SEC61G|AKT1|BCAP29|KIF1C|KIF1B|VPS35|KIF1A|SEC61B|SEC63|PDIA3|HSP90AA1|PRKCI|SSR4|COG5|SSR2|SSR3|TAP2|TOMM34|TAP1|TSC2|WIPI1|ARFGAP3|ARFGAP1|TOM1L2|RER1|IFNG|DNAJC6|ERP29|SCG5|KDELR2|MPPE1|SQSTM1|TP53|CHMP7|BLZF1|RBM22|COPB2|TMED10|STX16|GOSR2|VPS4B|COPB1|VPS4A|ARL1|DERL1|DERL2|VPS26A|PSEN1|VPS26B|ATP2C1|NCKIPSD|GGA1|LMAN1|SNX1|SNX…
51641	1.4493e-12	1.0032e-10	123	977	cellular localization	APP|KDELR1|SCAMP5|AKT1|BCAP29|VPS35|SEC63|PDIA3|PRKCI|DGAT1|USP4|COG5|TAP2|TOMM34|TAP1|TSC2|PDIA4|TOM1L2|ERP29|SCG5|KDELR2|MPPE1|KDELR3|TLN1|SQSTM1|TP53|BLZF1|COPB2|TMED10|SEH1L|COPB1|ARL1|VPS26A|ARHGAP17|PSEN1|VPS26B|NCKIPSD|SNX1|CCNB1|SNX2|SSR1|SNX9|TXNDC5|ZBTB16|EIF2AK3|SYNJ2|EHD1|IL6|MDM2|BCL2|TPP1|CALR|SLC25A1|RYR2|ARF1|GPAA1|FAF1|SRPR|ATP2A2|AP2A1|DBI|PCSK6|RABEPK|HK2|HK1|PPP3CA|SEC61G|KIF1…
16310	1.6123e-12	1.0958e-10	105	783	phosphorylation	APP|ARAF|COL4A3BP|SLK|PIM1|AKT1|NEK1|PIM3|NEK2|PIM2|EIF2A|CDKL2|PDGFRB|MAP2K4|CSNK1G3|PRKCI|PRKCH|CSNK2A1|DAPK3|PRKCD|PRKCQ|PRKD2|ATP6V0D1|CSNK1G2|CDKL1|SHC1|STK39|PSEN1|STK4|STK3|PRDX2|STK33|PRDX4|NUAK2|MAP2K7|MARK4|MARK3|MARK2|NEK8|SRPK2|NEK9|NEK4|EIF2AK1|NEK7|EIF2AK3|EIF2AK2|EIF2AK4|EIF2S1|CDK7|CDK6|STK24|STK25|CDK4|BCL2|CDK10|ATM|ATR|GSK3B|PRKAG1|PIK3CB|TAZ|PIK3C2A|PIK3CG|HK2|IKBKB|EEF2K|DBNL…
16043	3.4848e-12	2.3261e-10	252	2557	cellular component organization	ITSN2|ATF2|APP|TRRAP|EHMT2|ITSN1|HDAC11|FNBP1L|ACTB|RABGEF1|AKT1|EIF2A|TSPYL2|PRKCI|ENDOG|FNBP1|DAPK3|GAPVD1|AFG3L2|DAAM1|SOAT2|CSNK2B|XRN2|TFAM|HPRT1|TLN1|TP53|RIN2|BLZF1|SEH1L|ZMPSTE24|SNX3|PRDX3|SNX4|SNX1|SNX2|NUAK2|RDH12|HMOX1|ASL|ATG7|ATG5|SRPK2|CREBBP|H3F3A|EIF2AK3|SMARCA5|RAB39B|EHD1|EHD2|EHD4|NPLOC4|PPT1|HIST1H4H|CALR|EZH1|RCOR1|ATR|SUV39H2|ARF1|SETD2|ECM2|GPAA1|SUV39H1|PRKAG1|AP2A1|RAB22…
16265	5.1298e-12	3.3641e-10	96	702	death	APP|PIGT|PDCD6|FAF1|ITSN1|HSPB1|FAIM2|DBI|PARK7|ARHGAP4|CASP9|CASP7|SLK|HINT2|CASP8|CASP4|AKT1|BCAP29|CASP2|PIM2|CHAC1|DNM1L|CTSD|ENDOG|TBP|PDCD6IP|DAPK3|RPS6|UBE4B|TRAF2|TNFRSF1A|SENP1|AR|AFG3L2|RRAGA|RRAGC|IFNG|DAD1|TRAF6|SQSTM1|TP53|ARF6|RTN3|ROCK1|DCTN1|CUL1|ITPR1|HTRA2|PSEN1|PLA2G6|RTN4|FGD1|FGD3|ATXN3|PAK1|MAPK8|BCL2L11|BAG5|MAPK7|BAG2|BAG1|UBQLN1|BNIP1|RPS3|HMOX1|BAK1|BID|PAK3|PAK2|BUB1|MC…
51649	6.1529e-12	3.9108e-10	111	865	establishment of localization in cell	APP|KDELR1|SCAMP5|AKT1|BCAP29|VPS35|SEC63|PDIA3|PRKCI|DGAT1|COG5|TAP2|TOMM34|TAP1|TSC2|PDIA4|TOM1L2|ERP29|SCG5|KDELR2|MPPE1|SQSTM1|TP53|BLZF1|COPB2|TMED10|SEH1L|COPB1|ARL1|VPS26A|ARHGAP17|PSEN1|VPS26B|NCKIPSD|SNX1|CCNB1|SNX2|SSR1|SNX9|TXNDC5|EIF2AK3|EHD1|IL6|BCL2|TPP1|CALR|SLC25A1|RYR2|ARF1|SRPR|ATP2A2|AP2A1|DBI|PCSK6|RABEPK|HK2|HK1|PPP3CA|SEC61G|KIF1C|KIF1B|KIF1A|SEC61B|SNAP29|HSP90AA1|SSR4|SSR2…
43066	6.1727e-12	3.9108e-10	63	376	negative regulation of apoptosis	FOXA1|ATF2|GSK3B|ITSN1|HSPB1|FAIM2|PCSK6|PIK3CG|IKBKB|PIM1|AKT1|PIM3|PIM2|PRKCI|SPHK1|RPS6|CFDP1|COL2A1|DAD1|DNAJC5|TRAF6|CAT|SQSTM1|TP53|BIRC3|CERKL|CEBPB|HDAC3|ROCK1|HDAC1|FURIN|PSEN1|RELA|HSP90B1|PRDX3|PRDX2|PPP2CB|PRDX5|MAPK8|NUAK2|BAG1|BNIP1|HMOX1|ATG5|TXNDC5|MCL1|PRNP|HSPA5|WFS1|ASNS|BFAR|CFLAR|ESR1|NFKB1|SOD1|IL6|DNAJA3|PPT1|BCL2|CTNNB1|BAX|ATM|HSPA1B
8219	8.1096e-12	5.0523e-10	95	697	cell death	APP|PIGT|PDCD6|FAF1|ITSN1|HSPB1|FAIM2|DBI|PARK7|ARHGAP4|CASP9|CASP7|SLK|HINT2|CASP8|CASP4|AKT1|BCAP29|CASP2|PIM2|CHAC1|DNM1L|CTSD|ENDOG|TBP|PDCD6IP|DAPK3|RPS6|UBE4B|TRAF2|TNFRSF1A|SENP1|AR|RRAGA|RRAGC|IFNG|DAD1|TRAF6|SQSTM1|TP53|ARF6|RTN3|ROCK1|DCTN1|CUL1|ITPR1|HTRA2|PSEN1|PLA2G6|RTN4|FGD1|FGD3|ATXN3|PAK1|MAPK8|BCL2L11|BAG5|MAPK7|BAG2|BAG1|UBQLN1|BNIP1|RPS3|HMOX1|BAK1|BID|PAK3|PAK2|BUB1|MCL1|BCAP…
51246	9.2772e-12	5.685e-10	89	636	regulation of protein metabolic process	APP|HSP90AB1|FAF1|HSPB1|TAZ|PARK2|RPS4X|UBL5|CCND1|PSMD2|SUMO2|AKT1|NCK1|EIF2A|EPM2A|PDGFRB|EIF5B|DBNL|USP4|SPHK1|PRKCD|TRAF2|PAX5|FOXP3|PSMA5|PSMA6|IFNG|TRAF6|NDUFS4|PSME2|HCLS1|TP53|TLR4|VPS28|PPP1R15B|HDAC2|TSG101|RPN2|RPN1|CUL1|FURIN|PSEN1|UBE2J2|PSMA7|RELA|UBE2J1|PAK1|CCNB1|PSMB5|BAG5|RNF139|RAB23|IGF2BP1|UBQLN1|MAPK1|BUB3|MAP4K5|ATG7|ATG5|UBE2F|EIF2B5|EIF2B4|UBE2I|HSPA5|WFS1|EIF2AK1|EIF2AK3…
60548	9.5088e-12	5.7329e-10	64	389	negative regulation of cell death	FOXA1|ATF2|GSK3B|ITSN1|HSPB1|FAIM2|PCSK6|PIK3CG|PARK2|IKBKB|PIM1|AKT1|PIM3|PIM2|PRKCI|SPHK1|RPS6|CFDP1|COL2A1|DAD1|DNAJC5|TRAF6|CAT|SQSTM1|TP53|BIRC3|CERKL|CEBPB|HDAC3|ROCK1|HDAC1|FURIN|PSEN1|RELA|HSP90B1|PRDX3|PRDX2|PPP2CB|PRDX5|MAPK8|NUAK2|BAG1|BNIP1|HMOX1|ATG5|TXNDC5|MCL1|PRNP|HSPA5|WFS1|ASNS|BFAR|CFLAR|ESR1|NFKB1|SOD1|IL6|DNAJA3|PPT1|BCL2|CTNNB1|BAX|ATM|HSPA1B
43069	1.112e-11	6.5979e-10	63	381	negative regulation of programmed cell death	FOXA1|ATF2|GSK3B|ITSN1|HSPB1|FAIM2|PCSK6|PIK3CG|IKBKB|PIM1|AKT1|PIM3|PIM2|PRKCI|SPHK1|RPS6|CFDP1|COL2A1|DAD1|DNAJC5|TRAF6|CAT|SQSTM1|TP53|BIRC3|CERKL|CEBPB|HDAC3|ROCK1|HDAC1|FURIN|PSEN1|RELA|HSP90B1|PRDX3|PRDX2|PPP2CB|PRDX5|MAPK8|NUAK2|BAG1|BNIP1|HMOX1|ATG5|TXNDC5|MCL1|PRNP|HSPA5|WFS1|ASNS|BFAR|CFLAR|ESR1|NFKB1|SOD1|IL6|DNAJA3|PPT1|BCL2|CTNNB1|BAX|ATM|HSPA1B
32268	9.9276e-11	5.7983e-09	79	560	regulation of cellular protein metabolic process	APP|HSP90AB1|HSPB1|TAZ|PARK2|RPS4X|UBL5|CCND1|PSMD2|SUMO2|AKT1|NCK1|EIF2A|EPM2A|PDGFRB|EIF5B|DBNL|USP4|SPHK1|PRKCD|TRAF2|PAX5|FOXP3|PSMA5|PSMA6|IFNG|TRAF6|NDUFS4|PSME2|HCLS1|TP53|TLR4|VPS28|PPP1R15B|HDAC2|RPN2|RPN1|CUL1|FURIN|PSEN1|PSMA7|PAK1|CCNB1|PSMB5|BAG5|RNF139|RAB23|IGF2BP1|UBQLN1|MAPK1|BUB3|MAP4K5|ATG7|ATG5|EIF2B5|EIF2B4|HSPA5|EIF2AK1|EIF2AK3|SAMD4A|MRE11A|EIF2AK4|PA2G4|EIF2S1|NFKB1|IL6|PS…
65007	2.5263e-10	1.4528e-08	552	6929	biological regulation	ITSN2|ATF2|TRRAP|ITSN1|ARAF|SCAMP5|CAPNS1|CREB3L3|PSMD2|MYC|CREB3L2|AKT1|TSPYL2|PRKCI|ENDOG|PRKCH|CSNK2A1|STARD8|DAPK3|PRKCD|LDOC1|GAPVD1|HCFC2|HCFC1|AR|DDIT3|PSME2|ATF7|PRKCQ|HPRT1|ATF6|VPS25|ATF3|VPS28|ATF4|ZNF276|SEH1L|RPN2|RPN1|PRDM10|PRDX3|PRDX2|PRDX5|PRDX4|RDH12|RDH11|PRDX1|HMOX1|SSR1|ZNF148|ATG7|ATG5|CREBBP|STARD13|EIF2AK1|SNAI3|EIF2AK3|EIF2AK2|EIF2AK4|PA2G4|FOSL2|EHD1|EHD4|REL|PPT1|CDK10|…
42221	3.5476e-10	2.0092e-08	157	1464	response to chemical stimulus	FOXA1|IRS1|PDCD6|CPOX|PARK7|ETS1|ACTB|ERO1L|SLK|CCND1|CREB3L3|MYC|CREB3L2|PIM1|CAPN2|AKT1|CHAC1|PDGFRB|IGFBP1|PRKCI|ENDOG|ENTPD6|TSC2|ATP1B1|AR|SOAT2|CCNE1|DDIT3|PRKCQ|CYP2E1|ATF6|TP53|CFTR|SHC1|PEF1|HSPA4L|ITPR1|PSEN1|UBE2J2|CORO1A|NDRG1|ADIPOR2|HSP90B1|SLC9A1|PRDX3|PRDX2|CCNB1|PRDX5|PRDX1|HMOX1|SCAP|MARK2|ATG5|PCK2|MCL1|EDEM3|EIF2B5|PRNP|EIF2B4|TRAP1|CREBBP|VCAM1|TOR1A|GOT1|HSPA5|EIF2AK1|EDEM1|…
6950	3.7965e-10	2.1181e-08	182	1773	response to stress	CLPB|PARK7|ERO1L|SCAMP5|COL4A3BP|SLK|CCND1|CREB3L3|CREB3L2|PIM1|CAPN2|AKT1|CHAC1|EIF2A|IGFBP1|MAP2K4|TAP1|TSC2|ATP1B1|RBX1|AR|DDIT3|PLAA|PRKCQ|ATF6|SQSTM1|TP53|ATF4|IFNAR1|HIST1H2BC|RTN3|PXK|DHX9|INSIG2|HSPA4L|STK39|ITPR1|HTRA2|ADRB1|NRF1|PSEN1|UBE2J2|CORO1A|HSP90B1|PRDX3|ATXN3|PRDX2|CCNB1|PRDX5|NUAK2|PRDX1|PCBP2|HMOX1|SCAP|ZNF148|MAP2K7|MARK2|ATG5|EDEM3|EIF2B5|PRNP|EIF2B4|TRAP1|CREBBP|VCAM1|TOR1…
10033	4.2351e-10	2.3281e-08	106	870	response to organic substance	FOXA1|IRS1|ERO1L|SLK|CCND1|CREB3L3|CREB3L2|AKT1|CHAC1|IGFBP1|PRKCI|ENDOG|AR|CCNE1|DDIT3|PRKCQ|CYP2E1|ATF6|CFTR|SHC1|HSPA4L|UBE2J2|CORO1A|ADIPOR2|HSP90B1|SLC9A1|PRDX3|PRDX2|CCNB1|HMOX1|SCAP|PCK2|MCL1|EDEM3|EIF2B5|EIF2B4|TOR1A|GOT1|HSPA5|EIF2AK1|EDEM1|EDEM2|GOT2|EIF2AK3|EIF2AK2|ASNS|EIF2AK4|HSPA2|ESR1|IL6|SYNJ1|BCL2|NFE2L2|HERPUD2|PCSK1|RYR2|SETD2|HSP90AB1|HSPB1|HERPUD1|PPP3CA|CASP8|ALDH2|HSP90AA1|…
48522	4.4495e-10	2.4105e-08	200	2003	positive regulation of cellular process	ATF2|SLC35B2|APP|ITSN1|SCAMP5|CAPNS1|PSMD2|MYC|CREB3L2|AKT1|EIF2A|PRKCI|ENDOG|DAPK3|HCFC1|AR|RRAGA|DDIT3|PSME2|PRKCQ|HPRT1|ATF6|TP53|ATF3|ATF4|RPN2|RPN1|PRDX3|PRDX1|HMOX1|SSR1|SCAP|ZNF148|ATG7|CREBBP|EIF2AK3|FOSL2|REL|PPT1|ATM|CALR|ATR|PCSK1|RYR2|ECM2|FAF1|ARHGAP4|SMPD2|UBL5|SPHK1|TUBB|SIRT1|DUSP6|PSMA5|PSMA6|PAX8|HCLS1|TLR4|ARF6|DERL2|PSMA7|RELA|FGD1|FGD3|PSMC3IP|PSMB5|NSD1|RPS3|TBL1X|BID|PAK3|E…
44249	6.1774e-10	3.2987e-08	174	1684	cellular biosynthetic process	DPAGT1|ATP8A2|ATP8A1|TUSC3|GTF2B|CPOX|ZDHHC1|ETS1|UROD|RPL36AL|RPS18|NARS2|AKT1|CCRN4L|ALG8|ALG9|DGAT1|ALG6|ALG5|RPS6|GTF3A|SARS|ATP11C|ALG3|ATP11B|ALG12|PGD|ATP1B1|CDC25A|HCFC1|DPM1|AR|RRAGC|DDIT3|XRN2|TFAM|MPPE1|GCS1|HPRT1|ATP6V0D1|TP53|ATF3|SLC27A5|ATF4|RPN2|RPN1|NRF1|PSEN1|AK5|PLA2G6|ASL|ATG7|PCK2|EIF2B5|EIF2B4|ATP8B4|CHKB|PMM1|GOT1|CHKA|ATP8B2|ATP8B1|EIF2AK1|GOT2|SMARCA5|EIF2AK2|TRIP4|ASNS|M…
50789	1.0765e-09	5.6675e-08	523	6543	regulation of biological process	ITSN2|ATF2|TRRAP|ITSN1|ARAF|SCAMP5|CAPNS1|CREB3L3|PSMD2|MYC|CREB3L2|AKT1|TSPYL2|PRKCI|ENDOG|PRKCH|CSNK2A1|STARD8|DAPK3|PRKCD|LDOC1|GAPVD1|HCFC2|HCFC1|AR|DDIT3|PSME2|ATF7|PRKCQ|HPRT1|ATF6|VPS25|ATF3|VPS28|ATF4|ZNF276|RPN2|RPN1|PRDM10|PRDX3|PRDX2|PRDX5|PRDX4|PRDX1|HMOX1|SSR1|ZNF148|ATG7|ATG5|CREBBP|STARD13|EIF2AK1|SNAI3|EIF2AK3|EIF2AK2|EIF2AK4|PA2G4|FOSL2|EHD1|EHD4|REL|PPT1|CDK10|SERPINI1|EZH1|ARF3…
51716	1.1431e-09	5.9348e-08	115	988	cellular response to stimulus	CLPB|IRS1|ERO1L|SCAMP5|COL4A3BP|SLK|CCND1|CREB3L2|PIM1|AKT1|EIF2A|PDGFRB|IGFBP1|MAP2K4|PRKCI|RBX1|CCNE1|DDIT3|ATF6|SQSTM1|TP53|CFTR|ATF4|SHC1|DHX9|INSIG2|PSEN1|CORO1A|ADIPOR2|HSP90B1|PRDX3|ATXN3|PRDX2|CCNB1|PRDX5|LDHA|NUAK2|PRDX1|HMOX1|SCAP|MAP2K7|ATG5|EIF2B5|EIF2B4|TRAP1|GOT1|HSPA5|WFS1|EIF2AK1|EIF2AK3|EIF2AK2|ASNS|EIF2AK4|EIF2S1|SETX|IL6|CDK7|TDP1|BCL2|TPP1|ATM|NFE2L2|ATR|GSK3B|CLIC4|HMGB1|HERP…
6487	1.7384e-09	8.9016e-08	15	35	protein amino acid N-linked glycosylation	DPAGT1|ALG8|ALG6|RPN2|TUSC3|RPN1|ALG12|DDOST|MAN1A2|DAD1|STT3A|MAN1C1|STT3B|MAN1B1|GCS1
48518	2.099e-09	1.0603e-07	213	2207	positive regulation of biological process	ATF2|SLC35B2|APP|ITSN1|SCAMP5|CAPNS1|PSMD2|MYC|CREB3L2|AKT1|EIF2A|PRKCI|ENDOG|DAPK3|HCFC1|AR|RRAGA|DDIT3|PSME2|PRKCQ|HPRT1|ATF6|TP53|ATF3|CFTR|ATF4|RPN2|RPN1|PRDX3|PRDX1|HMOX1|SSR1|SCAP|ZNF148|ATG7|CREBBP|EIF2AK3|FOSL2|EHD1|REL|PPT1|ATM|CALR|ATR|PCSK1|RYR2|ECM2|FAF1|ARHGAP4|SMPD2|UBL5|SPHK1|TUBB|SIRT1|DUSP6|PSMA5|PSMA6|PAX8|HCLS1|TLR4|ARF6|DERL2|PSMA7|RELA|FGD1|FGD3|PSMC3IP|PSMB5|NSD1|RPS3|TBL1X|…
42592	2.2318e-09	1.1123e-07	95	772	homeostatic process	FOXA1|APP|RYR2|ACADVL|TUSC3|IRS1|ATP2A2|PIK3CB|PARK7|HK2|HERPUD1|IKBKB|PPP3CA|COL4A3BP|MYC|AKT1|SLC12A7|SLC39A4|KCNH2|PDGFRB|PDIA3|GAA|TRPC1|RPS6|TAP2|TAP1|BPGM|FOXP3|PDIA6|PDIA4|SLC9A2|AFG3L2|COL2A1|SLC9A6|IFNG|SOAT2|DDIT3|TRAF6|SLC9A9|HCLS1|TFF1|TLR4|CEBPG|DERL1|ITPR1|ADRB1|ATP1A2|SRI|PSEN1|ATP2C1|CORO1A|HSP90B1|SLC9A1|PRDX3|PRDX2|PRDX5|BCL2L11|PRDX4|PRDX1|ASNA1|HMOX1|BAK1|TXNDC5|MCL1|SLC12A2|E…
6915	2.454e-09	1.207e-07	76	567	apoptosis	APP|PIGT|PDCD6|ITSN1|FAIM2|DBI|ARHGAP4|CASP9|CASP7|SLK|HINT2|CASP8|CASP4|AKT1|BCAP29|CASP2|PIM2|CHAC1|DNM1L|ENDOG|PDCD6IP|DAPK3|RPS6|UBE4B|TRAF2|TNFRSF1A|SENP1|RRAGA|RRAGC|IFNG|DAD1|TRAF6|SQSTM1|TP53|ARF6|RTN3|ROCK1|CUL1|PSEN1|RTN4|FGD1|FGD3|PAK1|MAPK8|BCL2L11|BAG5|MAPK7|BAG2|BAG1|UBQLN1|BNIP1|RPS3|BAK1|BID|PAK3|PAK2|BUB1|MCL1|BCAP31|EGLN3|EIF2AK1|ZBTB16|EIF2AK3|EIF2AK2|BFAR|NFKB1|SGPP1|SOD1|IL6|…
12501	5.3741e-09	2.6089e-07	76	577	programmed cell death	APP|PIGT|PDCD6|ITSN1|FAIM2|DBI|ARHGAP4|CASP9|CASP7|SLK|HINT2|CASP8|CASP4|AKT1|BCAP29|CASP2|PIM2|CHAC1|DNM1L|ENDOG|PDCD6IP|DAPK3|RPS6|UBE4B|TRAF2|TNFRSF1A|SENP1|RRAGA|RRAGC|IFNG|DAD1|TRAF6|SQSTM1|TP53|ARF6|RTN3|ROCK1|CUL1|PSEN1|RTN4|FGD1|FGD3|PAK1|MAPK8|BCL2L11|BAG5|MAPK7|BAG2|BAG1|UBQLN1|BNIP1|RPS3|BAK1|BID|PAK3|PAK2|BUB1|MCL1|BCAP31|EGLN3|EIF2AK1|ZBTB16|EIF2AK3|EIF2AK2|BFAR|NFKB1|SGPP1|SOD1|IL6|…
65008	7.5748e-09	3.6301e-07	158	1540	regulation of biological quality	FOXA1|APP|KDELR1|TUSC3|IRS1|PARK7|PARK2|COL4A3BP|SLK|MYC|AKT1|SLC16A2|SLC12A7|SLC39A4|WHSC1L1|KCNH2|PDGFRB|TSPYL2|IGFBP1|PDIA3|DGAT1|USP4|PRKCD|RPS6|USP2|TAP2|TAP1|TSC2|FOXP3|PDIA6|PDIA4|SLC9A2|AR|AFG3L2|CFDP1|SLC9A6|RRAGC|SOAT2|DDIT3|SLC9A9|XRN2|SCG5|KDELR2|KDELR3|TLN1|TP53|IFNAR1|SEH1L|ITPR1|ADRB1|PSEN1|CORO1A|ADIPOR2|RTN4|HSP90B1|SLC9A1|PRDX3|PRDX2|PRDX5|BCL2L11|PRDX4|RDH12|RDH11|PRDX1|HMOX1|A…
50794	7.8422e-09	3.7106e-07	496	6213	regulation of cellular process	ITSN2|ATF2|TRRAP|ITSN1|ARAF|SCAMP5|CAPNS1|CREB3L3|PSMD2|MYC|CREB3L2|AKT1|TSPYL2|PRKCI|ENDOG|PRKCH|CSNK2A1|STARD8|DAPK3|PRKCD|LDOC1|GAPVD1|HCFC2|HCFC1|AR|DDIT3|PSME2|ATF7|PRKCQ|HPRT1|ATF6|VPS25|ATF3|VPS28|ATF4|ZNF276|RPN2|RPN1|PRDM10|PRDX3|PRDX2|PRDX5|PRDX4|PRDX1|HMOX1|SSR1|ZNF148|ATG7|ATG5|CREBBP|STARD13|EIF2AK1|SNAI3|EIF2AK3|EIF2AK2|EIF2AK4|PA2G4|FOSL2|EHD4|REL|PPT1|CDK10|SERPINI1|EZH1|ARF3|ARF4…
6916	8.9052e-09	4.1609e-07	37	199	anti-apoptosis	FOXA1|ATF2|CERKL|CEBPB|HDAC3|HDAC1|HSPB1|FAIM2|PSEN1|RELA|HSP90B1|IKBKB|PRDX2|BAG1|BNIP1|AKT1|HMOX1|PIM2|TXNDC5|MCL1|PRNP|PRKCI|HSPA5|SPHK1|BFAR|CFLAR|ESR1|NFKB1|SOD1|CFDP1|DAD1|TRAF6|BCL2|BAX|SQSTM1|HSPA1B|BIRC3
10942	9.6097e-09	4.4347e-07	63	448	positive regulation of cell death	FOXA1|APP|RYR2|PDCD6|FAF1|ITSN1|HMGB1|ETS1|ARHGAP4|SMPD2|CASP8|CASP4|AKT1|CASP2|PDIA3|ENDOG|TUBB|DAPK3|RPS6|TRAF2|RPS3A|DUSP6|SENP1|RRAGA|IFNG|TRAF3|DDIT3|TRAF6|SQSTM1|TP53|TLR4|CEBPB|CUL3|CEBPG|CUL1|HTRA2|PSEN1|STK4|FGD1|STK3|FGD3|MAPK9|MAPK8|BCL2L11|PRDX1|BNIP1|RPS3|HMOX1|MAPK1|BAK1|BID|PAK3|MARK4|ZBTB16|CFLAR|SOD1|DNAJA3|DLC1|BCL2|CTNNB1|BAX|ATM|SERINC3
7264	1.0528e-08	4.7992e-07	47	291	small GTPase mediated signal transduction	ARF3|ARF4|ARF1|RAB5B|ROCK1|SHC1|SRC|ITSN1|ARL1|ARL2|RAB22A|ARHGAP4|RAB21|ARFRP1|RAB20|RAB23|RAB24|HMOX1|MAPK1|PAK3|RAB6A|ARL5A|TRIM23|MAPK3|FARP2|RAB2B|RAB4A|DBNL|RAB39B|MAPK14|MAPK13|RAB11B|ARL4D|MAPK11|ARL4A|RAB30|RAB36|RAB14|RRAGC|DNAJA3|RAB17|TP53|RIN2|RAB5A|ARF5|ARF6|ARL8B
35556	1.0672e-08	4.806e-07	98	830	intracellular signal transduction	IRS1|ITSN1|SLK|AKT1|TRIM23|RAB2B|MAP2K4|DAPK3|RPS6|TSC2|RAB30|RAB36|RRAGC|TP53|RIN2|ARL8B|IFNAR1|RAB5B|SHC1|ARL1|ARL2|ADRB1|PSEN1|STK4|SLC9A1|STK3|PRDX2|PRDX4|HMOX1|RAB6A|MAP2K7|MARK2|SRPK2|RAB4A|EIF2AK3|RAB39B|HIST1H4H|RAB5A|ARF3|ARF4|ARF1|PRKCSH|FAF1|PIK3C2G|PIK3CB|TAZ|PIK3C2A|PIK3CG|RAB22A|ARHGAP4|IKBKB|SMPD2|ARL5A|DBNL|SPHK1|PLA2G4B|TRAF2|OXSR1|DUSP6|ARL4D|ARL4A|IFNG|TRAF6|NDUFS4|CKS2|PIK3C3|…
7049	1.1393e-08	5.0698e-07	95	797	cell cycle	SUV39H2|APP|SUV39H1|FOXM1|CDC14A|HK2|CKS1B|PPP3CA|UBL5|PPP6C|CCND1|PSMD2|MYC|PIM1|AKT1|NEK1|PIM3|NEK2|HORMAD2|PIM2|SKP2|USP8|PDCD6IP|TUBB|RPS6|USP2|H2AFX|CDC25A|CDC25B|PSMA5|GAK|PSMA6|CCNA1|ILF3|KIF2A|IFNG|CCNE1|DDIT3|CKS2|PSME2|KIF2C|TP53|ARL8B|TSG101|SEH1L|HDAC3|RPN2|DCTN1|CUL3|VPS4B|RPN1|VPS4A|CUL1|ARL2|CENPA|PSMA7|PPM1G|PSMC3IP|VCPIP1|CCNB1|PSMB5|MAPK7|RBBP4|KATNA1|MAPK1|BUB3|MAPK6|BUB1|MAPK4…
9058	1.4791e-08	6.4598e-07	177	1794	biosynthetic process	DPAGT1|ATP8A2|ATP8A1|TUSC3|GTF2B|CPOX|ZDHHC1|ALDH1L2|ETS1|UROD|RPL36AL|RPS18|NARS2|AKT1|CCRN4L|ALG8|ALG9|DGAT1|ALG6|ALG5|RPS6|GTF3A|SARS|ATP11C|ALG3|ATP11B|ALG12|PGD|ATP1B1|CDC25A|HCFC1|DPM1|AR|RRAGC|DDIT3|XRN2|TFAM|MPPE1|GCS1|HPRT1|ATP6V0D1|TP53|ATF3|SLC27A5|CFTR|ATF4|RPN2|RPN1|NRF1|PSEN1|AK5|PLA2G6|ASL|ATG7|PCK2|EIF2B5|EIF2B4|ATP8B4|CHKB|PMM1|GOT1|CHKA|ATP8B2|ATP8B1|EIF2AK1|GOT2|SMARCA5|EIF2AK2…
46474	1.4862e-08	6.4598e-07	20	70	glycerophospholipid biosynthetic process	PCYT1B|PIGT|ALG9|CHKB|CHKA|PIGN|GPAA1|PIGP|ALG12|PLA2G6|TAZ|AGPAT1|PIK3C2A|AGPAT2|DPM1|ETNK2|CHPT1|MPPE1|PIGL|PIGG
43068	1.6541e-08	7.1071e-07	62	444	positive regulation of programmed cell death	FOXA1|APP|RYR2|PDCD6|FAF1|ITSN1|HMGB1|ETS1|ARHGAP4|SMPD2|CASP8|CASP4|AKT1|CASP2|PDIA3|ENDOG|TUBB|DAPK3|RPS6|TRAF2|RPS3A|DUSP6|SENP1|IFNG|TRAF3|DDIT3|TRAF6|SQSTM1|TP53|TLR4|CEBPB|CUL3|CEBPG|CUL1|HTRA2|PSEN1|STK4|FGD1|STK3|FGD3|MAPK9|MAPK8|BCL2L11|PRDX1|BNIP1|RPS3|HMOX1|MAPK1|BAK1|BID|PAK3|MARK4|ZBTB16|CFLAR|SOD1|DNAJA3|DLC1|BCL2|CTNNB1|BAX|ATM|SERINC3
34613	1.6937e-08	7.1943e-07	61	434	cellular protein localization	KDELR1|GPAA1|SRPR|AP2A1|DBI|PPP3CA|SEC61G|AKT1|BCAP29|SEC61B|SEC63|PDIA3|PRKCI|SSR4|USP4|SSR2|SSR3|TAP2|TOMM34|TAP1|TSC2|ARFGAP3|ARFGAP1|TOM1L2|IFNG|ERP29|SCG5|KDELR2|KDELR3|TP53|BLZF1|RBM22|COPB2|STX16|COPB1|DERL1|DERL2|CENPA|NCKIPSD|GGA1|SNX1|SNX2|LMNA|SSR1|MAPK1|SNX9|BID|BCAP31|RANBP2|SEC24B|SEC24A|ZBTB16|ARCN1|TOMM70A|VPS41|MDM2|CTNNB1|TPP1|CALR|SEC24D|SEC24C
6886	1.9795e-08	8.3139e-07	54	365	intracellular protein transport	KDELR1|SRPR|AP2A1|DBI|PPP3CA|SEC61G|AKT1|BCAP29|SEC61B|SEC63|PDIA3|PRKCI|SSR4|SSR2|SSR3|TAP2|TOMM34|TAP1|TSC2|ARFGAP3|ARFGAP1|TOM1L2|IFNG|ERP29|SCG5|KDELR2|TP53|BLZF1|RBM22|COPB2|STX16|COPB1|DERL1|DERL2|NCKIPSD|GGA1|SNX1|SNX2|LMNA|SSR1|MAPK1|SNX9|BID|BCAP31|RANBP2|SEC24B|SEC24A|ARCN1|TOMM70A|VPS41|TPP1|CALR|SEC24D|SEC24C
6650	2.1085e-08	8.7572e-07	27	122	glycerophospholipid metabolic process	PIGT|PIGN|GPAA1|PIGP|PIK3CB|PLA2G6|TAZ|AGPAT1|PIK3C2A|AGPAT2|PIK3CG|INPP5F|PCYT1B|ALG9|CHKB|CHKA|PLA2G4B|OCRL|ALG12|SYNJ2|DPM1|ETNK2|PIK3C3|CHPT1|MPPE1|PIGL|PIGG
70727	2.1953e-08	9.0176e-07	61	437	cellular macromolecule localization	KDELR1|GPAA1|SRPR|AP2A1|DBI|PPP3CA|SEC61G|AKT1|BCAP29|SEC61B|SEC63|PDIA3|PRKCI|SSR4|USP4|SSR2|SSR3|TAP2|TOMM34|TAP1|TSC2|ARFGAP3|ARFGAP1|TOM1L2|IFNG|ERP29|SCG5|KDELR2|KDELR3|TP53|BLZF1|RBM22|COPB2|STX16|COPB1|DERL1|DERL2|CENPA|NCKIPSD|GGA1|SNX1|SNX2|LMNA|SSR1|MAPK1|SNX9|BID|BCAP31|RANBP2|SEC24B|SEC24A|ZBTB16|ARCN1|TOMM70A|VPS41|MDM2|CTNNB1|TPP1|CALR|SEC24D|SEC24C
9607	2.3264e-08	9.4523e-07	62	448	response to biotic stimulus	HERPUD2|PCSK1|GSK3B|HSP90AB1|HSPB1|ERO1L|HERPUD1|CASP8|CCND1|CREB3L3|ALDH2|CREB3L2|PIM2|CHAC1|HSP90AA1|HIST2H2BE|TNFRSF1A|CREB3|IFNG|DDIT3|DNAJC4|ATF6|TP53|TLR4|IFNAR1|HIST1H2BC|PPP1R15B|DERL3|HSPA4L|DERL1|DERL2|UBE2J2|RNF5|RELA|PRDX3|PRDX2|DNAJB1|PCBP2|MAPK1|MAPK3|EDEM3|TOR1A|HSPA1L|HSPA5|WFS1|EIF2AK1|EDEM1|AMFR|EDEM2|EIF2AK3|EIF2AK2|EIF2AK4|HSPA2|DNAJA1|IL6|CDK6|POLR3B|VAPB|BCL2|STUB1|HSPA1B|NF…
43065	3.0864e-08	1.2285e-06	61	441	positive regulation of apoptosis	FOXA1|APP|RYR2|PDCD6|FAF1|ITSN1|HMGB1|ETS1|ARHGAP4|SMPD2|CASP8|CASP4|AKT1|CASP2|PDIA3|ENDOG|TUBB|DAPK3|RPS6|TRAF2|RPS3A|DUSP6|SENP1|IFNG|TRAF3|DDIT3|TRAF6|SQSTM1|TP53|TLR4|CEBPB|CUL3|CEBPG|CUL1|HTRA2|PSEN1|STK4|FGD1|STK3|FGD3|MAPK9|MAPK8|BCL2L11|PRDX1|BNIP1|RPS3|HMOX1|MAPK1|BAK1|BID|PAK3|ZBTB16|CFLAR|SOD1|DNAJA3|DLC1|BCL2|CTNNB1|BAX|ATM|SERINC3
48193	3.0893e-08	1.2285e-06	28	132	Golgi vesicle transport	COPB2|ARF1|TMED10|STX16|GOSR2|COPB1|ARL1|AP2A1|LMAN1|KIF1C|TXNDC5|SEC24B|MON2|PRKCI|SEC24A|COG5|GBF1|WIPI1|ARFGAP1|ARCN1|RER1|RAB14|DNAJC6|VPS41|MPPE1|SEC24D|SEC24C|BLZF1
10604	3.3745e-08	1.3278e-06	106	942	positive regulation of macromolecule metabolic process	FOXA1|ATF2|APP|IRS1|ETS1|CCND1|PSMD2|MYC|CREB3L2|AKT1|SMARCAD1|EPM2A|PUS1|TAP1|FOXP3|ILF2|AR|ILF3|CCNE1|TBL1XR1|DDIT3|GAPDHS|PSME2|PRKCQ|ATF6|SQSTM1|TP53|ATF4|RPN2|SHC1|RPN1|CUL1|PSEN1|CCNB1|HMOX1|SCAP|ZNF148|ATG7|EIF2B5|CREBBP|HSPA5|WFS1|ESR1|NFKB1|IL6|CDK7|SP1|MDM2|REL|BCL2|PIN1|CALR|NFE2L2|HMGB1|TAZ|RPS4X|UBL5|SUMO2|UBTF|TBP|SPHK1|H2AFX|TNFRSF1A|PSMA5|PSMA6|PPM1A|CREB3|PAX8|IFNG|TRAF6|HCLS1|TL…
31325	3.6762e-08	1.4167e-06	108	967	positive regulation of cellular metabolic process	FOXA1|ATF2|APP|IRS1|ETS1|CCND1|PSMD2|MYC|CREB3L2|AKT1|SMARCAD1|PIM2|EPM2A|PUS1|TAP1|FOXP3|ILF2|AR|ILF3|CCNE1|TBL1XR1|DDIT3|GAPDHS|PSME2|PRKCQ|HPRT1|ATF6|SQSTM1|TP53|ATF4|RPN2|SHC1|RPN1|CUL1|ADRB1|PSEN1|CCNB1|HMOX1|SCAP|ZNF148|ATG7|EIF2B5|CREBBP|HSPA5|NFKB1|IL6|CDK7|SP1|MDM2|REL|BCL2|PIN1|CALR|NFE2L2|HSP90AB1|HMGB1|TAZ|RPS4X|UBL5|SUMO2|UBTF|HSP90AA1|TBP|SPHK1|H2AFX|TNFRSF1A|PSMA5|PSMA6|PPM1A|CREB3…
6903	3.673e-08	1.4167e-06	11	22	vesicle targeting	COPB2|ARF1|TMED10|COPB1|GBF1|WIPI1|PSEN1|SNAP29|ARFGAP1|GCK|ARCN1
30433	4.6089e-08	1.758e-06	12	27	ER-associated protein catabolic process	NPLOC4|HSPA5|EDEM1|DERL3|AMFR|DERL1|SYVN1|DERL2|UBE2G2|SEC61B|RNF5|HSP90B1
9893	4.7526e-08	1.7945e-06	112	1019	positive regulation of metabolic process	FOXA1|ATF2|APP|IRS1|ETS1|CCND1|PSMD2|MYC|CREB3L2|AKT1|SMARCAD1|PIM2|EPM2A|PUS1|TAP1|FOXP3|ILF2|AR|ILF3|CCNE1|TBL1XR1|DDIT3|GAPDHS|PSME2|PRKCQ|HPRT1|ATF6|SQSTM1|TP53|ATF4|RPN2|SHC1|RPN1|CUL1|ADRB1|PSEN1|CCNB1|HMOX1|SCAP|ZNF148|ATG7|EIF2B5|CREBBP|HSPA5|WFS1|ESR1|NFKB1|IL6|CDK7|SP1|MDM2|REL|BCL2|PIN1|CALR|NFE2L2|HSP90AB1|HMGB1|TAZ|RPS4X|UBL5|SUMO2|UBTF|HSP90AA1|TBP|SPHK1|H2AFX|TNFRSF1A|PSMA5|PSMA6|P…
45017	6.7858e-08	2.5365e-06	21	83	glycerolipid biosynthetic process	PCYT1B|PIGT|ALG9|CHKB|DGAT1|CHKA|PIGN|GPAA1|PIGP|ALG12|PLA2G6|TAZ|AGPAT1|PIK3C2A|AGPAT2|DPM1|ETNK2|CHPT1|MPPE1|PIGL|PIGG
48523	1.0328e-07	3.8223e-06	177	1843	negative regulation of cellular process	FOXA1|ATF2|ATP8A2|IRS1|ITSN1|FAIM2|ETS1|PARK2|SCAMP5|YY1|CCND1|PSMD2|MYC|PIM1|AKT1|PIM3|PIM2|TSPYL2|PRKCI|USP4|PRKCD|RPS6|USP2|TSC2|LDOC1|FOXP3|AR|ILF3|CFDP1|TBL1XR1|DDIT3|CSNK2B|PSME2|SQSTM1|TP53|VPS28|CERKL|TSG101|RPN2|CUL3|RPN1|CUL1|PSEN1|STK4|CORO1A|ADIPOR2|RTN4|PHF21A|HSP90B1|STK3|PRDX3|PRDX2|CCNB1|PRDX5|BAG5|NUAK2|BAG1|HMOX1|ZNF148|ATG5|TXNDC5|MCL1|EIF2B5|PRNP|EIF2B4|CREBBP|UBE2I|HSPA5|ATP8…
7165	1.4091e-07	5.1205e-06	179	1877	signal transduction	ATF2|TRRAP|IRS1|ITSN1|ARAF|COL4A3BP|SLK|CCND1|AKT1|TRIM23|CDKL2|PDGFRB|IGFBP1|PDIA3|RAB2B|MAP2K4|CSNK1G3|PRKCH|CSNK2A1|STARD8|DAPK3|PRKCD|RPS6|TSC2|OCRL|GAPVD1|AR|RAB30|RAB36|RRAGC|CSNK2B|PLAA|ATF6|TP53|RIN2|CSNK1G2|ARL8B|IFNAR1|GRIA1|RTN2|RAB5B|RTN1|SHC1|ARL1|ITPR1|ARHGAP19|ARL2|ARHGAP18|ARHGAP17|ADRB1|PSEN1|STK4|CORO1C|SLC9A1|STK3|NCKIPSD|INPP5B|ARHGAP22|PRDX2|CCNB1|PRDX4|INPP5F|HMOX1|SCAP|SRGA…
48199	1.4109e-07	5.1205e-06	8	12	vesicle targeting, to, from or within Golgi	COPB2|ARF1|TMED10|COPB1|GBF1|WIPI1|ARFGAP1|ARCN1
46486	1.4739e-07	5.2976e-06	31	167	glycerolipid metabolic process	PIGT|PIGN|GPAA1|PIGP|PIK3CB|PLA2G6|TAZ|AGPAT1|PIK3C2A|AGPAT2|PIK3CG|INPP5F|PCYT1B|ALG9|CHKB|DGAT1|CHKA|PLA2G4B|OCRL|ALG12|SYNJ2|SIRT1|DPM1|ETNK2|CAT|PIK3C3|CHPT1|MPPE1|PIGL|PIGG|SLC27A5
48519	2.1985e-07	7.8266e-06	189	2019	negative regulation of biological process	FOXA1|ATF2|ATP8A2|IRS1|ITSN1|FAIM2|ETS1|PARK2|SCAMP5|YY1|CCND1|PSMD2|MYC|PIM1|AKT1|PIM3|PIM2|TSPYL2|PRKCI|USP4|PRKCD|RPS6|USP2|TAP1|TSC2|LDOC1|FOXP3|AR|ILF3|CFDP1|TBL1XR1|DDIT3|CSNK2B|PSME2|SQSTM1|TP53|VPS28|CERKL|PXK|TSG101|RPN2|CUL3|RPN1|CUL1|ADRB1|PSEN1|STK4|CORO1A|ADIPOR2|RTN4|PHF21A|HSP90B1|STK3|PRDX3|PRDX2|CCNB1|PRDX5|BAG5|NUAK2|PCBP2|BAG1|HMOX1|SCAP|ZNF148|ATG5|TXNDC5|MCL1|EIF2B5|PRNP|EIF2…
51098	3.3543e-07	1.1829e-05	34	200	regulation of binding	FOXA1|GSK3B|HDAC2|CEBPG|PSEN1|HMGB1|PARK7|RELA|ADD1|IKBKB|PRDX3|PRDX2|PIM1|RPS3|HMOX1|BAK1|MAPK3|SPHK1|PRKCD|EIF2AK3|TRAF2|SIRT1|FOXP3|IL6|DDIT3|TRAF6|DNAJA3|CSNK2B|CAT|BCL2|BAX|TPP1|TLR4|ATR
31396	3.9864e-07	1.3926e-05	25	123	regulation of protein ubiquitination	RPN2|RPN1|CUL1|PSMA7|UBL5|CCNB1|PSMB5|BAG5|RNF139|PSMD2|UBQLN1|BUB3|ATG5|EPM2A|HSPA5|USP4|SPHK1|PSMA5|PSMA6|PSMC6|DNAJA3|PSME2|PIN1|STUB1|VPS28
70887	4.2767e-07	1.4791e-05	54	400	cellular response to chemical stimulus	CLIC4|IRS1|HMGB1|ERO1L|HERPUD1|CCND1|ALDH2|PIM1|AKT1|PDGFRB|IGFBP1|PRKCI|SPHK1|CCNA1|IFNG|CCNE1|DDIT3|CAT|ATF6|CFTR|PRKAA2|SHC1|DERL3|DERL1|DERL2|PDXP|CORO1A|RNF5|ADIPOR2|HSP90B1|PRDX3|PRDX2|CCNB1|PRDX5|PRDX1|HMOX1|TRAP1|GOT1|HSPA5|EIF2AK1|AMFR|EIF2AK3|EIF2AK2|ASNS|EIF2AK4|USF1|KLF2|SOD1|IL6|VAPB|DLC1|CTNNB1|STUB1|NFE2L2
44419	4.313e-07	1.4791e-05	47	328	interspecies interaction between organisms	RTN3|CEBPA|TSG101|SRC|HDAC1|SUV39H1|GTF2B|COPB1|DERL1|CUL1|CENPA|PSMA7|RELA|SYNCRIP|PSMB5|SLK|MAPK1|PAK2|TRIM23|MAPK3|CREBBP|VCAM1|UBE2I|TBP|PDCD6IP|EIF2AK1|TAP2|EIF2AK2|TAP1|CFLAR|SIRT1|TNFRSF1A|HCFC1|CREB3|RRAGA|NACA|SP1|VAPB|MDM2|ATF7|FBXL2|VIM|TP53|PPIA|TLR4|RCOR1|TAF1
71310	4.5418e-07	1.5434e-05	38	240	cellular response to organic substance	PRKAA2|SHC1|IRS1|DERL3|DERL1|DERL2|PDXP|RNF5|ADIPOR2|ERO1L|HSP90B1|HERPUD1|CCNB1|CCND1|ALDH2|AKT1|IGFBP1|PRKCI|GOT1|HSPA5|EIF2AK1|AMFR|EIF2AK3|EIF2AK2|ASNS|EIF2AK4|USF1|KLF2|CCNA1|IFNG|VAPB|DDIT3|DLC1|CTNNB1|STUB1|ATF6|CFTR|NFE2L2
18196	5.533e-07	1.8303e-05	7	10	peptidyl-asparagine modification	RPN2|TUSC3|DAD1|RPN1|STT3A|STT3B|DDOST
18279	5.533e-07	1.8303e-05	7	10	protein amino acid N-linked glycosylation via asparagine	RPN2|TUSC3|DAD1|RPN1|STT3A|STT3B|DDOST
6983	5.533e-07	1.8303e-05	7	10	ER overload response	PPP1R15B|GSK3B|HSPA5|WFS1|DDIT3|EIF2AK3|TP53
70647	7.1912e-07	2.358e-05	39	254	protein modification by small protein conjugation or removal	USP15|TSG101|TRRAP|USP10|CUL3|USP33|USP11|CUL1|RNF5|PARK2|VCPIP1|SUMO2|AKT1|TRIM23|EPM2A|UBE2F|SUZ12|USP8|USP20|USP4|USP21|FBXO2|AMFR|USP22|USP2|UBE2G1|UBE4B|TRAF2|UBE2G2|RBX1|SENP1|UFM1|COPS5|TRAF6|MDM2|UFC1|BCL2|STUB1|OTUB1
22402	8.7308e-07	2.8134e-05	70	584	cell cycle process	SUV39H2|APP|HK2|PPP3CA|PPP6C|CCND1|PSMD2|MYC|PIM1|AKT1|NEK1|NEK2|HORMAD2|PIM2|SKP2|TUBB|RPS6|H2AFX|CDC25A|CDC25B|PSMA5|PSMA6|CCNA1|ILF3|KIF2A|IFNG|CCNE1|DDIT3|CKS2|PSME2|KIF2C|TP53|TSG101|SEH1L|HDAC3|RPN2|DCTN1|CUL3|RPN1|CUL1|CENPA|PSMA7|PPM1G|PSMC3IP|VCPIP1|CCNB1|PSMB5|KATNA1|BUB3|BUB1|NEK8|NEK9|DYNC1H1|PRNP|KLHDC3|UBE2I|NEK4|MRE11A|PA2G4|HSPA2|PSMC6|CDK6|CDK4|MDM2|BCL2|CDK10|CTNNB1|ATM|CALR|TAF1
31399	8.7244e-07	2.8134e-05	50	367	regulation of protein modification process	TAZ|PARK2|UBL5|CCND1|PSMD2|EPM2A|PDGFRB|DBNL|USP4|SPHK1|PRKCD|TRAF2|PAX5|FOXP3|PSMA5|PSMA6|IFNG|TRAF6|NDUFS4|PSME2|HCLS1|TP53|TLR4|VPS28|RPN2|RPN1|CUL1|PSEN1|PSMA7|PAK1|CCNB1|PSMB5|BAG5|RNF139|UBQLN1|BUB3|MAP4K5|ATG7|ATG5|HSPA5|EIF2AK1|MRE11A|IL6|PSMC6|DNAJA3|DLC1|BCL2|PIN1|STUB1|BCOR
19637	9.6356e-07	3.0784e-05	34	209	organophosphate metabolic process	PIGT|PIGN|GPAA1|PIGP|PIK3CB|PLA2G6|TAZ|AGPAT1|PIK3C2A|AGPAT2|PIK3CG|SMPD2|INPP5F|CEPT1|PCYT1B|ALG9|PCYT1A|CHKB|CHKA|PLA2G4B|TALDO1|OCRL|ALG12|SYNJ2|SGPP1|DPM1|ETNK2|PLAA|PIK3C3|CHPT1|MPPE1|PIGL|GPD1L|PIGG
23046	1.0128e-06	3.155e-05	196	2156	signaling process	ATF2|APP|TRRAP|ITSN1|ARAF|AKT1|TRIM23|PRKCH|CSNK2A1|STARD8|DAPK3|PRKCD|GAPVD1|AR|AFG3L2|RRAGC|CSNK2B|ATF6|TP53|RIN2|INPP5B|PRDX2|PRDX4|INPP5F|HMOX1|SCAP|SRPK2|TRAP1|CREBBP|STARD13|EIF2AK3|RAB39B|PPT1|HIST1H4H|ATM|ATR|ARF3|ARF4|ARF1|FAF1|PRKAG1|RAB22A|ARHGAP4|IKBKB|SMPD2|PPP3CA|HINT1|KIF1B|TMED1|DBNL|SPHK1|GMIP|DUSP6|CKS2|TLR4|ARF5|ARF6|PKN3|RELA|FGD1|ARFRP1|PAK1|CHN2|CHN1|PAK3|MAP4K5|PAK2|MAP4K3|…
23060	1.0128e-06	3.155e-05	196	2156	signal transmission	ATF2|APP|TRRAP|ITSN1|ARAF|AKT1|TRIM23|PRKCH|CSNK2A1|STARD8|DAPK3|PRKCD|GAPVD1|AR|AFG3L2|RRAGC|CSNK2B|ATF6|TP53|RIN2|INPP5B|PRDX2|PRDX4|INPP5F|HMOX1|SCAP|SRPK2|TRAP1|CREBBP|STARD13|EIF2AK3|RAB39B|PPT1|HIST1H4H|ATM|ATR|ARF3|ARF4|ARF1|FAF1|PRKAG1|RAB22A|ARHGAP4|IKBKB|SMPD2|PPP3CA|HINT1|KIF1B|TMED1|DBNL|SPHK1|GMIP|DUSP6|CKS2|TLR4|ARF5|ARF6|PKN3|RELA|FGD1|ARFRP1|PAK1|CHN2|CHN1|PAK3|MAP4K5|PAK2|MAP4K3|…
32269	1.0013e-06	3.155e-05	33	200	negative regulation of cellular protein metabolic process	HSP90AB1|RPN2|RPN1|FURIN|PSEN1|TAZ|PSMA7|PARK2|CCNB1|PSMB5|BAG5|PSMD2|RAB23|IGF2BP1|BUB3|ATG5|EIF2B5|EIF2B4|USP4|EIF2AK1|PRKCD|EIF2AK3|EIF2AK4|PAX5|FOXP3|NFKB1|PSMA5|PSMA6|PSMC6|PSME2|CALR|BCOR|VPS28
51726	1.3438e-06	4.1514e-05	57	447	regulation of cell cycle	FOXA1|APP|TRRAP|FOXM1|ETS1|CKS1B|UBL5|CCND1|MYC|PIM1|AKT1|PIM3|NEK2|ILKAP|TSPYL2|CSNK2A1|SPHK1|RPS6|USP2|H2AFX|TSC2|CDC25A|HCFC1|CREB3|IFNG|DDIT3|CKS2|PRKCQ|TP53|CUL7|HDAC2|TSG101|HDAC3|HDAC1|CUL3|CUL1|PPM1G|CCNB1|BUB3|BUB1|PRNP|CREBBP|USP22|MRE11A|ASNS|PA2G4|CDK7|CDK6|COPS5|CDK4|MDM2|BCL2|PIN1|CDK10|ATM|CALR|ATR
10324	1.4213e-06	4.3194e-05	35	222	membrane invagination	ITSN2|GRIA1|APP|USP33|ITSN1|AP2A1|FNBP1L|CORO1A|RABEPK|RAB22A|HK2|CORO1C|SNX3|RABGEF1|SNX4|SNX1|SNX2|DBNL|USP20|FNBP1|TSC2|EPS15L1|GTF2H2|GAPVD1|DNM1|EHD1|DNM3|EHD2|EHD4|SYNJ1|PPT1|TRIP10|AMPH|RIN2|RAB5A
6897	1.4213e-06	4.3194e-05	35	222	endocytosis	ITSN2|GRIA1|APP|USP33|ITSN1|AP2A1|FNBP1L|CORO1A|RABEPK|RAB22A|HK2|CORO1C|SNX3|RABGEF1|SNX4|SNX1|SNX2|DBNL|USP20|FNBP1|TSC2|EPS15L1|GTF2H2|GAPVD1|DNM1|EHD1|DNM3|EHD2|EHD4|SYNJ1|PPT1|TRIP10|AMPH|RIN2|RAB5A
48194	1.4342e-06	4.3234e-05	7	11	Golgi vesicle budding	COPB2|ARF1|PRKCI|COPB1|GBF1|ARFGAP1|ARCN1
51248	1.503e-06	4.4946e-05	34	213	negative regulation of protein metabolic process	HSP90AB1|RPN2|RPN1|FURIN|PSEN1|TAZ|PSMA7|RELA|PARK2|CCNB1|PSMB5|BAG5|PSMD2|RAB23|IGF2BP1|BUB3|ATG5|EIF2B5|EIF2B4|USP4|EIF2AK1|PRKCD|EIF2AK3|EIF2AK4|PAX5|FOXP3|NFKB1|PSMA5|PSMA6|PSMC6|PSME2|CALR|BCOR|VPS28
43558	2.0837e-06	6.1818e-05	6	8	regulation of translational initiation in response to stress	EIF2B5|EIF2B4|EIF2AK3|EIF2AK4|EIF2S1|EIF2A
8654	2.2173e-06	6.5262e-05	22	109	phospholipid biosynthetic process	PCYT1B|PIGT|ALG9|PCYT1A|CHKB|CHKA|PIGN|GPAA1|PIGP|ALG12|PLA2G6|TAZ|AGPAT1|PIK3C2A|AGPAT2|DPM1|ETNK2|CHPT1|MPPE1|PIGL|CEPT1|PIGG
6644	2.3112e-06	6.7493e-05	32	198	phospholipid metabolic process	PIGT|PIGN|GPAA1|PIGP|PIK3CB|PLA2G6|TAZ|AGPAT1|PIK3C2A|AGPAT2|PIK3CG|SMPD2|INPP5F|CEPT1|PCYT1B|ALG9|PCYT1A|CHKB|CHKA|PLA2G4B|OCRL|ALG12|SYNJ2|SGPP1|DPM1|ETNK2|PLAA|PIK3C3|CHPT1|MPPE1|PIGL|PIGG
16197	2.7396e-06	7.9386e-05	17	71	endosome transport	MON2|STX16|VPS4B|VPS4A|AP2A1|VPS26A|WIPI1|HK2|HK1|EHD1|SNX1|SNX16|RAB14|VPS35|SQSTM1|EPS15|CHMP7
70646	2.8391e-06	8.1635e-05	14	50	protein modification by small protein removal	USP8|USP15|USP20|TRRAP|USP4|USP10|USP21|USP33|USP11|USP22|USP2|SENP1|COPS5|OTUB1
48872	3.2193e-06	9.186e-05	20	95	homeostasis of number of cells	RPS6|CEBPG|BPGM|FOXP3|CORO1A|SOD1|IKBKB|PRDX2|IL6|BCL2L11|IFNG|SP1|PRDX1|DNAJA3|SP3|BCL2|AKT1|TCEA1|HMOX1|HCLS1
1776	3.6293e-06	0.00010277	11	32	leukocyte homeostasis	IKBKB|IL6|BCL2L11|IFNG|DNAJA3|RPS6|BCL2|AKT1|FOXP3|CORO1A|SOD1
46777	3.6611e-06	0.0001029	18	80	protein amino acid autophosphorylation	PDGFRB|EIF2AK1|EIF2AK3|EIF2AK2|STK4|EIF2S1|PAK1|SLK|MAPK7|TAOK3|PIM1|AKT1|NEK2|ATM|PAK2|CSNK1G2|EIF2A|TAF1
44255	3.7269e-06	0.00010396	65	551	cellular lipid metabolic process	DPAGT1|ACADVL|PIGT|CERK|PIGN|GPAA1|PIGP|PRKAG1|PIK3CB|TAZ|PIK3C2A|PIK3CG|SMPD2|ARV1|COL4A3BP|SPTLC1|PCYT1B|ALG9|PCYT1A|ELOVL4|DGAT1|GGPS1|SPHK1|PLA2G4B|ELOVL6|OCRL|ALG12|SIRT1|TNFRSF1A|DPM1|SOAT2|CAT|PPAP2A|PLAA|PIK3C3|CYP2E1|MPPE1|PIGL|PIGG|SLC27A3|SLC27A5|PRKAA1|PRKAA2|HMGCR|PLA2G6|AGPAT1|AGPAT2|ADIPOR2|RDH12|INPP5F|RDH11|ORMDL2|ORMDL3|CEPT1|CHKB|CHKA|GBF1|ORMDL1|SYNJ2|SGPP1|ETNK2|FASN|PPT1|CHP…
51650	5.1196e-06	0.00014176	11	33	establishment of vesicle localization	COPB2|ARF1|TMED10|COPB1|GBF1|WIPI1|PSEN1|SNAP29|ARFGAP1|GCK|ARCN1
6325	5.2837e-06	0.00014522	52	412	chromatin organization	FOXA1|SUV39H2|SETD2|TRRAP|EHMT2|SUV39H1|HDAC11|VPS72|H2AFJ|SMARCAD1|HMG20A|WHSC1L1|TSPYL2|H2AFY|H2AFZ|DAPK3|H2AFX|H2AFV|SIRT1|FOXP3|HIST2H2BE|TBL1XR1|HIST1H2BC|SMARCD1|HDAC2|HDAC3|HDAC1|CXXC1|CENPA|PHF21A|PAK1|RBBP4|RBBP5|NSD1|EP400|RBBP7|SMARCE1|SUZ12|CREBBP|USP21|USP22|H3F3A|SMARCA5|NAP1L3|NAP1L1|NAP1L4|H1F0|HIST3H2A|HIST1H4H|BCOR|EZH1|RCOR1
43555	5.899e-06	0.00016095	6	9	regulation of translation in response to stress	EIF2B5|EIF2B4|EIF2AK3|EIF2AK4|EIF2S1|EIF2A
278	6.3046e-06	0.00017077	49	382	mitotic cell cycle	APP|HK2|PPP3CA|PPP6C|CCND1|PSMD2|PIM1|AKT1|NEK1|NEK2|HORMAD2|SKP2|TUBB|RPS6|CDC25A|CDC25B|PSMA5|PSMA6|CCNA1|KIF2A|CCNE1|PSME2|KIF2C|SEH1L|RPN2|DCTN1|CUL3|RPN1|CUL1|CENPA|PSMA7|VCPIP1|CCNB1|PSMB5|KATNA1|BUB3|BUB1|NEK8|NEK9|DYNC1H1|UBE2I|NEK4|PSMC6|CDK6|CDK4|MDM2|BCL2|CDK10|TAF1
32469	7.1857e-06	0.00019324	5	6	endoplasmic reticulum calcium ion homeostasis	APP|WFS1|ITPR1|BCL2|PSEN1
32270	9.429e-06	0.00025176	40	292	positive regulation of cellular protein metabolic process	HDAC2|RPN2|RPN1|CUL1|FURIN|PSEN1|PSMA7|RPS4X|UBL5|CCNB1|PSMB5|CCND1|PSMD2|SUMO2|AKT1|MAPK1|ATG7|EPM2A|EIF2B5|HSPA5|SPHK1|SAMD4A|MRE11A|FOXP3|PSMA5|PSMA6|IL6|PSMC6|IFNG|DNAJA3|DLC1|MDM2|BCL2|PSME2|PIN1|HCLS1|STUB1|TP53|TLR4|TAF1
43413	9.9457e-06	0.00025998	22	119	macromolecule glycosylation	POMT2|DPAGT1|ALG8|ALG6|RPN2|TUSC3|POMT1|ALG5|RPN1|ALG3|ALG12|PSEN1|DDOST|DPM1|MAN1A2|DAD1|STT3A|MAN1C1|STT3B|MAN1B1|GCS1|IL17A
70085	9.9457e-06	0.00025998	22	119	glycosylation	POMT2|DPAGT1|ALG8|ALG6|RPN2|TUSC3|POMT1|ALG5|RPN1|ALG3|ALG12|PSEN1|DDOST|DPM1|MAN1A2|DAD1|STT3A|MAN1C1|STT3B|MAN1B1|GCS1|IL17A
6486	9.9457e-06	0.00025998	22	119	protein amino acid glycosylation	POMT2|DPAGT1|ALG8|ALG6|RPN2|TUSC3|POMT1|ALG5|RPN1|ALG3|ALG12|PSEN1|DDOST|DPM1|MAN1A2|DAD1|STT3A|MAN1C1|STT3B|MAN1B1|GCS1|IL17A
51329	1.0044e-05	0.00026073	20	102	interphase of mitotic cell cycle	APP|CUL3|RPS6|CUL1|CDC25A|PPP3CA|PPP6C|CCNB1|CDK6|CCND1|CCNE1|CDK4|KATNA1|PIM1|MDM2|BCL2|AKT1|CDK10|SKP2|TAF1
6917	1.1175e-05	0.00028807	42	315	induction of apoptosis	APP|RYR2|CEBPB|PDCD6|CUL3|ITSN1|CEBPG|CUL1|HTRA2|PSEN1|ETS1|FGD1|ARHGAP4|FGD3|SMPD2|MAPK9|MAPK8|BCL2L11|CASP8|PRDX1|CASP4|BNIP1|RPS3|HMOX1|CASP2|MAPK1|BAK1|BID|PAK3|TUBB|DAPK3|RPS3A|CFLAR|SENP1|TRAF3|TRAF6|DLC1|BAX|ATM|SERINC3|SQSTM1|TP53
12502	1.2086e-05	0.00030943	42	316	induction of programmed cell death	APP|RYR2|CEBPB|PDCD6|CUL3|ITSN1|CEBPG|CUL1|HTRA2|PSEN1|ETS1|FGD1|ARHGAP4|FGD3|SMPD2|MAPK9|MAPK8|BCL2L11|CASP8|PRDX1|CASP4|BNIP1|RPS3|HMOX1|CASP2|MAPK1|BAK1|BID|PAK3|TUBB|DAPK3|RPS3A|CFLAR|SENP1|TRAF3|TRAF6|DLC1|BAX|ATM|SERINC3|SQSTM1|TP53
30384	1.2786e-05	0.00032513	17	79	phosphoinositide metabolic process	PIGT|ALG9|PIGN|GPAA1|PIGP|OCRL|ALG12|PIK3CB|SYNJ2|PIK3C2A|PIK3CG|DPM1|INPP5F|PIK3C3|MPPE1|PIGL|PIGG
9408	1.3866e-05	0.00034683	15	64	response to heat	EIF2B5|EIF2B4|HDAC2|CLPB|HSPA1L|DHX9|HSPB1|SOD1|DNAJA1|DNAJA3|DNAJA2|BCL2|AKT1|PRKCQ|RBBP7
48200	1.3918e-05	0.00034683	6	10	Golgi transport vesicle coating	COPB2|ARF1|COPB1|GBF1|ARFGAP1|ARCN1
48205	1.3918e-05	0.00034683	6	10	COPI coating of Golgi vesicle	COPB2|ARF1|COPB1|GBF1|ARFGAP1|ARCN1
6900	1.4164e-05	0.00035062	8	19	membrane budding	COPB2|ARF1|PRKCI|COPB1|GBF1|EPS15|ARFGAP1|ARCN1
34645	1.5034e-05	0.00036931	103	1033	cellular macromolecule biosynthetic process	DPAGT1|TUSC3|GTF2B|ZDHHC1|ETS1|RPL36AL|RPS18|NARS2|CCRN4L|ALG8|ALG9|ALG6|ALG5|RPS6|GTF3A|SARS|ALG3|ALG12|CDC25A|HCFC1|DPM1|AR|RRAGC|DDIT3|XRN2|TFAM|MPPE1|GCS1|TP53|RPN2|RPN1|NRF1|PSEN1|ATG7|EIF2B5|EIF2B4|EIF2AK1|SMARCA5|EIF2AK2|TRIP4|MRPL23|EEF2|ESR1|NFKB1|RPS26|CDK7|COPS5|FUBP3|NACA|STT3A|STT3B|NFE2L1|NFE2L2|AARS|ATR|POMT2|PIGT|PIGN|GPAA1|PIGP|POMT1|YBX1|FOXM1|RPS4X|EEF2K|MAN1A2|EIF5B|TBP|NCOA5|…
9267	1.5116e-05	0.00036931	12	43	cellular response to starvation	MAP1LC3A|NUAK2|HSPA5|SPHK1|ASNS|EIF2AK4|PSEN1|SIRT1|SQSTM1|TP53|CTSD|ATG5
7005	1.524e-05	0.00036992	23	131	mitochondrion organization	CEBPA|HSP90AA1|TOMM34|HTRA2|DBI|SYNJ2|TAZ|PRDX3|COL4A3BP|CASP7|DNAJA3|TOMM70A|NDUFS4|PIM1|BCL2|AKT1|TFAM|BAX|PIM2|BAK1|BID|DNM1L|TP53
51247	1.5946e-05	0.00038455	41	309	positive regulation of protein metabolic process	HDAC2|RPN2|RPN1|CUL1|FURIN|PSEN1|PSMA7|RPS4X|UBL5|CCNB1|PSMB5|CCND1|PSMD2|SUMO2|AKT1|MAPK1|ATG7|EPM2A|EIF2B5|HSPA5|WFS1|SPHK1|SAMD4A|MRE11A|FOXP3|PSMA5|PSMA6|IL6|PSMC6|IFNG|DNAJA3|DLC1|MDM2|BCL2|PSME2|PIN1|HCLS1|STUB1|TP53|TLR4|TAF1
23014	1.6543e-05	0.00039387	46	363	signal transmission via phosphorylation event	PRKAA1|SHC1|SRC|PRKCSH|IRS1|FAF1|PIK3CB|PSEN1|STK4|SLC9A1|STK3|IKBKB|SMPD2|PRDX2|MAPK9|PAK1|MAPK8|SLK|PRDX4|MAPK7|AKT1|HMOX1|MAPK1|MAP2K7|MAP4K5|MAP4K3|MARK2|SRPK2|MAP2K4|DBNL|DAPK3|TSC2|TRAF2|OXSR1|MAPK14|DUSP6|GCK|SOD1|MAPK13|MAPK11|TAOK3|IFNG|TNIP2|TRAF6|TLR4|IFNAR1
7243	1.6543e-05	0.00039387	46	363	intracellular protein kinase cascade	PRKAA1|SHC1|SRC|PRKCSH|IRS1|FAF1|PIK3CB|PSEN1|STK4|SLC9A1|STK3|IKBKB|SMPD2|PRDX2|MAPK9|PAK1|MAPK8|SLK|PRDX4|MAPK7|AKT1|HMOX1|MAPK1|MAP2K7|MAP4K5|MAP4K3|MARK2|SRPK2|MAP2K4|DBNL|DAPK3|TSC2|TRAF2|OXSR1|MAPK14|DUSP6|GCK|SOD1|MAPK13|MAPK11|TAOK3|IFNG|TNIP2|TRAF6|TLR4|IFNAR1
10035	1.7935e-05	0.00042432	34	238	response to inorganic substance	PPP1R15B|PCSK1|RYR2|CLIC4|PEF1|PDCD6|CPOX|PARK7|NDRG1|ACTB|RELA|PRDX3|PRDX2|PPP2CB|MAPK9|CCNB1|PRDX5|MAPK8|CASP8|CCND1|PRDX1|HMOX1|PRNP|SPHK1|TRPC1|ENTPD6|KLF2|SOD1|DDIT3|CAT|BCL2|CTNNB1|TFF1|GART
51325	1.825e-05	0.00042904	20	106	interphase	APP|CUL3|RPS6|CUL1|CDC25A|PPP3CA|PPP6C|CCNB1|CDK6|CCND1|CCNE1|CDK4|KATNA1|PIM1|MDM2|BCL2|AKT1|CDK10|SKP2|TAF1
42149	1.9194e-05	0.00044841	4	4	cellular response to glucose starvation	NUAK2|HSPA5|ASNS|TP53
10557	1.9887e-05	0.00046173	73	674	positive regulation of macromolecule biosynthetic process	FOXA1|ATF2|APP|IRS1|HMGB1|TAZ|ETS1|RPS4X|MYC|CREB3L2|UBTF|AKT1|SMARCAD1|TBP|PUS1|TAP1|FOXP3|ILF2|TNFRSF1A|AR|PPM1A|CREB3|ILF3|PAX8|IFNG|CCNE1|TBL1XR1|DDIT3|TRAF6|PRKCQ|ATF6|SQSTM1|TP53|TLR4|ATF4|CEBPA|SMARCD1|HDAC2|CEBPB|SHC1|HDAC1|CEBPG|RELA|PSMC3IP|NSD1|HMOX1|SCAP|MAPK1|PCBD2|TBL1X|ZNF148|EIF2B5|CREBBP|USP21|NFYC|USP22|SAMD4A|FOXJ2|NFKB1|GCK|USF1|KLF7|IL6|CDK7|SP1|REL|TCEA1|CTNNB1|CALR|LPIN2|NF…
45454	2.0591e-05	0.00047512	15	66	cell redox homeostasis	PDIA3|TUSC3|GBF1|PDIA6|DNAJC16|PDIA4|PRDX3|PRDX2|PRDX5|PRDX4|DDIT3|PRDX1|DNAJC10|P4HB|TXNDC5
51276	2.1941e-05	0.00050315	60	524	chromosome organization	FOXA1|SUV39H2|SETD2|TRRAP|EHMT2|SUV39H1|HDAC11|VPS72|H2AFJ|SMARCAD1|NEK2|HMG20A|WHSC1L1|TSPYL2|H2AFY|H2AFZ|DAPK3|H2AFX|H2AFV|SIRT1|FOXP3|HIST2H2BE|TBL1XR1|TP53|HIST1H2BC|SMARCD1|HDAC2|SEH1L|HDAC3|HDAC1|CXXC1|CENPA|PHF21A|PAK1|CCNB1|RBBP4|RBBP5|NSD1|EP400|RBBP7|BUB3|SMARCE1|SUZ12|CREBBP|HSPA1L|USP21|USP22|H3F3A|SMARCA5|NAP1L3|MRE11A|NAP1L1|NAP1L4|H1F0|HIST3H2A|HIST1H4H|TPP1|BCOR|EZH1|RCOR1
10608	2.3407e-05	0.00052575	34	241	posttranscriptional regulation of gene expression	ATF2|PPP1R15B|APP|DHX9|HSPB1|YBX1|RPS4X|SYNCRIP|IGF2BP1|AKT1|MAPK1|NCK1|EIF2A|EIF2B5|EIF5B|EIF2B4|USP4|EIF2AK1|PRKCD|USP2|EIF2AK3|SAMD4A|EIF2AK4|PA2G4|EIF2S1|IL6|DNAJA3|MDM2|BCL2|CALR|PABPC1|LSM14B|LSM14A|METAP1
51648	2.3426e-05	0.00052575	11	38	vesicle localization	COPB2|ARF1|TMED10|COPB1|GBF1|WIPI1|PSEN1|SNAP29|ARFGAP1|GCK|ARCN1
32933	2.377e-05	0.00052575	5	7	SREBP-mediated signaling pathway	INSIG2|LMNA|EIF2AK3|SCAP|EIF2A
35437	2.377e-05	0.00052575	5	7	maintenance of protein localization in endoplasmic reticulum	PDIA3|KDELR1|GPAA1|KDELR2|KDELR3
45084	2.377e-05	0.00052575	5	7	positive regulation of interleukin-12 biosynthetic process	IFNG|TRAF6|REL|TLR4|RELA
6621	2.377e-05	0.00052575	5	7	protein retention in ER lumen	PDIA3|KDELR1|GPAA1|KDELR2|KDELR3
8624	2.4278e-05	0.00053384	20	108	induction of apoptosis by extracellular signals	RYR2|PDCD6|ITSN1|PSEN1|CFLAR|FGD1|ARHGAP4|SENP1|FGD3|SMPD2|MAPK9|MAPK8|BCL2L11|CASP8|TRAF6|CASP2|BAX|BID|PAK3|SQSTM1
82	2.4679e-05	0.00053947	13	52	G1/S transition of mitotic cell cycle	CUL3|RPS6|CUL1|CDC25A|PPP3CA|PPP6C|CCND1|CCNE1|CDK4|PIM1|BCL2|AKT1|SKP2
6334	2.5364e-05	0.00055122	17	83	nucleosome assembly	TSPYL2|H2AFY|H2AFZ|H3F3A|H2AFX|SMARCA5|NAP1L3|H2AFV|NAP1L1|CENPA|HIST2H2BE|NAP1L4|H1F0|HIST3H2A|H2AFJ|HIST1H4H|HIST1H2BC
46034	2.6505e-05	0.00057269	19	100	ATP metabolic process	ATP8B4|ATP8A2|ATP8A1|ATP8B2|ATP8B1|ATP13A1|VPS4B|ATP10D|ATP2A3|ATP11C|ATP2A2|ATP1A3|ATP11B|ATP10A|ATP1A2|AK5|ATP2C1|ATP1B1|ATP6V0D1
22607	2.8417e-05	0.00060751	92	912	cellular component assembly	DPAGT1|APP|GPAA1|IRS1|GTF2B|PRKAG1|TAZ|PARK2|HK2|MAP1LC3A|CASP8|H2AFJ|PIM1|SMARCAD1|CTSD|NCK1|EIF2A|KCNH2|TSPYL2|HSP90AA1|TBP|DGAT1|H2AFY|H2AFZ|TUBB|RPS6|H2AFX|TSC2|H2AFV|TRAF2|HIST2H2BE|TNFRSF1A|DNM3|SOAT2|CSNK2B|CAT|NDUFS4|TCP1|TFAM|HPRT1|TLN1|TP53|BIRC3|HIST1H2BC|PRKAA2|HDAC3|ROCK1|SRC|CUL3|ARL2|PSEN1|CENPA|CORO1A|ADD1|FGD1|HSP90B1|FGD3|CCNB1|FGD6|REPS2|HMOX1|ASL|PCBD2|EPS15|ATG5|SRPK2|PRNP|CR…
65004	2.8441e-05	0.00060751	18	92	protein-DNA complex assembly	TSPYL2|H2AFY|H2AFZ|H3F3A|H2AFX|SMARCA5|NAP1L3|H2AFV|NAP1L1|CENPA|HIST2H2BE|NAP1L4|H1F0|HIST3H2A|H2AFJ|HIST1H4H|TAF1|HIST1H2BC
31328	3.1113e-05	0.00066081	76	719	positive regulation of cellular biosynthetic process	FOXA1|ATF2|APP|HSP90AB1|IRS1|HMGB1|TAZ|ETS1|RPS4X|MYC|CREB3L2|UBTF|AKT1|SMARCAD1|HSP90AA1|TBP|PUS1|TAP1|FOXP3|ILF2|TNFRSF1A|AR|PPM1A|CREB3|ILF3|PAX8|IFNG|CCNE1|TBL1XR1|DDIT3|TRAF6|PRKCQ|ATF6|SQSTM1|TP53|TLR4|ATF4|CEBPA|SMARCD1|HDAC2|CEBPB|SHC1|HDAC1|CEBPG|ADRB1|RELA|PSMC3IP|NSD1|HMOX1|SCAP|MAPK1|PCBD2|TBL1X|ZNF148|EIF2B5|CREBBP|USP21|NFYC|USP22|SAMD4A|FOXJ2|NFKB1|GCK|USF1|KLF7|IL6|CDK7|SP1|REL|TC…
34728	3.3119e-05	0.00069943	18	93	nucleosome organization	TSPYL2|SMARCE1|H2AFY|H2AFZ|H3F3A|H2AFX|SMARCA5|NAP1L3|H2AFV|NAP1L1|CENPA|HIST2H2BE|NAP1L4|H1F0|HIST3H2A|H2AFJ|HIST1H4H|HIST1H2BC
45931	3.3842e-05	0.00070671	8	21	positive regulation of mitotic cell cycle	FOXA1|APP|CCNB1|SPHK1|USP22|USP2|MDM2|ASNS
6890	3.3842e-05	0.00070671	8	21	retrograde vesicle-mediated transport, Golgi to ER	COPB2|ARF1|RER1|COPB1|GBF1|KIF1C|ARFGAP1|ARCN1
9059	3.4617e-05	0.00071889	103	1054	macromolecule biosynthetic process	DPAGT1|TUSC3|GTF2B|ZDHHC1|ETS1|RPL36AL|RPS18|NARS2|CCRN4L|ALG8|ALG9|ALG6|ALG5|RPS6|GTF3A|SARS|ALG3|ALG12|CDC25A|HCFC1|DPM1|AR|RRAGC|DDIT3|XRN2|TFAM|MPPE1|GCS1|TP53|RPN2|RPN1|NRF1|PSEN1|ATG7|EIF2B5|EIF2B4|EIF2AK1|SMARCA5|EIF2AK2|TRIP4|MRPL23|EEF2|ESR1|NFKB1|RPS26|CDK7|COPS5|FUBP3|NACA|STT3A|STT3B|NFE2L1|NFE2L2|AARS|ATR|POMT2|PIGT|PIGN|GPAA1|PIGP|POMT1|YBX1|FOXM1|RPS4X|EEF2K|MAN1A2|EIF5B|TBP|NCOA5|…
70972	3.702e-05	0.00076454	7	16	protein localization in endoplasmic reticulum	PDIA3|KDELR1|GPAA1|SEC61G|SRPR|KDELR2|KDELR3
43933	3.7546e-05	0.00076742	76	723	macromolecular complex subunit organization	DPAGT1|GPAA1|IRS1|GTF2B|PRKAG1|TAZ|HK2|CASP8|H2AFJ|PIM1|SMARCAD1|NCK1|EIF2A|KCNH2|TSPYL2|HSP90AA1|TBP|DGAT1|H2AFY|H2AFZ|TUBB|RPS6|H2AFX|TSC2|H2AFV|TRAF2|HIST2H2BE|TNFRSF1A|SOAT2|CSNK2B|CAT|NDUFS4|TCP1|XRN2|TFAM|KIF2C|HPRT1|TP53|BIRC3|HIST1H2BC|PRKAA2|SEH1L|SRC|ARL2|CENPA|CCNB1|REPS2|HMOX1|ASL|PCBD2|EPS15|SMARCE1|SRPK2|PRNP|CREBBP|AMFR|H3F3A|EIF2AK3|SMARCA5|NAP1L3|NAP1L1|GTF2H2|NAP1L4|H1F0|CDK7|HI…
65003	3.757e-05	0.00076742	72	675	macromolecular complex assembly	DPAGT1|GPAA1|IRS1|GTF2B|PRKAG1|TAZ|HK2|CASP8|H2AFJ|PIM1|SMARCAD1|NCK1|EIF2A|KCNH2|TSPYL2|HSP90AA1|TBP|DGAT1|H2AFY|H2AFZ|TUBB|RPS6|H2AFX|TSC2|H2AFV|TRAF2|HIST2H2BE|TNFRSF1A|SOAT2|CSNK2B|CAT|NDUFS4|TCP1|TFAM|HPRT1|TP53|BIRC3|HIST1H2BC|PRKAA2|SRC|ARL2|CENPA|CCNB1|REPS2|HMOX1|ASL|PCBD2|EPS15|SRPK2|PRNP|CREBBP|AMFR|H3F3A|EIF2AK3|SMARCA5|NAP1L3|NAP1L1|GTF2H2|NAP1L4|H1F0|CDK7|HIST3H2A|CAPZA1|CAPZA2|MDM2…
51173	3.9429e-05	0.000801	72	676	positive regulation of nitrogen compound metabolic process	FOXA1|ATF2|APP|HSP90AB1|HMGB1|TAZ|ETS1|MYC|CREB3L2|UBTF|AKT1|SMARCAD1|HSP90AA1|TBP|PUS1|H2AFX|TAP1|FOXP3|ILF2|TNFRSF1A|AR|PPM1A|CREB3|ILF3|PAX8|IFNG|CCNE1|TBL1XR1|DDIT3|TRAF6|HPRT1|ATF6|SQSTM1|TP53|TLR4|ATF4|CEBPA|SMARCD1|HDAC2|CEBPB|SHC1|HDAC1|CEBPG|ADRB1|RELA|PSMC3IP|CCNB1|NSD1|SCAP|MAPK1|PCBD2|TBL1X|ZNF148|CREBBP|USP21|NFYC|USP22|FOXJ2|NFKB1|USF1|KLF7|IL6|CDK7|SP1|REL|TCEA1|CTNNB1|CALR|LPIN2|N…
16579	4.025e-05	0.00081327	12	47	protein deubiquitination	USP8|USP15|USP20|TRRAP|USP4|USP10|USP21|USP33|USP11|USP22|USP2|OTUB1
44085	4.2214e-05	0.00084836	101	1034	cellular component biogenesis	DPAGT1|APP|IRS1|GTF2B|PARK2|PIM1|SMARCAD1|EIF2A|KCNH2|TSPYL2|DGAT1|RPS6|TSC2|SOAT2|CSNK2B|TFAM|HPRT1|TLN1|TP53|HIST1H2BC|CUL3|ARL2|PSEN1|CORO1A|HSP90B1|CCNB1|HMOX1|ASL|ATG5|SRPK2|PRNP|CREBBP|H3F3A|EIF2AK3|SMARCA5|PA2G4|H1F0|CDK7|MDM2|BCL2|HIST1H4H|TPP1|CALR|LSM14A|TUBA8|GPAA1|SUV39H1|PRKAG1|TAZ|HK2|MAP1LC3A|CASP8|H2AFJ|CTSD|NCK1|HSP90AA1|TBP|H2AFY|H2AFZ|TUBB|H2AFX|H2AFV|TRAF2|SIRT1|HIST2H2BE|TNFR…
6506	4.7342e-05	0.00094634	10	34	GPI anchor biosynthetic process	DPM1|PIGT|ALG9|PIGN|GPAA1|PIGP|ALG12|MPPE1|PIGL|PIGG
31497	4.7918e-05	0.00095276	17	87	chromatin assembly	TSPYL2|H2AFY|H2AFZ|H3F3A|H2AFX|SMARCA5|NAP1L3|H2AFV|NAP1L1|CENPA|HIST2H2BE|NAP1L4|H1F0|HIST3H2A|H2AFJ|HIST1H4H|HIST1H2BC
8633	5.0102e-05	0.00099091	8	22	activation of pro-apoptotic gene products	MAPK8|BCL2L11|CASP8|DLC1|BCL2|AKT1|TRAF2|BID
9891	5.184e-05	0.0010199	76	730	positive regulation of biosynthetic process	FOXA1|ATF2|APP|HSP90AB1|IRS1|HMGB1|TAZ|ETS1|RPS4X|MYC|CREB3L2|UBTF|AKT1|SMARCAD1|HSP90AA1|TBP|PUS1|TAP1|FOXP3|ILF2|TNFRSF1A|AR|PPM1A|CREB3|ILF3|PAX8|IFNG|CCNE1|TBL1XR1|DDIT3|TRAF6|PRKCQ|ATF6|SQSTM1|TP53|TLR4|ATF4|CEBPA|SMARCD1|HDAC2|CEBPB|SHC1|HDAC1|CEBPG|ADRB1|RELA|PSMC3IP|NSD1|HMOX1|SCAP|MAPK1|PCBD2|TBL1X|ZNF148|EIF2B5|CREBBP|USP21|NFYC|USP22|SAMD4A|FOXJ2|NFKB1|GCK|USF1|KLF7|IL6|CDK7|SP1|REL|TC…
33365	5.4565e-05	0.0010679	24	151	protein localization in organelle	RANBP2|PDIA3|KDELR1|GPAA1|ZBTB16|SRPR|TOMM34|TSC2|DBI|NCKIPSD|PPP3CA|IFNG|SEC61G|TOMM70A|LMNA|MDM2|AKT1|MAPK1|KDELR2|KDELR3|SEC61B|BID|TP53|RBM22
31398	5.9406e-05	0.0011485	18	97	positive regulation of protein ubiquitination	EPM2A|RPN2|HSPA5|SPHK1|RPN1|CUL1|PSMA7|PSMA5|PSMA6|UBL5|CCNB1|PSMB5|PSMC6|PSMD2|DNAJA3|PSME2|PIN1|STUB1
6901	5.934e-05	0.0011485	7	17	vesicle coating	COPB2|ARF1|COPB1|GBF1|EPS15|ARFGAP1|ARCN1
45075	5.9913e-05	0.0011485	5	8	regulation of interleukin-12 biosynthetic process	IFNG|TRAF6|REL|TLR4|RELA
70227	5.9913e-05	0.0011485	5	8	lymphocyte apoptosis	BCL2L11|DNAJA3|RPS6|AKT1|BAX
6505	6.2374e-05	0.0011896	10	35	GPI anchor metabolic process	DPM1|PIGT|ALG9|PIGN|GPAA1|PIGP|ALG12|MPPE1|PIGL|PIGG
9266	6.8344e-05	0.0012968	18	98	response to temperature stimulus	EIF2B5|EIF2B4|HDAC2|CLPB|HSPA1L|DHX9|HSPB1|ADRB1|ERO1L|SOD1|DNAJA1|CASP8|DNAJA3|DNAJA2|BCL2|AKT1|PRKCQ|RBBP7
8637	7.1094e-05	0.0013422	9	29	apoptotic mitochondrial changes	CASP7|BCL2|AKT1|BAX|PIM2|BAK1|BID|DNM1L|TP53
42542	7.2655e-05	0.0013647	14	65	response to hydrogen peroxide	PPP1R15B|SPHK1|PARK7|RELA|KLF2|SOD1|PRDX3|PRDX2|PPP2CB|DDIT3|PRDX1|CAT|BCL2|HMOX1
6754	7.5008e-05	0.0014019	17	90	ATP biosynthetic process	ATP8B4|ATP8A2|ATP8A1|ATP8B2|ATP8B1|ATP13A1|ATP10D|ATP2A3|ATP11C|ATP2A2|ATP1A3|ATP11B|ATP10A|ATP1A2|ATP2C1|ATP1B1|ATP6V0D1
43523	8.6643e-05	0.0016113	17	91	regulation of neuron apoptosis	ATF2|ROCK1|WFS1|ITSN1|FURIN|PSEN1|PCSK6|ESR1|SOD1|PRDX3|NMNAT1|DNAJC5|PPT1|BCL2|BAX|ATM|TP53
16568	8.9892e-05	0.0016557	39	311	chromatin modification	FOXA1|SUV39H2|SMARCD1|SETD2|HDAC2|HDAC3|TRRAP|HDAC1|EHMT2|SUV39H1|HDAC11|CXXC1|PHF21A|PAK1|RBBP4|VPS72|RBBP5|H2AFJ|NSD1|EP400|SMARCAD1|HMG20A|RBBP7|WHSC1L1|TSPYL2|SMARCE1|SUZ12|CREBBP|H2AFY|USP21|USP22|DAPK3|SMARCA5|SIRT1|FOXP3|TBL1XR1|BCOR|EZH1|RCOR1
9152	8.9918e-05	0.0016557	20	118	purine ribonucleotide biosynthetic process	ATP8B4|ATP8A2|ATP8A1|ATP8B2|ATP8B1|ATP13A1|ATP10D|ATP2A3|ATP11C|ATP2A2|ATP1A3|ATP11B|ATP10A|ATP1A2|AK5|ATP2C1|ATP1B1|ASL|ATP6V0D1|GART
70934	9.0899e-05	0.0016656	4	5	CRD-mediated mRNA stabilization	SYNCRIP|DHX9|IGF2BP1|YBX1
43029	9.1563e-05	0.0016696	7	18	T cell homeostasis	BCL2L11|DNAJA3|RPS6|BCL2|AKT1|FOXP3|CORO1A
45941	9.5736e-05	0.0017372	62	575	positive regulation of transcription	FOXA1|ATF2|APP|HMGB1|TAZ|ETS1|MYC|CREB3L2|UBTF|SMARCAD1|TBP|PUS1|TAP1|FOXP3|ILF2|TNFRSF1A|AR|PPM1A|CREB3|ILF3|PAX8|IFNG|CCNE1|TBL1XR1|DDIT3|TRAF6|ATF6|SQSTM1|TP53|TLR4|ATF4|CEBPA|SMARCD1|HDAC2|CEBPB|HDAC1|RELA|PSMC3IP|NSD1|SCAP|MAPK1|PCBD2|TBL1X|ZNF148|CREBBP|USP21|NFYC|USP22|FOXJ2|NFKB1|USF1|KLF7|IL6|CDK7|SP1|REL|TCEA1|CTNNB1|LPIN2|NFE2L2|IL17A|TAF1
22403	0.00010127	0.0018288	50	436	cell cycle phase	SUV39H2|APP|HK2|PPP3CA|PPP6C|CCND1|PIM1|AKT1|NEK1|NEK2|HORMAD2|PIM2|SKP2|TUBB|RPS6|H2AFX|CDC25A|CDC25B|CCNA1|ILF3|KIF2A|CCNE1|CKS2|KIF2C|SEH1L|HDAC3|DCTN1|CUL3|CUL1|PSMC3IP|VCPIP1|CCNB1|KATNA1|BUB3|BUB1|NEK8|NEK9|DYNC1H1|KLHDC3|UBE2I|NEK4|MRE11A|HSPA2|CDK6|CDK4|MDM2|BCL2|CDK10|ATM|TAF1
51101	0.00010273	0.0018461	24	157	regulation of DNA binding	FOXA1|HDAC2|SPHK1|CEBPG|TRAF2|HMGB1|SIRT1|FOXP3|RELA|IKBKB|PRDX3|PRDX2|IL6|DDIT3|TRAF6|DNAJA3|CSNK2B|CAT|PIM1|RPS3|HMOX1|TPP1|TLR4|MAPK3
46489	0.00010345	0.0018502	11	44	phosphoinositide biosynthetic process	DPM1|PIGT|ALG9|PIGN|GPAA1|PIGP|ALG12|MPPE1|PIGL|PIGG|PIK3C2A
7010	0.00010431	0.0018567	51	448	cytoskeleton organization	FHOD3|FHOD1|HK2|ARHGAP4|HK1|NEK2|NCK1|PRKCI|TUBB|KIF2A|DAAM1|CKS2|KIF2C|TLN1|DBN1|ARF6|SEH1L|HDAC3|ROCK1|CUL3|ARHGAP17|ATP2C1|CENPA|CORO1A|ADD1|FGD1|HSP90B1|NCKIPSD|FGD3|PAK1|FGD6|NUAK2|KATNA1|BUB3|MARK4|DYNC1H1|CORO2B|SOD1|FMNL3|EHD2|DIAPH3|FMNL2|DLC1|CAPZA1|CAPZA2|BCL2|TRIP10|CTNNB1|BAX|CALR|ATR
31400	0.0001051	0.001862	22	138	negative regulation of protein modification process	RPN2|USP4|PRKCD|RPN1|PSEN1|PAX5|TAZ|FOXP3|PSMA7|PARK2|PSMA5|PSMA6|CCNB1|PSMB5|PSMC6|BAG5|PSMD2|PSME2|BCOR|BUB3|VPS28|ATG5
18193	0.00011369	0.0020045	24	158	peptidyl-amino acid modification	PDGFRB|GSK3B|CREBBP|SETD2|RPN2|TUSC3|RPN1|STK4|SIRT1|DDOST|PAK1|MAPK8|SLK|IFNG|DAD1|STT3A|BCL2|AKT1|P4HB|STT3B|RAB6A|METAP1|TAF1|METAP2
10628	0.00011726	0.0020483	64	603	positive regulation of gene expression	FOXA1|ATF2|APP|HMGB1|TAZ|ETS1|MYC|CREB3L2|UBTF|SMARCAD1|TBP|PUS1|TAP1|FOXP3|ILF2|TNFRSF1A|AR|PPM1A|CREB3|ILF3|PAX8|IFNG|CCNE1|TBL1XR1|DDIT3|TRAF6|ATF6|SQSTM1|TP53|TLR4|ATF4|CEBPA|SMARCD1|HDAC2|CEBPB|HDAC1|RELA|PSMC3IP|MAPK9|NSD1|SCAP|MAPK1|PCBD2|TBL1X|ZNF148|CREBBP|USP21|NFYC|USP22|FOXJ2|ESR1|NFKB1|USF1|KLF7|IL6|CDK7|SP1|REL|TCEA1|CTNNB1|LPIN2|NFE2L2|IL17A|TAF1
31669	0.00011692	0.0020483	15	76	cellular response to nutrient levels	HSPA5|SPHK1|ASNS|EIF2AK4|PSEN1|SIRT1|USF1|MAP1LC3A|NUAK2|CCNE1|HMOX1|SQSTM1|TP53|CTSD|ATG5
31324	0.00012	0.0020864	79	786	negative regulation of cellular metabolic process	FOXA1|ACADVL|HSP90AB1|SUV39H1|HMGB1|TAZ|PARK2|YY1|VPS72|PSMD2|UBTF|AKT1|TSPYL2|USP4|PRKCD|USP2|PAX5|SIRT1|FOXP3|PSMA5|PSMA6|ILF3|TBL1XR1|TRAF6|PSME2|TP53|PFDN5|VPS28|CEBPA|PRKAA1|HDAC2|TSG101|HDAC3|RPN2|HDAC1|RPN1|FURIN|PSEN1|PSMA7|RELA|PHF21A|PRDX2|CCNB1|PSMB5|BAG5|NSD1|RAB23|IGF2BP1|RPS3|TBL1X|BUB3|ZNF148|ATG5|EIF2B5|SMARCE1|SUZ12|EIF2B4|UBE2I|ATP8B1|EIF2AK1|ZBTB16|EIF2AK3|SMARCA5|MRE11A|EIF2AK…
44271	0.0001265	0.0021891	40	327	cellular nitrogen compound biosynthetic process	CEBPA|DDC|ATP8A2|ATP8A1|ATP10D|ATP2A3|CPOX|ATP2A2|ATP1A3|ATP10A|DBI|ATP1A2|NRF1|AK5|ATP2C1|UROD|AKT1|ASL|PCBD2|ATP8B4|CHKB|GOT1|CHKA|ATP8B2|ATP8B1|ATP13A1|GOT2|ATP11C|ASNS|ATP11B|NMNAT2|PGD|ATP1B1|NMNAT1|ETNK2|HPRT1|ATP6V0D1|GART|NFE2L1|ATR
9205	0.00013209	0.0022754	19	112	purine ribonucleoside triphosphate metabolic process	ATP8B4|ATP8A2|ATP8A1|ATP8B2|ATP8B1|ATP13A1|VPS4B|ATP10D|ATP2A3|ATP11C|ATP2A2|ATP1A3|ATP11B|ATP10A|ATP1A2|AK5|ATP2C1|ATP1B1|ATP6V0D1
35466	0.00013547	0.0023145	96	1002	regulation of signaling pathway	ITSN2|FOXA1|SLC35B2|APP|HSP90AB1|IRS1|USP33|ITSN1|PIK3CB|PARK7|FOXM1|PCSK6|TAZ|PARK2|IKBKB|UBL5|CASP8|CCND1|AKT1|PIM2|FBXO8|DBNL|SPHK1|PRKCD|TSC2|TRAF2|GAPVD1|GMIP|ARFGAP3|SIRT1|DUSP6|ARFGAP1|TNFRSF1A|AR|PPM1A|IFNG|TBC1D5|TRAF6|CAT|HCLS1|SQSTM1|TP53|TLR4|PFDN5|ARF6|PRKAA1|CANT1|HDAC3|SHC1|CUL3|FURIN|PSEN1|ATP2C1|AGPAT1|STK4|AGPAT2|RELA|FGD1|STK3|FGD3|PRDX2|PPP2CB|PAK1|FGD6|PRDX1|RAB23|HMOX1|PAK3|…
6417	0.0001356	0.0023145	23	150	regulation of translation	EIF2B5|EIF5B|PPP1R15B|EIF2B4|APP|EIF2AK1|EIF2AK3|SAMD4A|HSPB1|EIF2AK4|PA2G4|EIF2S1|RPS4X|IL6|IGF2BP1|AKT1|MAPK1|CALR|LSM14B|LSM14A|METAP1|NCK1|EIF2A
45935	0.00014006	0.0023798	68	655	positive regulation of nucleobase, nucleoside, nucleotide and nucleic acid metabolic process	FOXA1|ATF2|APP|HMGB1|TAZ|ETS1|MYC|CREB3L2|UBTF|SMARCAD1|TBP|PUS1|H2AFX|TAP1|FOXP3|ILF2|TNFRSF1A|AR|PPM1A|CREB3|ILF3|PAX8|IFNG|CCNE1|TBL1XR1|DDIT3|TRAF6|ATF6|SQSTM1|TP53|TLR4|ATF4|CEBPA|SMARCD1|HDAC2|CEBPB|SHC1|HDAC1|CEBPG|ADRB1|RELA|PSMC3IP|CCNB1|NSD1|SCAP|MAPK1|PCBD2|TBL1X|ZNF148|CREBBP|USP21|NFYC|USP22|FOXJ2|NFKB1|USF1|KLF7|IL6|CDK7|SP1|REL|TCEA1|CTNNB1|CALR|LPIN2|NFE2L2|IL17A|TAF1
43524	0.00014214	0.0023933	12	53	negative regulation of neuron apoptosis	PRDX3|ATF2|ROCK1|WFS1|DNAJC5|ITSN1|PPT1|BCL2|FURIN|PSEN1|PCSK6|SOD1
2260	0.00014175	0.0023933	8	25	lymphocyte homeostasis	IKBKB|BCL2L11|DNAJA3|RPS6|BCL2|AKT1|FOXP3|CORO1A
19725	0.00014873	0.0024885	52	466	cellular homeostasis	APP|RYR2|TUSC3|ATP2A2|PIK3CB|PARK7|HK2|HERPUD1|PPP3CA|MYC|SLC12A7|SLC39A4|KCNH2|PDIA3|GAA|TRPC1|PDIA6|PDIA4|AFG3L2|DDIT3|ITPR1|ATP1A2|SRI|PSEN1|ATP2C1|HSP90B1|PRDX3|PRDX2|PRDX5|PRDX4|PRDX1|ASNA1|BAK1|TXNDC5|MCL1|SLC12A2|EIF2B5|PRNP|EIF2B4|SLC12A4|SLC12A5|WFS1|GBF1|DNAJC16|SOD1|MAFG|DNAJC10|PPT1|BCL2|BAX|P4HB|CALR
9199	0.00014912	0.0024885	19	113	ribonucleoside triphosphate metabolic process	ATP8B4|ATP8A2|ATP8A1|ATP8B2|ATP8B1|ATP13A1|VPS4B|ATP10D|ATP2A3|ATP11C|ATP2A2|ATP1A3|ATP11B|ATP10A|ATP1A2|AK5|ATP2C1|ATP1B1|ATP6V0D1
9150	0.00015419	0.0025616	21	132	purine ribonucleotide metabolic process	ATP8B4|ATP8A2|ATP8A1|ATP8B2|ATP8B1|ATP13A1|VPS4B|ATP10D|ATP2A3|ATP11C|ATP2A2|ATP1A3|ATP11B|ATP10A|ATP1A2|AK5|ATP2C1|ATP1B1|ASL|ATP6V0D1|GART
51128	0.00016898	0.002795	58	539	regulation of cellular component organization	GSK3B|CLIC4|FAF1|HMGB1|TAZ|PARK2|SCAMP5|UBL5|SLK|MYC|AKT1|NEK2|NCK1|PRKCI|SPHK1|TSC2|PAX5|FOXP3|HCFC1|CFDP1|PRKCQ|TP53|DBN1|ARF6|RAB5B|CUL7|HDAC2|SRC|ATP10A|PSEN1|CORO1A|RTN4|ADD1|FGD1|FGD3|CCNB1|FGD6|BAG5|KATNA1|BUB1|RAB4A|GOLPH3|EHD4|SYNJ1|ARPC3|DLC1|CAPZA1|CAPZA2|PPT1|PIN1|CTNNB1|STUB1|TPP1|ATM|CALR|BCOR|HSPA1B|TAF1
30036	0.00017251	0.0028282	31	234	actin cytoskeleton organization	FHOD3|ROCK1|FHOD1|CUL3|ARHGAP17|ATP2C1|CORO1A|ADD1|FGD1|HSP90B1|FGD3|FGD6|NUAK2|NCK1|PRKCI|CORO2B|FMNL3|EHD2|DIAPH3|FMNL2|DAAM1|DLC1|CAPZA1|CAPZA2|BCL2|TRIP10|CALR|TLN1|DBN1|ARF6|ATR
6497	0.00017188	0.0028282	12	54	protein amino acid lipidation	DPM1|PIGT|ALG9|PIGN|GPAA1|PIGP|ALG12|MPPE1|PIGL|PIGG|ZDHHC1|ATG7
1889	0.00017412	0.0028421	13	62	liver development	CEBPA|HDAC3|CEBPG|ASNS|RELA|CCND1|ALDH2|SP1|CCNE1|SP3|CTNNB1|ARF6|ALDH9A1
9259	0.00017901	0.0029093	22	143	ribonucleotide metabolic process	ATP8B4|ATP8A2|ATP8A1|ATP8B2|ENTPD4|ATP8B1|ATP13A1|VPS4B|ATP10D|ATP2A3|ATP11C|ATP2A2|ATP1A3|ATP11B|ATP10A|ATP1A2|AK5|ATP2C1|ATP1B1|ASL|ATP6V0D1|GART
51254	0.00019159	0.0031003	55	506	positive regulation of RNA metabolic process	FOXA1|ATF2|APP|HMGB1|TAZ|ETS1|UBTF|PUS1|TAP1|FOXP3|ILF2|TNFRSF1A|AR|PPM1A|CREB3|ILF3|PAX8|IFNG|CCNE1|TBL1XR1|TRAF6|ATF6|SQSTM1|TP53|TLR4|ATF4|CEBPA|SMARCD1|HDAC2|CEBPB|HDAC1|RELA|PSMC3IP|CCNB1|NSD1|SCAP|PCBD2|TBL1X|ZNF148|CREBBP|USP21|NFYC|FOXJ2|USF1|KLF7|IL6|CDK7|SP1|REL|TCEA1|CTNNB1|LPIN2|NFE2L2|IL17A|TAF1
9100	0.00019754	0.0031723	27	194	glycoprotein metabolic process	POMT2|DPAGT1|RPN2|TUSC3|POMT1|NGLY1|RPN1|PSEN1|PCSK6|MAN1A2|MAN1C1|EDEM3|ALG8|ALG6|FBXO2|ALG5|ALG3|ALG12|DDOST|DPM1|COL2A1|DAD1|STT3A|STT3B|MAN1B1|GCS1|IL17A
51656	0.00019774	0.0031723	14	71	establishment of organelle localization	COPB2|ARF1|TMED10|SEH1L|COPB1|GBF1|WIPI1|PSEN1|CENPA|ARFGAP1|GCK|ARCN1|CCNB1|SNAP29
61008	0.00020628	0.0032952	13	63	hepaticobiliary system development	CEBPA|HDAC3|CEBPG|ASNS|RELA|CCND1|ALDH2|SP1|CCNE1|SP3|CTNNB1|ARF6|ALDH9A1
15914	0.00021529	0.0034244	9	33	phospholipid transport	ATP8B4|ATP8A2|ATP8A1|ATP8B2|ATP8B1|ATP10D|ATP11C|ATP11B|ATP10A
34097	0.00021928	0.0034732	18	107	response to cytokine stimulus	PCSK1|PRKCI|ENDOG|SRC|SPHK1|CORO1A|DDOST|RELA|KLF2|CASP8|SYNJ1|CCNE1|TRAF6|DNAJA3|BCL2|CTNNB1|CFTR|MCL1
9141	0.00022633	0.0035696	20	126	nucleoside triphosphate metabolic process	ATP8B4|ATP8A2|ENTPD3|ATP8A1|ATP8B2|ATP8B1|ATP13A1|VPS4B|ATP10D|ATP2A3|ATP11C|ATP2A2|ATP1A3|ATP11B|ATP10A|ATP1A2|AK5|ATP2C1|ATP1B1|ATP6V0D1
51090	0.00023633	0.0036962	21	136	regulation of transcription factor activity	FOXA1|HDAC2|SPHK1|CEBPG|TRAF2|SIRT1|FOXP3|RELA|IKBKB|PRDX3|PRDX2|IL6|DDIT3|TRAF6|DNAJA3|CAT|PIM1|RPS3|HMOX1|TLR4|MAPK3
90046	0.00023633	0.0036962	21	136	regulation of transcription regulator activity	FOXA1|HDAC2|SPHK1|CEBPG|TRAF2|SIRT1|FOXP3|RELA|IKBKB|PRDX3|PRDX2|IL6|DDIT3|TRAF6|DNAJA3|CAT|PIM1|RPS3|HMOX1|TLR4|MAPK3
9144	0.00023809	0.0037082	19	117	purine nucleoside triphosphate metabolic process	ATP8B4|ATP8A2|ATP8A1|ATP8B2|ATP8B1|ATP13A1|VPS4B|ATP10D|ATP2A3|ATP11C|ATP2A2|ATP1A3|ATP11B|ATP10A|ATP1A2|AK5|ATP2C1|ATP1B1|ATP6V0D1
9260	0.00025226	0.0038965	20	127	ribonucleotide biosynthetic process	ATP8B4|ATP8A2|ATP8A1|ATP8B2|ATP8B1|ATP13A1|ATP10D|ATP2A3|ATP11C|ATP2A2|ATP1A3|ATP11B|ATP10A|ATP1A2|AK5|ATP2C1|ATP1B1|ASL|ATP6V0D1|GART
6333	0.00025226	0.0038965	20	127	chromatin assembly or disassembly	TSPYL2|SMARCE1|SUV39H2|H2AFY|H2AFZ|SUV39H1|H3F3A|H2AFX|SMARCA5|NAP1L3|H2AFV|NAP1L1|CENPA|HIST2H2BE|NAP1L4|H1F0|HIST3H2A|H2AFJ|HIST1H4H|HIST1H2BC
45893	0.00025674	0.0039493	54	500	positive regulation of transcription, DNA-dependent	FOXA1|ATF2|APP|HMGB1|TAZ|ETS1|UBTF|PUS1|TAP1|FOXP3|ILF2|TNFRSF1A|AR|PPM1A|CREB3|ILF3|PAX8|IFNG|CCNE1|TBL1XR1|TRAF6|ATF6|SQSTM1|TP53|TLR4|ATF4|CEBPA|SMARCD1|HDAC2|CEBPB|HDAC1|RELA|PSMC3IP|NSD1|SCAP|PCBD2|TBL1X|ZNF148|CREBBP|USP21|NFYC|FOXJ2|USF1|KLF7|IL6|CDK7|SP1|REL|TCEA1|CTNNB1|LPIN2|NFE2L2|IL17A|TAF1
2262	0.00025833	0.0039575	4	6	myeloid cell homeostasis	IL6|BCL2L11|IFNG|SOD1
43393	0.00026482	0.0040404	10	41	regulation of protein binding	GSK3B|PRKCD|EIF2AK3|BCL2|BAX|PSEN1|PARK7|BAK1|ADD1|ATR
44283	0.00028183	0.0042824	49	443	small molecule biosynthetic process	DPAGT1|ATP8A2|ATP8A1|PRKAG1|ATP2A3|ATP2A2|ELOVL4|SPHK1|ATP11C|ELOVL6|ATP11B|PGD|ATP1B1|HPRT1|HAGH|ATP6V0D1|GART|ATF3|SLC27A5|ATF4|PRKAA1|DDC|PRKAA2|ATP10D|ATP1A3|ATP10A|ATP1A2|AK5|ATP2C1|AGPAT1|AGPAT2|ASL|PCK2|ATP8B4|CHKB|PMM1|GOT1|CHKA|ATP8B2|ATP8B1|ATP13A1|GOT2|GBF1|ASNS|NMNAT2|NMNAT1|ETNK2|FASN|ATR
9206	0.0002857	0.0043236	17	100	purine ribonucleoside triphosphate biosynthetic process	ATP8B4|ATP8A2|ATP8A1|ATP8B2|ATP8B1|ATP13A1|ATP10D|ATP2A3|ATP11C|ATP2A2|ATP1A3|ATP11B|ATP10A|ATP1A2|ATP2C1|ATP1B1|ATP6V0D1
6164	0.00029025	0.0043597	21	138	purine nucleotide biosynthetic process	ATP8B4|ATP8A2|ATP8A1|ATP8B2|ATP8B1|ATP13A1|ATP10D|ATP2A3|ATP11C|ATP2A2|ATP1A3|ATP11B|ATP10A|ATP1A2|AK5|ATP2C1|ATP1B1|ASL|HPRT1|ATP6V0D1|GART
33689	0.00029041	0.0043597	3	3	negative regulation of osteoblast proliferation	EIF2AK1|BCL2|EIF2AK2
42594	0.0002949	0.0044094	12	57	response to starvation	MAP1LC3A|NUAK2|HSPA5|SPHK1|ASNS|EIF2AK4|PSEN1|SIRT1|SQSTM1|TP53|CTSD|ATG5
65009	0.00029843	0.0044443	99	1063	regulation of molecular function	FOXA1|ATF2|APP|CERK|IRS1|PDCD6|PARK7|CCND1|PSMD2|PIM1|AKT1|TSPYL2|PRKCD|TSC2|FOXP3|CDC25A|AR|DDIT3|CSNK2B|PSME2|AMPH|TP53|CERKL|PXK|RPN2|SHC1|RPN1|CUL1|ADRB1|PSEN1|HSP90B1|PRDX3|PRDX2|CCNB1|BAG5|HMOX1|HSPA5|EIF2AK3|NFKB1|IL6|CDK7|BCL2|PIN1|CYCS|TPP1|ATR|GSK3B|PRKAG1|PIK3CB|HMGB1|TAZ|HERPUD1|CKS1B|IKBKB|CASP9|UBL5|DBNL|SPHK1|TRAF2|GMIP|ARFGAP3|SIRT1|DUSP6|ARFGAP1|SENP1|PSMA5|PSMA6|IFNG|TBC1D5|TRAF…
6629	0.00031079	0.00461	81	835	lipid metabolic process	DPAGT1|ACADVL|PIGT|CERK|PIGN|GPAA1|PIGP|PRKAG1|DBI|PIK3CB|TAZ|PIK3C2A|PIK3CG|SMPD2|ARV1|COL4A3BP|SPTLC1|HINT2|OSBP|PCYT1B|ALG9|PCYT1A|ELOVL4|DGAT1|GGPS1|SPHK1|PLA2G4B|ELOVL6|OCRL|ALG12|SIRT1|TNFRSF1A|DPM1|SOAT2|CAT|PPAP2A|PLAA|PIK3C3|CYP2E1|MPPE1|PIGL|PIGG|SLC27A3|SLC27A5|CFTR|PRKAA1|PRKAA2|INSIG2|ARL1|HMGCR|PLA2G6|AGPAT1|AGPAT2|ADIPOR2|RDH12|INPP5F|RDH11|ORMDL2|ORMDL3|SCAP|CEPT1|MBTPS1|OSBPL8|CH…
6869	0.00032104	0.0047309	21	139	lipid transport	OSBPL8|ATP8B4|ATP8A2|OSBPL6|CHKA|ATP8A1|ATP8B2|ATP8B1|VPS4B|GOT2|ATP10D|OSBPL2|ATP11C|ATP11B|ATP10A|COL4A3BP|SOAT2|OSBP|OSBPL1A|SLC27A5|CFTR
9145	0.00032273	0.0047309	17	101	purine nucleoside triphosphate biosynthetic process	ATP8B4|ATP8A2|ATP8A1|ATP8B2|ATP8B1|ATP13A1|ATP10D|ATP2A3|ATP11C|ATP2A2|ATP1A3|ATP11B|ATP10A|ATP1A2|ATP2C1|ATP1B1|ATP6V0D1
9201	0.00032273	0.0047309	17	101	ribonucleoside triphosphate biosynthetic process	ATP8B4|ATP8A2|ATP8A1|ATP8B2|ATP8B1|ATP13A1|ATP10D|ATP2A3|ATP11C|ATP2A2|ATP1A3|ATP11B|ATP10A|ATP1A2|ATP2C1|ATP1B1|ATP6V0D1
51438	0.00032423	0.0047343	15	83	regulation of ubiquitin-protein ligase activity	RPN2|RPN1|CUL1|PSMA7|PSMA5|PSMA6|UBL5|CCNB1|PSMB5|PSMC6|BAG5|PSMD2|PSME2|PIN1|BUB3
80135	0.00034631	0.005037	20	130	regulation of cellular response to stress	DBNL|HDAC3|EIF2AK1|CEBPG|H2AFX|TRAF2|FOXM1|SIRT1|RTN4|PAK1|TAOK3|PRDX1|TRAF6|MDM2|RPS3|AKT1|ATM|MAP4K5|TLR4|ATR
31401	0.00035876	0.0051778	30	233	positive regulation of protein modification process	RPN2|RPN1|CUL1|PSEN1|PSMA7|UBL5|CCNB1|PSMB5|CCND1|PSMD2|ATG7|EPM2A|HSPA5|SPHK1|MRE11A|FOXP3|PSMA5|PSMA6|IL6|PSMC6|IFNG|DNAJA3|DLC1|BCL2|PSME2|PIN1|HCLS1|STUB1|TP53|TLR4
9101	0.00035813	0.0051778	22	150	glycoprotein biosynthetic process	POMT2|DPAGT1|ALG8|ALG6|RPN2|TUSC3|POMT1|ALG5|RPN1|ALG3|ALG12|PSEN1|DDOST|DPM1|MAN1A2|DAD1|STT3A|MAN1C1|STT3B|MAN1B1|GCS1|IL17A
6914	0.00040134	0.0057701	10	43	autophagy	MAP1LC3B|MAP1LC3A|LAMP1|RAB24|WIPI1|PSEN1|ATG7|SQSTM1|CTSD|ATG5
44262	0.00040444	0.0057923	43	380	cellular carbohydrate metabolic process	POMT2|DPAGT1|GSK3B|RPN2|TUSC3|POMT1|RPN1|PSEN1|HK2|HK1|LDHA|MAN1A2|MAN1C1|DLAT|PCK2|EPM2A|ALG8|MGAM|PMM1|GOT1|ALG6|GAA|ALG5|TALDO1|ALG3|ALG12|SYNJ2|BPGM|PGD|DDOST|GCK|USF1|DPM1|DAD1|STT3A|GAPDHS|STT3B|MAN1B1|GPD1L|GCS1|ATF3|ATF4|IL17A
9142	0.00040943	0.0058415	17	103	nucleoside triphosphate biosynthetic process	ATP8B4|ATP8A2|ATP8A1|ATP8B2|ATP8B1|ATP13A1|ATP10D|ATP2A3|ATP11C|ATP2A2|ATP1A3|ATP11B|ATP10A|ATP1A2|ATP2C1|ATP1B1|ATP6V0D1
42158	0.00041299	0.0058698	12	59	lipoprotein biosynthetic process	DPM1|PIGT|ALG9|PIGN|GPAA1|PIGP|ALG12|MPPE1|PIGL|PIGG|ZDHHC1|ATG7
51881	0.00041765	0.0059136	5	11	regulation of mitochondrial membrane potential	PRDX3|BCL2|BAX|BAK1|SOD1
16032	0.00045443	0.00641	13	68	viral reproduction	TSG101|DERL1|TAP2|TAP1|FURIN|HCFC2|HTATSF1|USF1|HCFC1|CREB3|RRAGA|VAPB|PPIA
302	0.00048205	0.0067487	15	86	response to reactive oxygen species	PPP1R15B|SPHK1|PARK7|RELA|KLF2|SOD1|PRDX3|PRDX2|PPP2CB|PRDX5|DDIT3|PRDX1|CAT|BCL2|HMOX1
51340	0.00048205	0.0067487	15	86	regulation of ligase activity	RPN2|RPN1|CUL1|PSMA7|PSMA5|PSMA6|UBL5|CCNB1|PSMB5|PSMC6|BAG5|PSMD2|PSME2|PIN1|BUB3
30029	0.00051899	0.0072131	31	249	actin filament-based process	FHOD3|ROCK1|FHOD1|CUL3|ARHGAP17|ATP2C1|CORO1A|ADD1|FGD1|HSP90B1|FGD3|FGD6|NUAK2|NCK1|PRKCI|CORO2B|FMNL3|EHD2|DIAPH3|FMNL2|DAAM1|DLC1|CAPZA1|CAPZA2|BCL2|TRIP10|CALR|TLN1|DBN1|ARF6|ATR
10551	0.00051908	0.0072131	22	154	regulation of gene-specific transcription from RNA polymerase II promoter	FOXA1|ATF2|CEBPA|HDAC2|HDAC3|HDAC1|SIRT1|FOXP3|ETS1|NFKB1|USF1|YY1|AR|PAK1|TBL1XR1|SCAP|CTNNB1|BCOR|TBL1X|TP53|TLR4|TAF1
31668	0.0005362	0.0074234	16	96	cellular response to extracellular stimulus	HSPA5|SPHK1|ASNS|EIF2AK4|PSEN1|SIRT1|USF1|LDHA|MAP1LC3A|NUAK2|CCNE1|HMOX1|SQSTM1|TP53|CTSD|ATG5
7346	0.00054354	0.0074755	24	175	regulation of mitotic cell cycle	FOXA1|APP|CUL7|HDAC3|TRRAP|SPHK1|USP22|RPS6|USP2|ASNS|UBL5|CCNB1|CCND1|MDM2|BCL2|PIN1|CDK10|PIM3|NEK2|PRKCQ|ATM|TP53|BUB1|ILKAP
51100	0.00054571	0.0074755	14	78	negative regulation of binding	GSK3B|HDAC2|PRKCD|CEBPG|PARK7|SIRT1|FOXP3|PRDX2|DDIT3|DNAJA3|CAT|PIM1|RPS3|HMOX1
10149	0.00054796	0.0074755	6	17	senescence	PRKCD|ATM|CALR|FOXM1|TP53|ATR
7032	0.00054796	0.0074755	6	17	endosome organization	USP8|RAB5B|VPS4B|RAB22A|HK2|HK1
9892	0.00056389	0.0076648	82	864	negative regulation of metabolic process	FOXA1|ACADVL|HSP90AB1|SUV39H1|HMGB1|TAZ|PARK2|YY1|VPS72|PSMD2|UBTF|AKT1|TSPYL2|USP4|PRKCD|USP2|PAX5|SIRT1|FOXP3|PSMA5|PSMA6|ILF3|TBL1XR1|TRAF6|PSME2|TP53|PFDN5|VPS28|CEBPA|PRKAA1|HDAC2|TSG101|HDAC3|RPN2|HDAC1|RPN1|FURIN|PSEN1|PSMA7|RELA|PHF21A|PRDX2|CCNB1|PSMB5|BAG5|NSD1|RAB23|IGF2BP1|RPS3|SCAP|TBL1X|BUB3|ZNF148|ATG5|EIF2B5|SMARCE1|SUZ12|EIF2B4|UBE2I|ATP8B1|EIF2AK1|ZBTB16|EIF2AK3|SMARCA5|MRE11A|E…
22415	0.0005687	0.0076786	12	61	viral reproductive process	CREB3|RRAGA|TSG101|VAPB|DERL1|TAP2|TAP1|FURIN|HTATSF1|PPIA|USF1|HCFC1
183	0.00057107	0.0076786	4	7	chromatin silencing at rDNA	SUV39H1|SMARCA5|UBTF|SIRT1
46839	0.00057107	0.0076786	4	7	phospholipid dephosphorylation	INPP5F|PPAP2A|OCRL|SYNJ2
71496	0.00060344	0.0080848	16	97	cellular response to external stimulus	HSPA5|SPHK1|ASNS|EIF2AK4|PSEN1|SIRT1|USF1|LDHA|MAP1LC3A|NUAK2|CCNE1|HMOX1|SQSTM1|TP53|CTSD|ATG5
45787	0.00060813	0.0081185	13	70	positive regulation of cell cycle	FOXA1|APP|SPHK1|USP22|USP2|ASNS|HCFC1|CCNB1|CCND1|PIM1|MDM2|AKT1|CALR
31397	0.00062358	0.0082951	14	79	negative regulation of protein ubiquitination	RPN2|USP4|RPN1|PSMA7|PSMA5|PSMA6|PSMB5|PSMC6|BAG5|PSMD2|PSME2|BUB3|VPS28|ATG5
16311	0.00062848	0.0083307	21	146	dephosphorylation	EPM2A|PTPN1|OCRL|SYNJ2|PTPN23|DUSP6|CDC25A|CDC14A|CDC25B|PPM1G|PPM1A|PPP3CA|PPP6C|PPP2CB|PPM1B|SYNJ1|INPP5F|CTDSP2|PPAP2A|BCL2|ILKAP
9411	0.0006634	0.0087625	12	62	response to UV	CASP7|MAPK8|CCND1|CAT|BCL2|AKT1|UBE4B|GTF2H2|TP53|RELA|USF1|ATR
90181	0.00067701	0.0089108	5	12	regulation of cholesterol metabolic process	PRKAA1|ACADVL|TAP1|SCAP|SOD1
34599	0.00070244	0.009213	11	54	cellular response to oxidative stress	PRDX3|PRDX2|TRAP1|PRDX5|SPHK1|PRDX1|CAT|PIM1|HMOX1|KLF2|SOD1
31667	0.0007287	0.0095241	30	243	response to nutrient levels	PCSK1|CEBPA|RYR2|PSEN1|ADIPOR2|RELA|MAP1LC3A|NUAK2|CCND1|AKT1|HMOX1|CTSD|MEST|ATG5|VCAM1|HSPA5|SPHK1|ASNS|EIF2AK4|SIRT1|USF1|SOD1|SYNJ1|SOAT2|CCNE1|DAD1|DDIT3|BCL2|SQSTM1|TP53
43489	0.00077616	0.010074	6	18	RNA stabilization	ATF2|SYNCRIP|DHX9|IGF2BP1|PABPC1|YBX1
48255	0.00077616	0.010074	6	18	mRNA stabilization	ATF2|SYNCRIP|DHX9|IGF2BP1|PABPC1|YBX1
51443	0.00080353	0.010393	13	72	positive regulation of ubiquitin-protein ligase activity	RPN2|RPN1|CUL1|PSMA7|PSMA5|PSMA6|UBL5|CCNB1|PSMB5|PSMC6|PSMD2|PSME2|PIN1
42157	0.00080782	0.010412	14	81	lipoprotein metabolic process	PIGT|ALG9|PIGN|GPAA1|PIGP|ALG12|ZDHHC1|DPM1|PPT1|ATM|MPPE1|PIGL|PIGG|ATG7
23052	0.00085817	0.011024	247	3127	signaling	ATF2|APP|CERK|TRRAP|ITSN1|ARAF|AKT1|TRIM23|EIF2A|PRKCI|PRKCH|CSNK2A1|STARD8|DAPK3|PRKCD|GAPVD1|AR|AFG3L2|RRAGC|DDIT3|CSNK2B|PRKCQ|PRKD2|ATF6|TP53|RIN2|CERKL|INPP5B|PRDX2|PRDX4|INPP5F|HMOX1|SCAP|SRPK2|TRAP1|CREBBP|STARD13|EIF2AK1|EIF2AK3|EIF2AK2|RAB39B|EIF2AK4|PPT1|HIST1H4H|ATM|CALR|ATR|ARF3|ARF4|PCSK1|ARF1|FAF1|PRKAG1|RAB22A|ARHGAP4|HERPUD1|IKBKB|SMPD2|PPP3CA|HINT1|KIF1B|TMED1|GPR37|DBNL|SPHK1|GM…
23033	0.00093415	0.011958	173	2096	signaling pathway	APP|CERK|IRS1|ITSN1|ARAF|ERO1L|SLK|CCND1|AKT1|TRIM23|EIF2A|PDGFRB|IGFBP1|RAB2B|MAP2K4|CSNK1G3|PRKCI|PRKCH|CSNK2A1|DAPK3|PRKCD|RPS6|TSC2|AR|RAB30|RAB36|RRAGC|CCNE1|TBL1XR1|DDIT3|CSNK2B|SCG5|PRKCQ|PRKD2|ATF6|SQSTM1|TP53|RIN2|CSNK1G2|ARL8B|IFNAR1|CERKL|RAB5B|SHC1|INSIG2|ARL1|ARL2|KLHL12|ADRB1|PSEN1|STK4|ADIPOR2|SLC9A1|STK3|PRDX2|PRDX4|BAG1|HMOX1|SCAP|RAB6A|MAP2K7|MARK2|SRPK2|TRAP1|RAB4A|HSPA5|WFS1|E…
10876	0.00098134	0.01252	21	151	lipid localization	OSBPL8|ATP8B4|ATP8A2|OSBPL6|CHKA|ATP8A1|ATP8B2|ATP8B1|VPS4B|GOT2|ATP10D|OSBPL2|ATP11C|ATP11B|ATP10A|COL4A3BP|SOAT2|OSBP|OSBPL1A|SLC27A5|CFTR
8635	0.0010822	0.013666	4	8	activation of caspase activity by cytochrome c	CASP9|CYCS|BAX|TP53
71108	0.0010822	0.013666	4	8	protein K48-linked deubiquitination	USP8|USP20|USP33|OTUB1
6895	0.0010822	0.013666	4	8	Golgi to endosome transport	MON2|RAB14|AP2A1|WIPI1
43497	0.0011041	0.013666	3	4	regulation of protein heterodimerization activity	BCL2|BAX|BAK1
51708	0.0011041	0.013666	3	4	intracellular protein transport in other organism involved in symbiotic interaction	DERL1|TAP2|TAP1
19060	0.0011041	0.013666	3	4	intracellular transport of viral proteins in host cell	DERL1|TAP2|TAP1
46719	0.0011041	0.013666	3	4	regulation of viral protein levels in host cell	DERL1|TAP2|TAP1
30581	0.0011041	0.013666	3	4	symbiont intracellular protein transport in host	DERL1|TAP2|TAP1
6926	0.0011041	0.013666	3	4	virus-infected cell apoptosis	EIF2AK1|EIF2AK3|EIF2AK2
6979	0.0011169	0.013779	24	184	response to oxidative stress	PPP1R15B|PRNP|TRAP1|TOR1A|SPHK1|PSEN1|PARK7|OXSR1|RELA|KLF2|SOD1|PRDX3|PRDX2|PPP2CB|PRDX5|STK25|DDIT3|PRDX1|CAT|PIM1|BCL2|HMOX1|TLR4|MARK2
43433	0.0011288	0.013834	11	57	negative regulation of transcription factor activity	PRDX2|HDAC2|DDIT3|DNAJA3|CAT|CEBPG|PIM1|RPS3|HMOX1|SIRT1|FOXP3
90048	0.0011288	0.013834	11	57	negative regulation of transcription regulator activity	PRDX2|HDAC2|DDIT3|DNAJA3|CAT|CEBPG|PIM1|RPS3|HMOX1|SIRT1|FOXP3
8610	0.001142	0.01395	38	341	lipid biosynthetic process	DPAGT1|PRKAA1|PIGT|PRKAA2|PIGN|GPAA1|PIGP|PRKAG1|HMGCR|PLA2G6|TAZ|AGPAT1|PIK3C2A|AGPAT2|SMPD2|SPTLC1|HINT2|CEPT1|PCYT1B|ALG9|PCYT1A|CHKB|ELOVL4|DGAT1|CHKA|GGPS1|SPHK1|GBF1|ELOVL6|ALG12|DPM1|ETNK2|FASN|CHPT1|MPPE1|PIGL|PIGG|CFTR
32446	0.0011587	0.014108	26	206	protein modification by small protein conjugation	TSG101|CUL3|CUL1|RNF5|PARK2|VCPIP1|SUMO2|AKT1|TRIM23|EPM2A|UBE2F|SUZ12|FBXO2|AMFR|USP22|UBE2G1|UBE4B|TRAF2|UBE2G2|RBX1|UFM1|TRAF6|MDM2|UFC1|BCL2|STUB1
10038	0.0011641	0.014128	21	153	response to metal ion	PCSK1|PRNP|RYR2|CLIC4|PEF1|SPHK1|PDCD6|TRPC1|ENTPD6|CPOX|NDRG1|ACTB|SOD1|MAPK9|CCNB1|MAPK8|CASP8|CCND1|BCL2|CTNNB1|TFF1
42176	0.0011937	0.014393	13	75	regulation of protein catabolic process	HSP90AB1|RPN2|FAF1|RPN1|FURIN|RELA|IFNG|PSMD2|SUMO2|MDM2|AKT1|STUB1|TAF1
51351	0.0011937	0.014393	13	75	positive regulation of ligase activity	RPN2|RPN1|CUL1|PSMA7|PSMA5|PSMA6|UBL5|CCNB1|PSMB5|PSMC6|PSMD2|PSME2|PIN1
34621	0.0012929	0.015503	39	355	cellular macromolecular complex subunit organization	SEH1L|SRC|ARL2|TAZ|CENPA|H2AFJ|EPS15|NCK1|EIF2A|TSPYL2|SMARCE1|SRPK2|HSP90AA1|H2AFY|H2AFZ|TUBB|H3F3A|RPS6|H2AFX|SMARCA5|NAP1L3|H2AFV|NAP1L1|HIST2H2BE|NAP1L4|H1F0|HIST3H2A|CSNK2B|NDUFS4|TCP1|XRN2|TFAM|HIST1H4H|KIF2C|CALR|LSM14A|TAF1|TUBA8|HIST1H2BC
35467	0.001294	0.015503	31	263	negative regulation of signaling pathway	HDAC3|IRS1|CUL3|FOXM1|TAZ|STK4|RELA|STK3|PRDX2|UBL5|PPP2CB|CCND1|AKT1|PTPN1|HSPA5|PRKCD|TSC2|GTF2H2|SIRT1|DUSP6|TAOK3|SP1|DNAJA3|DLC1|MDM2|PIN1|CALR|TP53|TLR4|PFDN5|EZH1
9991	0.0013759	0.016432	31	264	response to extracellular stimulus	PCSK1|CEBPA|RYR2|PSEN1|ADIPOR2|RELA|LDHA|MAP1LC3A|NUAK2|CCND1|AKT1|HMOX1|CTSD|MEST|ATG5|VCAM1|HSPA5|SPHK1|ASNS|EIF2AK4|SIRT1|USF1|SOD1|SYNJ1|SOAT2|CCNE1|DAD1|DDIT3|BCL2|SQSTM1|TP53
7568	0.0014195	0.016899	20	145	aging	VCAM1|PRKCD|H2AFX|FURIN|FOXM1|SIRT1|RELA|RTN4|SOD1|CASP7|DDIT3|DNAJA3|CANX|BCL2|SCAP|PRKCQ|ATM|CALR|TP53|ATR
10646	0.0014653	0.017388	102	1154	regulation of cell communication	ITSN2|FOXA1|ATF2|SLC35B2|APP|IRS1|ITSN1|PARK2|CCND1|AKT1|PIM2|FBXO8|EIF2A|TSPYL2|PRKCD|TSC2|GAPVD1|AR|SCG5|SQSTM1|TP53|PXK|SHC1|CUL3|PSEN1|STK4|RTN4|STK3|PRDX2|PRDX1|HMOX1|GOT1|HSPA5|IQSEC1|EIF2AK3|ESR1|IL6|SP1|MDM2|REL|PIN1|ATM|CALR|RAB5A|EZH1|ATR|HSP90AB1|PIK3CB|FOXM1|TAZ|IKBKB|PPP3CA|UBL5|CASP8|DBNL|SPHK1|TRAF2|GMIP|ARFGAP3|SIRT1|DUSP6|ARFGAP1|TNFRSF1A|PPM1A|IFNG|TBC1D5|TRAF6|CAT|HCLS1|TLR4|PF…
9165	0.0014758	0.017457	23	177	nucleotide biosynthetic process	ATP8B4|ATP8A2|ATP8A1|ATP8B2|ATP8B1|ATP13A1|ATP10D|ATP2A3|ATP11C|ATP2A2|ATP1A3|ATP11B|ATP10A|ATP1A2|NMNAT2|AK5|ATP2C1|ATP1B1|NMNAT1|ASL|HPRT1|ATP6V0D1|GART
51640	0.00156	0.018395	15	96	organelle localization	COPB2|ARF1|TMED10|SEH1L|COPB1|GBF1|WIPI1|PSEN1|SYNJ2|CENPA|ARFGAP1|GCK|ARCN1|CCNB1|SNAP29
32583	0.0017564	0.020448	26	212	regulation of gene-specific transcription	FOXA1|ATF2|CEBPA|HDAC2|HDAC3|HDAC1|ETS1|RELA|YY1|PAK1|SCAP|TBL1X|SIRT1|FOXP3|NFKB1|USF1|AR|IL6|TBL1XR1|CTNNB1|BCOR|ATF6|TP53|TLR4|PFDN5|TAF1
51259	0.0017407	0.020448	24	190	protein oligomerization	KCNH2|DPAGT1|PRNP|PRKAA2|IRS1|AMFR|EIF2AK3|PRKAG1|TSC2|TRAF2|HK2|TNFRSF1A|CASP8|CAT|PIM1|HMOX1|SMARCAD1|CTNNB1|BAX|ASL|PCBD2|HPRT1|TP53|BIRC3
44087	0.0017532	0.020448	21	158	regulation of cellular component biogenesis	GSK3B|PRKAA1|SRC|FAF1|TSC2|HMGB1|CORO1A|ADD1|PARK2|HCFC1|BAG5|ARPC3|DLC1|CAPZA1|CAPZA2|STUB1|PRKCQ|HSPA1B|ARF6|NCK1|TAF1
70482	0.0017532	0.020448	21	158	response to oxygen levels	RYR2|CREBBP|EGLN3|PRKAA1|VCAM1|ITPR1|ATP1B1|USF1|HK2|HSP90B1|CCNB1|ALDH2|PIM1|UBQLN1|CAPN2|BCL2|HMOX1|SCAP|HYOU1|PRKCQ|TLR4
43122	0.0017667	0.020448	18	127	regulation of I-kappaB kinase/NF-kappaB cascade	SLC35B2|CANT1|GOT1|CFLAR|ATP2C1|RELA|PARK2|TNFRSF1A|IKBKB|PPM1A|CASP8|TRAF6|DNAJA3|REL|HMOX1|PIM2|SQSTM1|TLR4
51439	0.0017669	0.020448	12	69	regulation of ubiquitin-protein ligase activity involved in mitotic cell cycle	PSMA5|PSMA6|CCNB1|PSMB5|PSMC6|RPN2|PSMD2|RPN1|CUL1|PSME2|BUB3|PSMA7
70271	0.0017787	0.020458	51	506	protein complex biogenesis	DPAGT1|GPAA1|IRS1|GTF2B|PRKAG1|TAZ|HK2|CASP8|PIM1|SMARCAD1|NCK1|KCNH2|HSP90AA1|TBP|TUBB|TSC2|TRAF2|TNFRSF1A|CSNK2B|CAT|NDUFS4|TCP1|TFAM|HPRT1|TP53|BIRC3|PRKAA2|SRC|ARL2|CENPA|CCNB1|REPS2|HMOX1|ASL|PCBD2|EPS15|PRNP|CREBBP|AMFR|EIF2AK3|SMARCA5|GTF2H2|CDK7|CAPZA1|CAPZA2|MDM2|CTNNB1|BAX|CALR|TAF1|TUBA8
6461	0.0017787	0.020458	51	506	protein complex assembly	DPAGT1|GPAA1|IRS1|GTF2B|PRKAG1|TAZ|HK2|CASP8|PIM1|SMARCAD1|NCK1|KCNH2|HSP90AA1|TBP|TUBB|TSC2|TRAF2|TNFRSF1A|CSNK2B|CAT|NDUFS4|TCP1|TFAM|HPRT1|TP53|BIRC3|PRKAA2|SRC|ARL2|CENPA|CCNB1|REPS2|HMOX1|ASL|PCBD2|EPS15|PRNP|CREBBP|AMFR|EIF2AK3|SMARCA5|GTF2H2|CDK7|CAPZA1|CAPZA2|MDM2|CTNNB1|BAX|CALR|TAF1|TUBA8
34622	0.0018458	0.020911	35	315	cellular macromolecular complex assembly	SRC|ARL2|TAZ|CENPA|H2AFJ|EPS15|NCK1|EIF2A|TSPYL2|SRPK2|HSP90AA1|H2AFY|H2AFZ|TUBB|H3F3A|RPS6|H2AFX|SMARCA5|NAP1L3|H2AFV|NAP1L1|HIST2H2BE|NAP1L4|H1F0|HIST3H2A|CSNK2B|NDUFS4|TCP1|TFAM|HIST1H4H|CALR|LSM14A|TAF1|TUBA8|HIST1H2BC
42026	0.0018461	0.020911	4	9	protein refolding	DNAJB1|HSP90AA1|BAG1|HSPA1B
45540	0.0018461	0.020911	4	9	regulation of cholesterol biosynthetic process	PRKAA1|TAP1|SCAP|SOD1
46902	0.0018461	0.020911	4	9	regulation of mitochondrial membrane permeability	BCL2|BAK1|BID|TP53
48009	0.0018461	0.020911	4	9	insulin-like growth factor receptor signaling pathway	IRS1|EIF2AK3|AKT1|TSC2
70555	0.0019	0.021457	7	28	response to interleukin-1	PCSK1|PRKCI|SRC|SPHK1|TRAF6|RELA|KLF2
1836	0.0019113	0.02152	6	21	release of cytochrome c from mitochondria	CASP7|BCL2|BAX|BAK1|BID|TP53
9966	0.0019218	0.021573	72	772	regulation of signal transduction	ITSN2|SLC35B2|APP|HSP90AB1|ITSN1|PIK3CB|FOXM1|PARK2|IKBKB|CASP8|AKT1|PIM2|FBXO8|EIF2A|TSPYL2|DBNL|SPHK1|PRKCD|TSC2|TRAF2|GAPVD1|GMIP|ARFGAP3|DUSP6|ARFGAP1|TNFRSF1A|AR|PPM1A|IFNG|TBC1D5|TRAF6|CAT|HCLS1|SQSTM1|TLR4|ARF6|PRKAA1|CANT1|HDAC3|SHC1|CUL3|PSEN1|ATP2C1|AGPAT1|AGPAT2|RELA|FGD1|FGD3|PRDX2|PPP2CB|PAK1|FGD6|PRDX1|HMOX1|PAK3|MAP4K5|FARP2|FARP1|GOT1|IQSEC1|GBF1|EIF2AK3|CFLAR|SOD1|IL6|GOLPH3|TAOK…
51301	0.0019476	0.021797	35	316	cell division	TSG101|SEH1L|ROCK1|CUL3|VPS4B|VPS4A|PIK3CB|TAZ|CDC14A|HK2|CKS1B|CCNB1|CCND1|KATNA1|NEK1|NEK2|BUB3|BUB1|NEK8|NEK9|UBE2I|PDCD6IP|NEK4|ZBTB16|CDC25A|CDC25B|CCNA1|CDK7|CDK6|KIF2A|CCNE1|CDK4|CKS2|KIF2C|ARL8B
6323	0.0019581	0.021849	17	118	DNA packaging	TSPYL2|H2AFY|H2AFZ|H3F3A|H2AFX|SMARCA5|NAP1L3|H2AFV|NAP1L1|CENPA|HIST2H2BE|NAP1L4|H1F0|HIST3H2A|H2AFJ|HIST1H4H|HIST1H2BC
1666	0.0019799	0.022026	20	149	response to hypoxia	RYR2|CREBBP|EGLN3|PRKAA1|VCAM1|ITPR1|ATP1B1|USF1|HK2|HSP90B1|CCNB1|PIM1|UBQLN1|CAPN2|BCL2|HMOX1|SCAP|HYOU1|PRKCQ|TLR4
71103	0.0020521	0.022695	19	139	DNA conformation change	TSPYL2|H2AFY|H2AFZ|H3F3A|H2AFX|SMARCA5|NAP1L3|MRE11A|H2AFV|NAP1L1|HMGB1|CENPA|HIST2H2BE|NAP1L4|H1F0|HIST3H2A|H2AFJ|HIST1H4H|HIST1H2BC
7033	0.0020513	0.022695	9	44	vacuole organization	MAP1LC3A|GAA|PPT1|TPP1|PSEN1|CTSD|HK2|ATG5|HK1
10605	0.002214	0.024413	74	802	negative regulation of macromolecule metabolic process	FOXA1|HSP90AB1|SUV39H1|HMGB1|TAZ|PARK2|YY1|VPS72|PSMD2|UBTF|TSPYL2|USP4|PRKCD|USP2|PAX5|SIRT1|FOXP3|PSMA5|PSMA6|ILF3|TBL1XR1|TRAF6|PSME2|TP53|PFDN5|VPS28|CEBPA|HDAC2|TSG101|HDAC3|RPN2|HDAC1|RPN1|FURIN|PSEN1|PSMA7|RELA|PHF21A|CCNB1|PSMB5|BAG5|NSD1|RAB23|IGF2BP1|RPS3|TBL1X|BUB3|ZNF148|ATG5|EIF2B5|SMARCE1|SUZ12|EIF2B4|UBE2I|ATP8B1|EIF2AK1|ZBTB16|EIF2AK3|SMARCA5|MRE11A|EIF2AK4|PA2G4|NFKB1|RPS26|IL6|P…
23051	0.0022684	0.024866	72	777	regulation of signaling process	ITSN2|SLC35B2|APP|HSP90AB1|ITSN1|PIK3CB|FOXM1|PARK2|IKBKB|CASP8|AKT1|PIM2|FBXO8|EIF2A|TSPYL2|DBNL|SPHK1|PRKCD|TSC2|TRAF2|GAPVD1|GMIP|ARFGAP3|DUSP6|ARFGAP1|TNFRSF1A|AR|PPM1A|IFNG|TBC1D5|TRAF6|CAT|HCLS1|SQSTM1|TLR4|ARF6|PRKAA1|CANT1|HDAC3|SHC1|CUL3|PSEN1|ATP2C1|AGPAT1|AGPAT2|RELA|FGD1|FGD3|PRDX2|PPP2CB|PAK1|FGD6|PRDX1|HMOX1|PAK3|MAP4K5|FARP2|FARP1|GOT1|IQSEC1|GBF1|EIF2AK3|CFLAR|SOD1|IL6|GOLPH3|TAOK…
6163	0.0022641	0.024866	22	172	purine nucleotide metabolic process	ATP8B4|ATP8A2|ATP8A1|ATP8B2|ATP8B1|ATP13A1|VPS4B|ATP10D|ATP2A3|ATP11C|ATP2A2|ATP1A3|ATP11B|ATP10A|ATP1A2|AK5|ATP2C1|ATP1B1|ASL|HPRT1|ATP6V0D1|GART
7006	0.0023634	0.025831	7	29	mitochondrial membrane organization	HSP90AA1|BCL2|BAK1|BID|DNM1L|TAZ|TP53
44093	0.0024551	0.026665	61	639	positive regulation of molecular function	FOXA1|ATF2|CERK|IRS1|PDCD6|PRKAG1|PIK3CB|HMGB1|IKBKB|CASP9|UBL5|CCND1|PSMD2|PIM1|AKT1|DBNL|SPHK1|TSC2|TRAF2|SENP1|PSMA5|PSMA6|IFNG|TRAF6|CAT|PPAP2A|PSME2|TP53|TLR4|CERKL|PRKAA1|RPN2|SHC1|RPN1|CEBPG|CUL1|ADRB1|PSEN1|PSMA7|RELA|ADD1|PRDX3|PRDX2|PAK1|CCNB1|PSMB5|RPS3|MAP4K5|HSPA5|EIF2AK3|MRE11A|SOD1|IL6|PSMC6|DNAJA3|DLC1|BCL2|PIN1|CYCS|BAX|TPP1
34404	0.0024611	0.026665	23	184	nucleobase, nucleoside and nucleotide biosynthetic process	ATP8B4|ATP8A2|ATP8A1|ATP8B2|ATP8B1|ATP13A1|ATP10D|ATP2A3|ATP11C|ATP2A2|ATP1A3|ATP11B|ATP10A|ATP1A2|NMNAT2|AK5|ATP2C1|ATP1B1|NMNAT1|ASL|HPRT1|ATP6V0D1|GART
34654	0.0024611	0.026665	23	184	nucleobase, nucleoside, nucleotide and nucleic acid biosynthetic process	ATP8B4|ATP8A2|ATP8A1|ATP8B2|ATP8B1|ATP13A1|ATP10D|ATP2A3|ATP11C|ATP2A2|ATP1A3|ATP11B|ATP10A|ATP1A2|NMNAT2|AK5|ATP2C1|ATP1B1|NMNAT1|ASL|HPRT1|ATP6V0D1|GART
9628	0.0024802	0.026794	42	404	response to abiotic stimulus	APP|HDAC2|CLPB|DHX9|SLC2A1|HSPB1|ADRB1|ATP1A2|RELA|ERO1L|SLC9A1|SMPD2|PAK1|CCNB1|CASP7|MAPK8|SLK|CASP8|CCND1|AKT1|RBBP7|SLC12A2|EIF2B5|EIF2B4|VCAM1|HSPA1L|H2AFX|ASNS|UBE4B|GTF2H2|USF1|SOD1|DNAJA1|COPS3|DNAJA3|CAT|DNAJA2|BCL2|PRKCQ|ATM|TP53|ATR
45862	0.0024895	0.026818	8	37	positive regulation of proteolysis	HDAC2|IFNG|SUMO2|MDM2|AKT1|FURIN|STUB1|TAF1
31331	0.0025847	0.027244	10	54	positive regulation of cellular catabolic process	IFNG|IRS1|SUMO2|MDM2|GAPDHS|AKT1|FURIN|STUB1|PIM2|TAF1
33688	0.0026238	0.027244	3	5	regulation of osteoblast proliferation	EIF2AK1|BCL2|EIF2AK2
10870	0.0026238	0.027244	3	5	positive regulation of receptor biosynthetic process	HDAC2|HDAC1|SCAP
2724	0.0026238	0.027244	3	5	regulation of T cell cytokine production	TRAF6|TRAF2|FOXP3
70231	0.0026238	0.027244	3	5	T cell apoptosis	DNAJA3|RPS6|AKT1
46335	0.0026238	0.027244	3	5	ethanolamine biosynthetic process	CHKB|CHKA|ETNK2
46337	0.0026238	0.027244	3	5	phosphatidylethanolamine metabolic process	CHKB|CHKA|ETNK2
46856	0.0026238	0.027244	3	5	phosphoinositide dephosphorylation	INPP5F|OCRL|SYNJ2
30970	0.0026238	0.027244	3	5	retrograde protein transport, ER to cytosol	DERL1|DERL2|SEC61B
6580	0.0026238	0.027244	3	5	ethanolamine metabolic process	CHKB|CHKA|ETNK2
6646	0.0026238	0.027244	3	5	phosphatidylethanolamine biosynthetic process	CHKB|CHKA|ETNK2
6924	0.0026238	0.027244	3	5	activation-induced cell death of T cells	DNAJA3|RPS6|AKT1
32057	0.0026238	0.027244	3	5	negative regulation of translational initiation in response to stress	EIF2B5|EIF2B4|EIF2AK3
10627	0.002667	0.027615	35	322	regulation of intracellular protein kinase cascade	SLC35B2|CANT1|HDAC3|ITSN1|FOXM1|ATP2C1|RELA|PARK2|IKBKB|PAK1|CASP8|PRDX1|AKT1|HMOX1|PIM2|MAP4K5|DBNL|GOT1|TSC2|TRAF2|CFLAR|DUSP6|TNFRSF1A|AR|PPM1A|IL6|TAOK3|IFNG|TRAF6|DNAJA3|REL|HCLS1|CTNNB1|SQSTM1|TLR4
6350	0.0027127	0.028011	37	346	transcription	CEBPA|CEBPB|CEBPD|GTF2B|NRF1|YBX1|FOXM1|ETS1|NFIL3|CCRN4L|TBP|SMARCA5|GTF3A|TRIP4|PAX5|GTF2H2|ESR1|NFKB1|USF1|HCFC1|AR|CREB3|CDK7|COPS5|POLR3B|RRAGC|FUBP3|NACA|DDIT3|XRN2|POLR1D|TCEA1|TFAM|TP53|NFE2L1|NFE2L2|TAF1
6446	0.0028308	0.02915	9	46	regulation of translational initiation	EIF2B5|EIF5B|EIF2B4|EIF2AK1|EIF2AK3|HSPB1|EIF2AK4|EIF2S1|EIF2A
51983	0.0029161	0.029783	4	10	regulation of chromosome segregation	CCNB1|KIF2C|BUB3|BUB1
14074	0.0029161	0.029783	4	10	response to purine	RYR2|PRKAA2|CCNE1|BCL2
32026	0.0029161	0.029783	4	10	response to magnesium ion	RYR2|CCND1|SPHK1|ENTPD6
31145	0.0029797	0.029941	11	64	anaphase-promoting complex-dependent proteasomal ubiquitin-dependent protein catabolic process	PSMA5|PSMA6|CCNB1|PSMB5|PSMC6|RPN2|PSMD2|RPN1|PSME2|BUB3|PSMA7
70925	0.0029754	0.029941	10	55	organelle assembly	MAP1LC3A|HDAC3|TUBB|RPS6|PSEN1|CENPA|CORO1A|CTSD|ATG5|EIF2A
16050	0.0029754	0.029941	10	55	vesicle organization	COPB2|ARF1|PRKCI|COPB1|GBF1|BCL2|CORO1A|EPS15|ARFGAP1|ARCN1
33013	0.0029735	0.029941	8	38	tetrapyrrole metabolic process	UROD|EIF2AK1|CPOX|HMOX1|DBI|NRF1|NFE2L1|ATR
34614	0.0029735	0.029941	8	38	cellular response to reactive oxygen species	PRDX3|PRDX2|PRDX5|SPHK1|PRDX1|CAT|KLF2|SOD1
6778	0.0029735	0.029941	8	38	porphyrin metabolic process	UROD|EIF2AK1|CPOX|HMOX1|DBI|NRF1|NFE2L1|ATR
16486	0.002988	0.029944	5	16	peptide hormone processing	PCSK2|PCSK1|SCG5|FURIN|PCSK6
45786	0.0030207	0.030191	22	176	negative regulation of cell cycle	TSPYL2|PRNP|HDAC2|TSG101|HDAC3|HDAC1|CUL3|CUL1|PA2G4|ETS1|PPM1G|CREB3|CDK6|IFNG|DDIT3|MYC|BCL2|ATM|CALR|TP53|BUB1|ILKAP
34504	0.003144	0.031339	14	93	protein localization in nucleus	RANBP2|PDIA3|ZBTB16|TSC2|NCKIPSD|PPP3CA|IFNG|LMNA|MDM2|AKT1|MAPK1|SEC61B|TP53|RBM22
48538	0.0031729	0.031543	6	23	thymus development	PRDX2|BCL2L11|BCL2|CTNNB1|PSEN1|SOD1
6606	0.0032465	0.03219	12	74	protein import into nucleus	NCKIPSD|RANBP2|PDIA3|PPP3CA|IFNG|LMNA|AKT1|TSC2|MAPK1|SEC61B|TP53|RBM22
46483	0.0032834	0.032469	36	338	heterocycle metabolic process	ATP8A2|ATP8A1|VPS4B|ATP10D|ATP2A3|CPOX|ATP2A2|ATP1A3|ATP10A|DBI|ATP1A2|NRF1|AK5|ATP2C1|ALDH1L2|UROD|HMOX1|MAPK1|ASL|PCBD2|ATP8B4|ATP8B2|ENTPD4|ATP8B1|ATP13A1|EIF2AK1|ATP11C|ATP11B|ATP1B1|CYP2E1|P4HB|HPRT1|ATP6V0D1|GART|NFE2L1|ATR
51437	0.0033768	0.033217	11	65	positive regulation of ubiquitin-protein ligase activity involved in mitotic cell cycle	PSMA5|PSMA6|CCNB1|PSMB5|PSMC6|RPN2|PSMD2|RPN1|CUL1|PSME2|PSMA7
43392	0.0033768	0.033217	11	65	negative regulation of DNA binding	PRDX2|HDAC2|DDIT3|DNAJA3|CAT|CEBPG|PIM1|RPS3|HMOX1|SIRT1|FOXP3
43254	0.0034747	0.03409	14	94	regulation of protein complex assembly	GSK3B|SRC|FAF1|HMGB1|CORO1A|ADD1|HCFC1|ARPC3|CAPZA1|CAPZA2|STUB1|ARF6|NCK1|TAF1
50790	0.0035012	0.03426	81	908	regulation of catalytic activity	ATF2|APP|CERK|IRS1|PDCD6|PRKAG1|PIK3CB|HMGB1|TAZ|HERPUD1|CKS1B|CASP9|UBL5|CCND1|PSMD2|PIM1|AKT1|TSPYL2|DBNL|SPHK1|TSC2|TRAF2|GMIP|ARFGAP3|SIRT1|DUSP6|CDC25A|ARFGAP1|SENP1|PSMA5|AR|PSMA6|IFNG|TBC1D5|TRAF6|PPAP2A|CKS2|PSME2|AMPH|TP53|TLR4|CERKL|PRKAA1|PXK|RPN2|SHC1|RPN1|CUL1|FURIN|ADRB1|PSEN1|PSMA7|FGD1|HSP90B1|PRDX3|FGD3|PRDX2|PAK1|CCNB1|PSMB5|FGD6|BAG5|RPS3|BUB3|MAP4K5|PAK2|HSPA5|EIF2AK3|MRE11A|N…
60	0.0035463	0.034611	7	31	protein import into nucleus, translocation	IFNG|LMNA|AKT1|MAPK1|SEC61B|TP53|RBM22
6605	0.003668	0.035706	24	201	protein targeting	RANBP2|PDIA3|PRKCI|SSR2|SRPR|SSR3|TOMM34|TSC2|DBI|NCKIPSD|PPP3CA|IFNG|SEC61G|TOMM70A|LMNA|AKT1|SSR1|MAPK1|CALR|SEC61B|BID|TP53|SEC63|RBM22
51651	0.0038153	0.036947	11	66	maintenance of location in cell	PDIA3|SEH1L|KDELR1|GPAA1|GAA|FAF1|KDELR2|SRI|KDELR3|BUB3|TLN1
30258	0.0038153	0.036947	11	66	lipid modification	ACADVL|INPP5F|SOAT2|PPAP2A|PIK3C3|OCRL|PIK3CB|SYNJ2|PIK3C2A|ADIPOR2|PIK3CG
30099	0.0038333	0.037025	14	95	myeloid cell differentiation	CEBPA|ZBTB16|RPS6|CEBPG|PSEN1|BPGM|PRDX3|SNRK|CASP8|SP1|TRAF6|SP3|TCEA1|HCLS1
51291	0.0038976	0.037549	10	57	protein heterooligomerization	KCNH2|PRKAA2|CASP8|IRS1|PRKAG1|CTNNB1|TSC2|PCBD2|TNFRSF1A|BIRC3
6829	0.0039969	0.038285	6	24	zinc ion transport	SLC39A6|SLC39A8|SLC39A12|SLC39A7|SLC39A14|SLC39A4
16575	0.0040047	0.038285	5	17	histone deacetylation	HDAC2|HDAC3|HDAC1|HDAC11|SIRT1
70534	0.0040047	0.038285	5	17	protein K63-linked ubiquitination	TRAF6|UBE2G1|TRAF2|RNF5|PARK2
51704	0.0043979	0.039141	71	785	multi-organism process	PCSK1|APP|SUV39H1|GTF2B|HSPB1|SYNCRIP|SLK|CASP8|ALDH2|PIM2|TRIM23|TBP|PDCD6IP|SPHK1|PLA2G4B|TAP2|TAP1|SIRT1|HIST2H2BE|TNFRSF1A|HCFC1|AR|CREB3|RRAGA|IFNG|ATF7|TP53|PPIA|TLR4|IFNAR1|HIST1H2BC|RTN3|CEBPA|TSG101|SRC|HDAC1|COPB1|DERL1|CUL1|CENPA|ADIPOR2|PSMA7|RELA|PRDX3|PRDX2|PSMB5|PCBP2|MAPK1|PAK2|MAPK3|CREBBP|VCAM1|UBE2I|EIF2AK1|EIF2AK2|CFLAR|ESR1|SOD1|IL6|CDK6|POLR3B|NACA|SP1|VAPB|SP3|MDM2|BCL2|FBX…
43085	0.0043897	0.039141	53	554	positive regulation of catalytic activity	ATF2|CERK|IRS1|PDCD6|PRKAG1|PIK3CB|HMGB1|CASP9|UBL5|CCND1|PSMD2|PIM1|AKT1|DBNL|SPHK1|TSC2|TRAF2|SENP1|PSMA5|PSMA6|IFNG|TRAF6|PPAP2A|PSME2|TP53|TLR4|CERKL|PRKAA1|RPN2|SHC1|RPN1|CUL1|ADRB1|PSEN1|PSMA7|PRDX2|PAK1|CCNB1|PSMB5|RPS3|MAP4K5|HSPA5|EIF2AK3|MRE11A|SOD1|PSMC6|DNAJA3|DLC1|BCL2|PIN1|CYCS|BAX|TPP1
51235	0.0041919	0.039141	13	86	maintenance of location	PDIA3|SEH1L|KDELR1|GPAA1|GAA|FAF1|SRI|HSP90B1|KDELR2|KDELR3|CALR|BUB3|TLN1
51352	0.004298	0.039141	11	67	negative regulation of ligase activity	PSMA5|PSMA6|PSMB5|PSMC6|BAG5|RPN2|PSMD2|RPN1|PSME2|BUB3|PSMA7
51444	0.004298	0.039141	11	67	negative regulation of ubiquitin-protein ligase activity	PSMA5|PSMA6|PSMB5|PSMC6|BAG5|RPN2|PSMD2|RPN1|PSME2|BUB3|PSMA7
31334	0.0042843	0.039141	7	32	positive regulation of protein complex assembly	GSK3B|SRC|FAF1|STUB1|ARF6|NCK1|TAF1
43516	0.0043438	0.039141	4	11	regulation of DNA damage response, signal transduction by p53 class mediator	MDM2|ATM|SIRT1|ATR
61077	0.0043438	0.039141	4	11	chaperone-mediated protein folding	DNAJB1|TOR1A|BAG1|ERO1L
45022	0.0043438	0.039141	4	11	early endosome to late endosome transport	SNX16|VPS4B|HK2|HK1
31293	0.0043438	0.039141	4	11	membrane protein intracellular domain proteolysis	TRAF6|PSEN1|NFKB1|RELA
32792	0.0043897	0.039141	2	2	negative regulation of CREB transcription factor activity	DDIT3|FOXP3
32898	0.0043897	0.039141	2	2	neurotrophin production	FURIN|PCSK6
32902	0.0043897	0.039141	2	2	nerve growth factor production	FURIN|PCSK6
34349	0.0043897	0.039141	2	2	glial cell apoptosis	BCL2|BID
51097	0.0043897	0.039141	2	2	negative regulation of helicase activity	SIRT1|TP53
10248	0.0043897	0.039141	2	2	establishment or maintenance of transmembrane electrochemical gradient	BAX|BAK1
51563	0.0043897	0.039141	2	2	smooth endoplasmic reticulum calcium ion homeostasis	APP|PSEN1
51583	0.0043897	0.039141	2	2	dopamine uptake	PARK7|PARK2
19042	0.0043897	0.039141	2	2	latent virus infection	CREB3|HCFC1
19046	0.0043897	0.039141	2	2	reactivation of latent virus	CREB3|HCFC1
43653	0.0043897	0.039141	2	2	mitochondrial fragmentation involved in apoptosis	BAX|DNM1L
51934	0.0043897	0.039141	2	2	catecholamine uptake involved in synaptic transmission	PARK7|PARK2
19550	0.0043897	0.039141	2	2	glutamate catabolic process to aspartate	GOT1|GOT2
19551	0.0043897	0.039141	2	2	glutamate catabolic process to 2-oxoglutarate	GOT1|GOT2
71218	0.0043897	0.039141	2	2	cellular response to misfolded protein	STUB1|RNF5
71480	0.0043897	0.039141	2	2	cellular response to gamma radiation	ATM|ATR
46967	0.0043897	0.039141	2	2	cytosol to ER transport	TAP2|TAP1
6532	0.0043897	0.039141	2	2	aspartate biosynthetic process	GOT1|GOT2
16320	0.0043897	0.039141	2	2	endoplasmic reticulum membrane fusion	VCPIP1|BNIP1
34101	0.0044187	0.039233	9	49	erythrocyte homeostasis	SP1|PRDX1|SP3|RPS6|CEBPG|TCEA1|HMOX1|HCLS1|BPGM
17038	0.0044438	0.039362	16	117	protein import	RANBP2|PDIA3|TOMM34|TSC2|DBI|NCKIPSD|PPP3CA|IFNG|TOMM70A|LMNA|AKT1|MAPK1|SEC61B|BID|TP53|RBM22
6357	0.0045313	0.039871	68	747	regulation of transcription from RNA polymerase II promoter	FOXA1|ATF2|APP|HMGB1|TAZ|ETS1|YY1|VPS72|MYC|PUS1|USP2|PAX5|HCFC2|SIRT1|FOXP3|TNFRSF1A|AR|CREB3|PAX8|TBL1XR1|TRAF6|ATF6|SQSTM1|TP53|TLR4|BLZF1|ATF4|CEBPA|SMARCD1|HDAC2|CEBPB|HDAC3|HDAC1|CEBPG|FOXK2|NRF1|HTATSF1|RELA|PHF21A|PSMC3IP|PAK1|NSD1|HMOX1|SCAP|TBL1X|ZNF148|SMARCE1|SUZ12|CREBBP|NFYC|SMARCA5|FOXN1|NFKB1|USF1|FOSL2|KLF7|IL6|CDK7|SP1|MDM2|TCEA1|CTNNB1|SP7|CALR|BCOR|LPIN2|IL17A|TAF1
42035	0.0045332	0.039871	12	77	regulation of cytokine biosynthetic process	IL6|CEBPB|IFNG|TRAF6|CEBPG|IGF2BP1|REL|HMOX1|PRKCQ|FOXP3|TLR4|RELA
51170	0.0045332	0.039871	12	77	nuclear import	NCKIPSD|RANBP2|PDIA3|PPP3CA|IFNG|LMNA|AKT1|TSC2|MAPK1|SEC61B|TP53|RBM22
32880	0.0045683	0.040085	21	171	regulation of protein localization	PCSK1|GSK3B|MBTPS1|PRKCI|SPHK1|FAF1|GAPVD1|TAZ|SIRT1|FOXP3|SCAMP5|CCNB1|IL6|RAB14|IFNG|PRDX1|TRAF6|BCL2|AKT1|PRKCQ|TLR4
43280	0.0048281	0.042167	11	68	positive regulation of caspase activity	CASP9|PDCD6|DNAJA3|DLC1|EIF2AK3|RPS3|CYCS|BAX|HMGB1|TP53|SENP1
10952	0.0048281	0.042167	11	68	positive regulation of peptidase activity	CASP9|PDCD6|DNAJA3|DLC1|EIF2AK3|RPS3|CYCS|BAX|HMGB1|TP53|SENP1
55067	0.0048729	0.042459	8	41	monovalent inorganic cation homeostasis	SLC9A2|SLC12A5|SLC9A6|MAFG|SLC9A9|PPT1|HK2|SLC9A1
43488	0.0049691	0.043072	6	25	regulation of mRNA stability	ATF2|SYNCRIP|DHX9|IGF2BP1|PABPC1|YBX1
70301	0.0049691	0.043072	6	25	cellular response to hydrogen peroxide	PRDX3|PRDX2|SPHK1|PRDX1|CAT|KLF2
43353	0.0049893	0.043072	3	6	enucleate erythrocyte differentiation	SP1|SP3|CEBPG
32055	0.0049893	0.043072	3	6	negative regulation of translation in response to stress	EIF2B5|EIF2B4|EIF2AK3
6919	0.0050322	0.043342	10	59	activation of caspase activity	CASP9|PDCD6|DNAJA3|DLC1|EIF2AK3|RPS3|CYCS|BAX|TP53|SENP1
52548	0.0050933	0.043767	14	98	regulation of endopeptidase activity	HSPA5|PDCD6|EIF2AK3|FURIN|HMGB1|HERPUD1|SENP1|CASP9|DNAJA3|DLC1|RPS3|CYCS|BAX|TP53
6885	0.0051327	0.044005	7	33	regulation of pH	SLC9A2|SLC12A5|SLC9A6|MAFG|SLC9A9|PPT1|SLC9A1
737	0.0052464	0.044571	5	18	DNA catabolic process, endonucleolytic	ENDOG|PPT1|CYCS|BAX|SOD1
2718	0.0052464	0.044571	5	18	regulation of cytokine production involved in immune response	TRAF6|HMOX1|TRAF2|FOXP3|TLR4
70997	0.0052464	0.044571	5	18	neuron death	APP|PIGT|BAG5|BCL2|BID
6309	0.0052464	0.044571	5	18	DNA fragmentation involved in apoptotic nuclear change	ENDOG|PPT1|CYCS|BAX|SOD1
8284	0.0053628	0.045456	45	459	positive regulation of cell proliferation	HDAC2|SHC1|IRS1|HDAC1|CUL3|DERL2|FOXM1|TAZ|CORO1A|RELA|PRDX3|RPS4X|CCNB1|CAPNS1|CCND1|MYC|HMOX1|SSR1|MAPK1|CAPN1|NCK1|PDGFRB|SUZ12|VCAM1|SPHK1|NAP1L1|ESR1|CDC25B|FOSL2|IL6|CDK6|IFNG|CDK4|TRAF6|DNAJA3|NDUFS4|DNAJA2|MDM2|BCL2|HCLS1|CTNNB1|PRKCQ|CALR|TLR4|ATF3
5975	0.0054327	0.045924	50	522	carbohydrate metabolic process	POMT2|DPAGT1|GSK3B|TUSC3|POMT1|HK2|HK1|ALDH2|MAN1A2|AKT1|DLAT|GUSB|EPM2A|ALG8|ALG6|GAA|ALG5|TALDO1|ALG3|ALG12|BPGM|PGD|DDOST|DPM1|AR|DAD1|GAPDHS|TFF1|MAN1B1|GCS1|HAGH|ATF3|ATF4|RPN2|RPN1|PSEN1|GANAB|LDHA|MAN1C1|PCK2|MGAM|PMM1|GOT1|SYNJ2|GCK|USF1|STT3A|STT3B|GPD1L|IL17A
51099	0.0054426	0.045924	15	109	positive regulation of binding	FOXA1|SPHK1|CEBPG|EIF2AK3|TRAF2|HMGB1|RELA|ADD1|IKBKB|PRDX3|IL6|TRAF6|CAT|TPP1|TLR4
33044	0.0056775	0.047691	8	42	regulation of chromosome organization	CCNB1|MYC|TPP1|PAX5|BCOR|FOXP3|TP53|BUB1
42102	0.0056775	0.047691	8	42	positive regulation of T cell proliferation	IL6|VCAM1|IFNG|TRAF6|DNAJA3|PRKCQ|CORO1A|NCK1
33043	0.0057914	0.048539	27	243	regulation of organelle organization	CUL7|CLIC4|CORO1A|ADD1|PARK2|UBL5|CCNB1|MYC|NEK2|BUB1|NCK1|TSC2|PAX5|FOXP3|GOLPH3|ARPC3|DLC1|CAPZA1|CAPZA2|PIN1|CTNNB1|PRKCQ|TPP1|ATM|BCOR|TP53|ARF6
44092	0.005921	0.049514	38	375	negative regulation of molecular function	GSK3B|HDAC2|PXK|RPN2|RPN1|CEBPG|PSEN1|PARK7|TAZ|PSMA7|HERPUD1|PRDX3|PRDX2|PSMB5|BAG5|PSMD2|PIM1|RPS3|AKT1|HMOX1|BUB3|PAK2|HSPA5|PRKCD|TSC2|GMIP|SIRT1|FOXP3|DUSP6|NFKB1|PSMA5|PSMA6|PSMC6|DDIT3|DNAJA3|CAT|PSME2|TP53
